# Supplementary material for: One-pot synthesis of alkyl pyrrole-2-carboxylates starting from β-nitroacrylates and primary amines
Source: Royal Society of Chemistry journal article supplement (doi:10.1039/c4ra13094d), 2014-12-09

<sup>1</sup>H NMR Compound **6aa**.

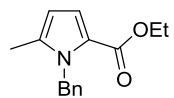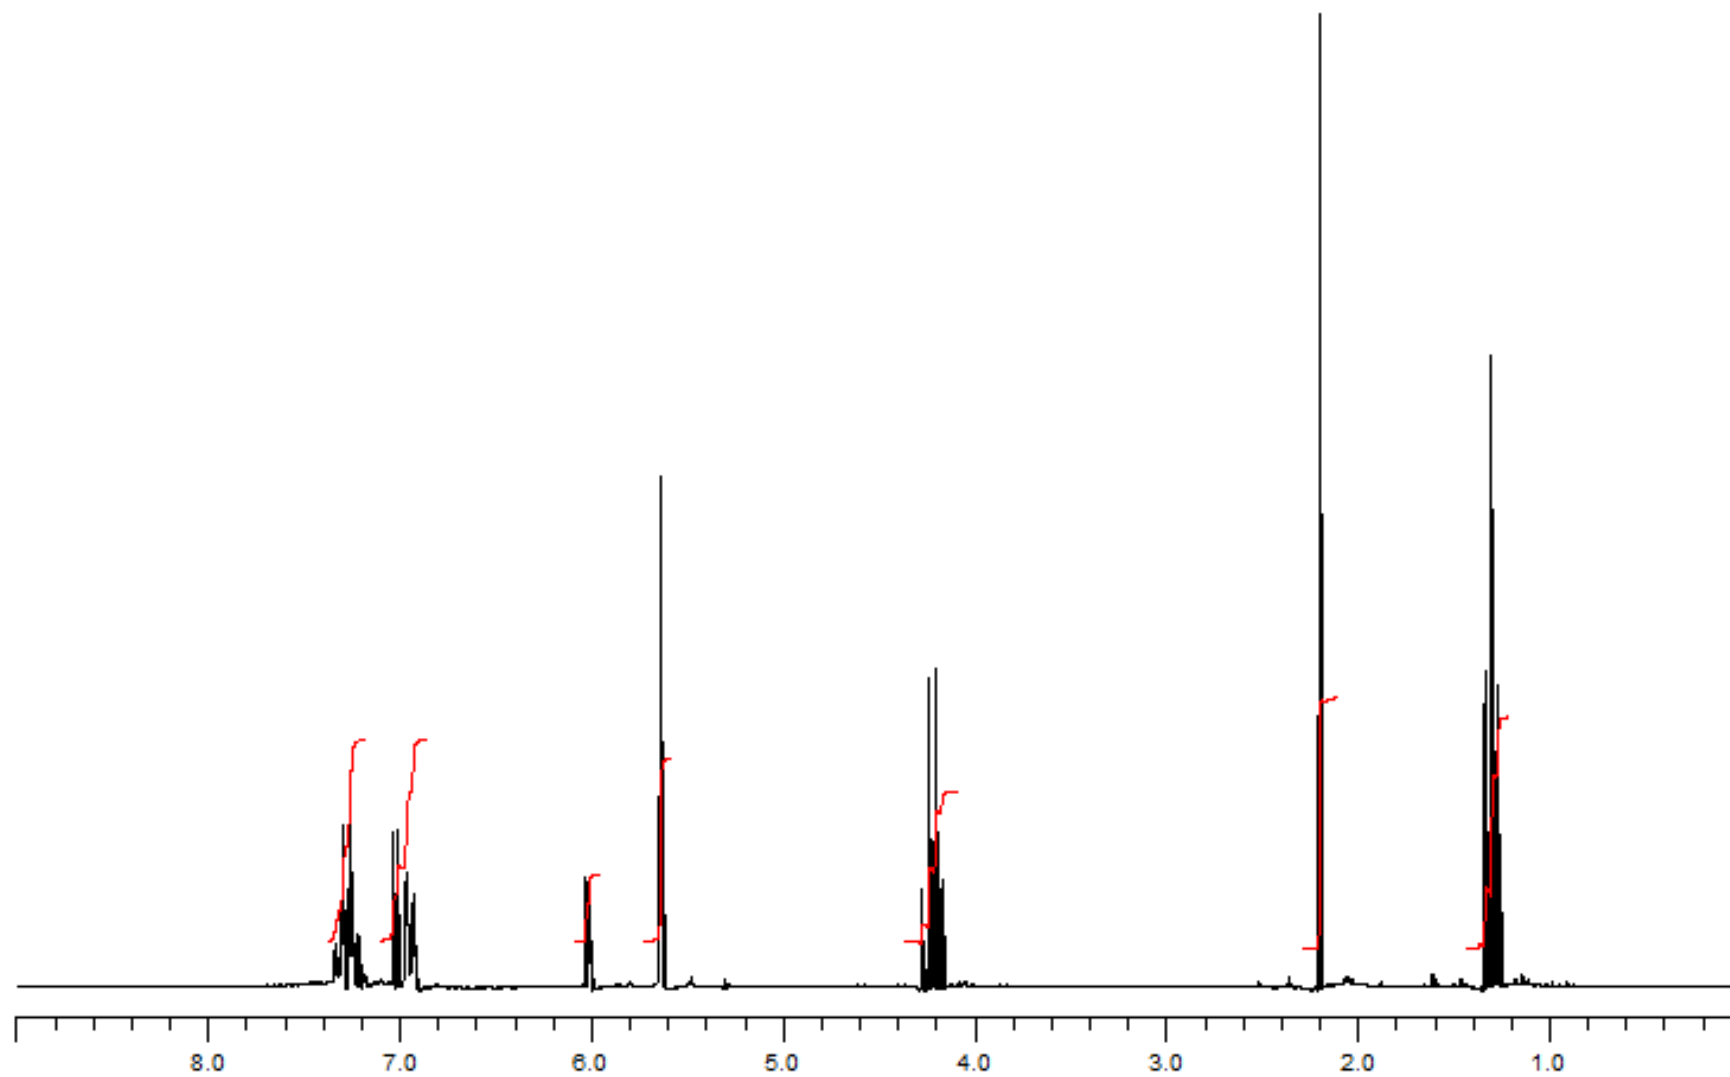

<sup>13</sup>C NMR Compound **6aa**.

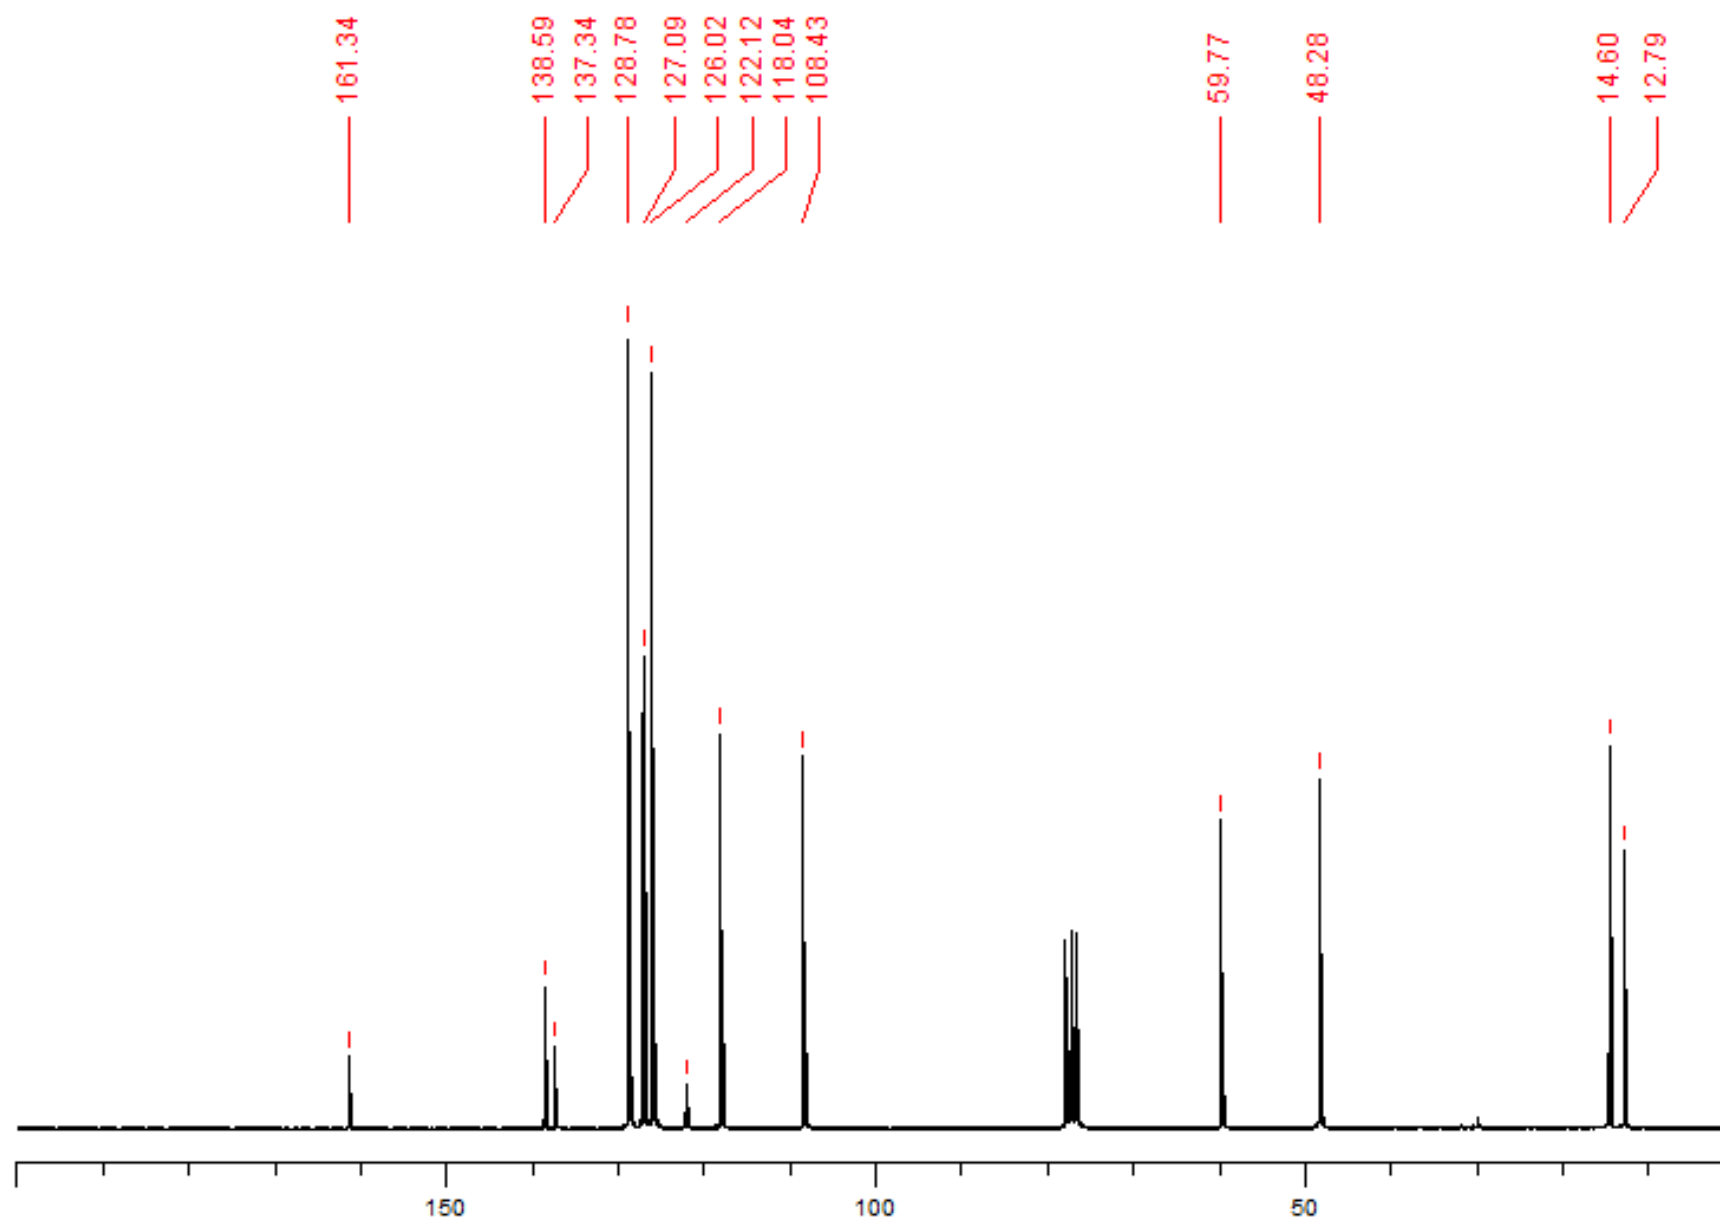

<sup>1</sup>H NMR Compound **6ab**.

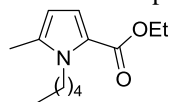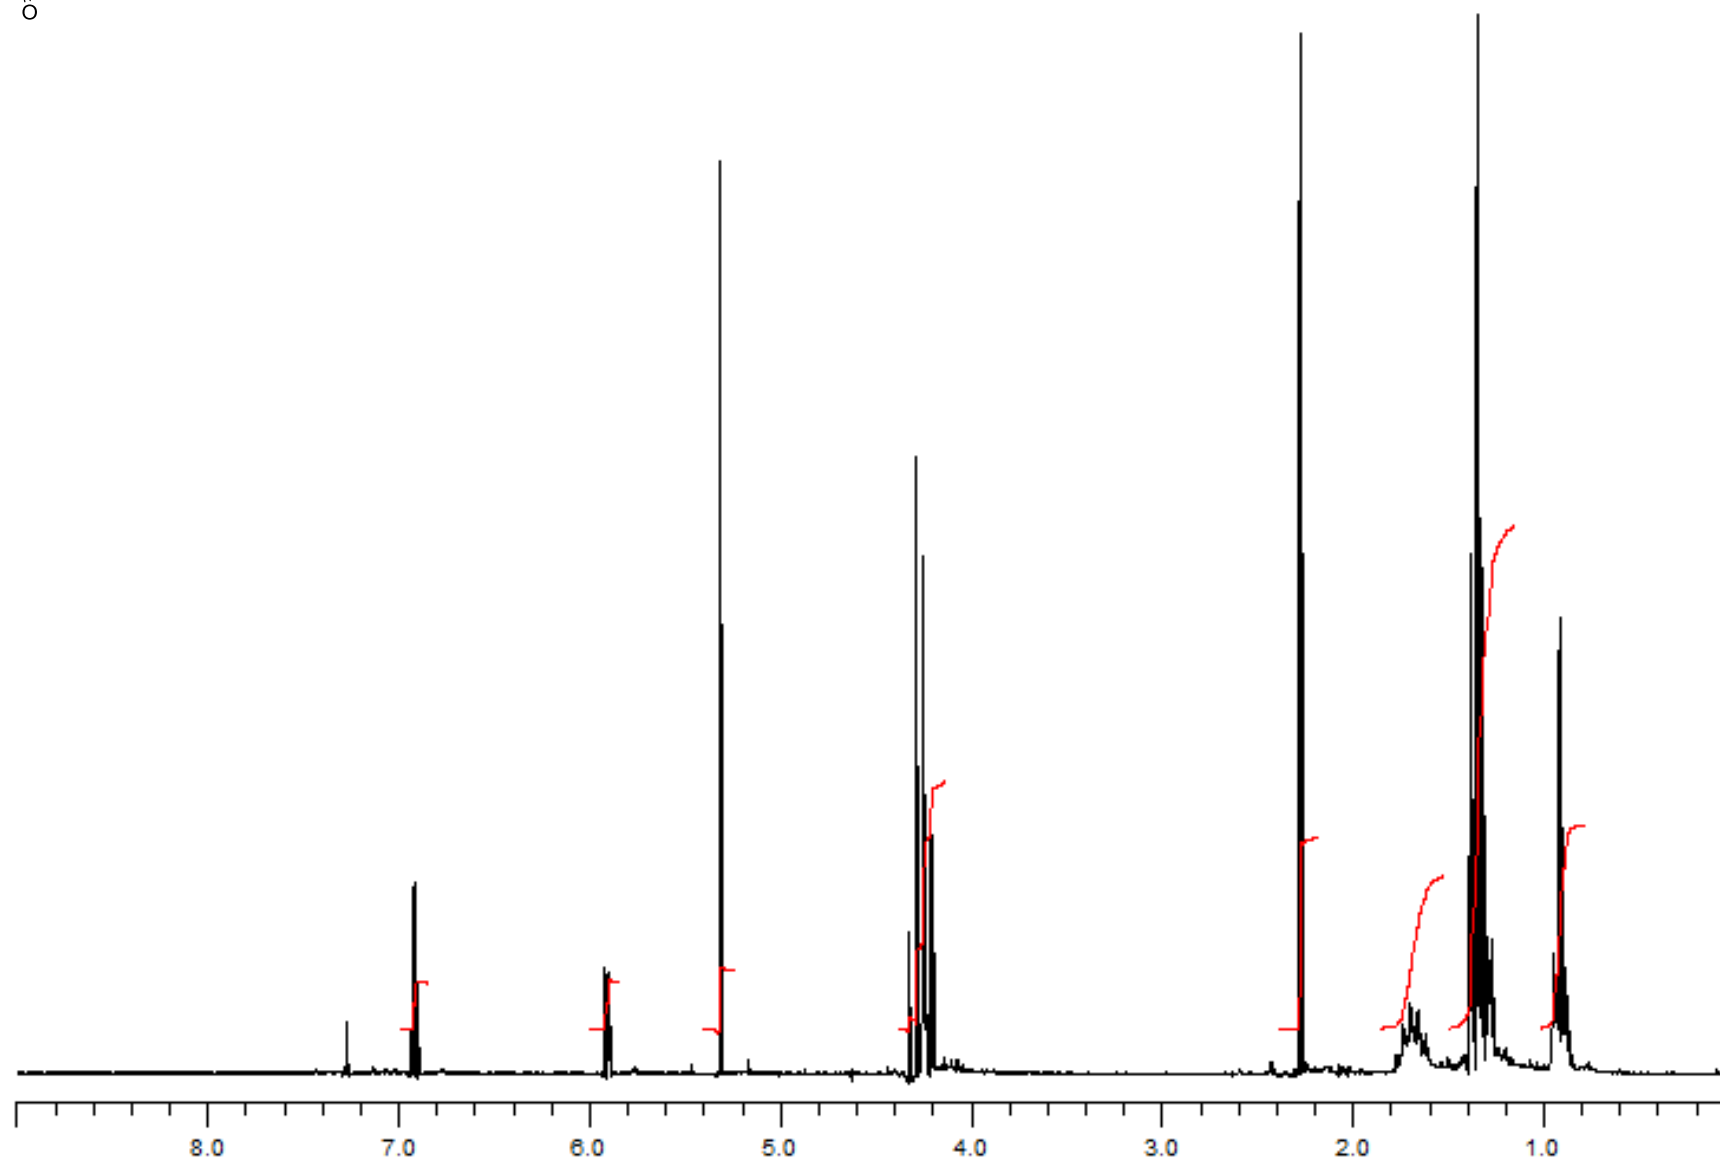

<sup>13</sup>C NMR Compound **6ab**.

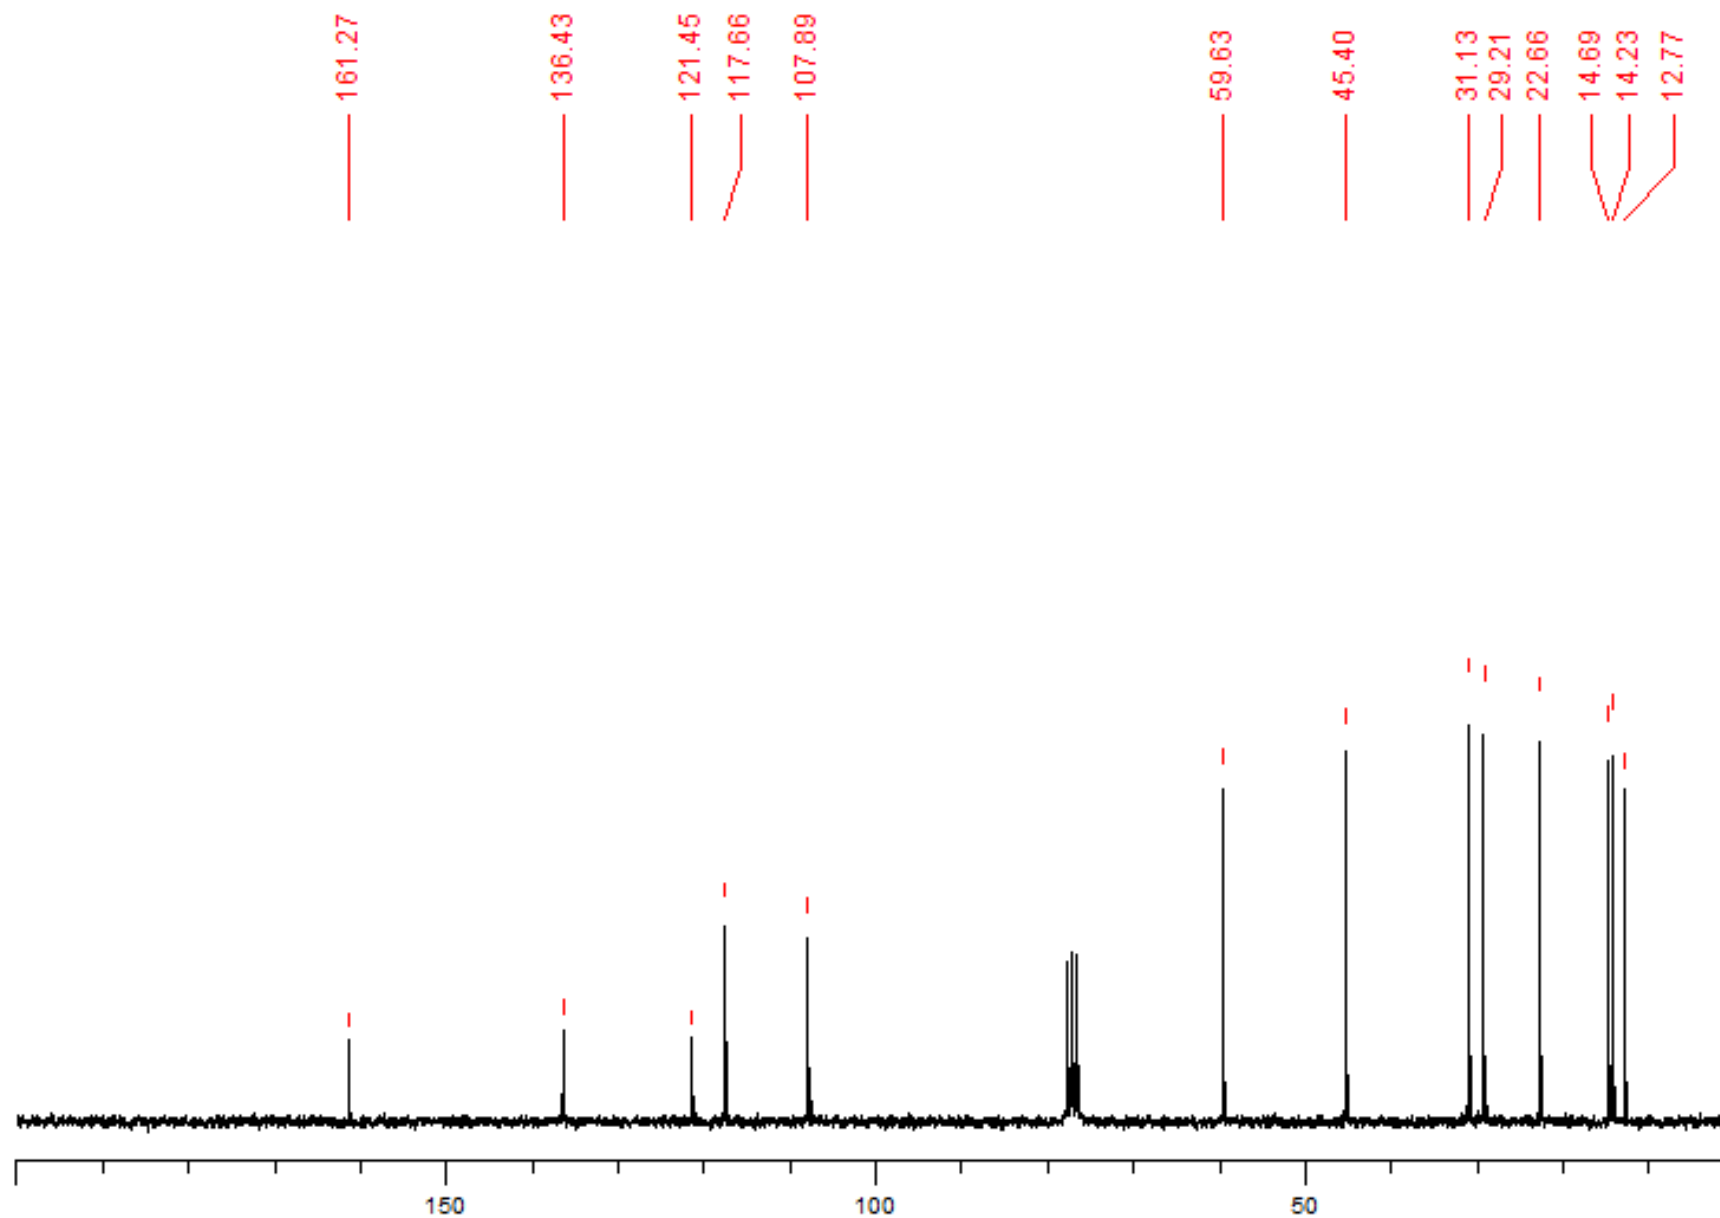

<sup>1</sup>H NMR Compound **6ac**.

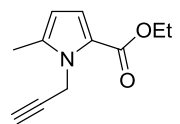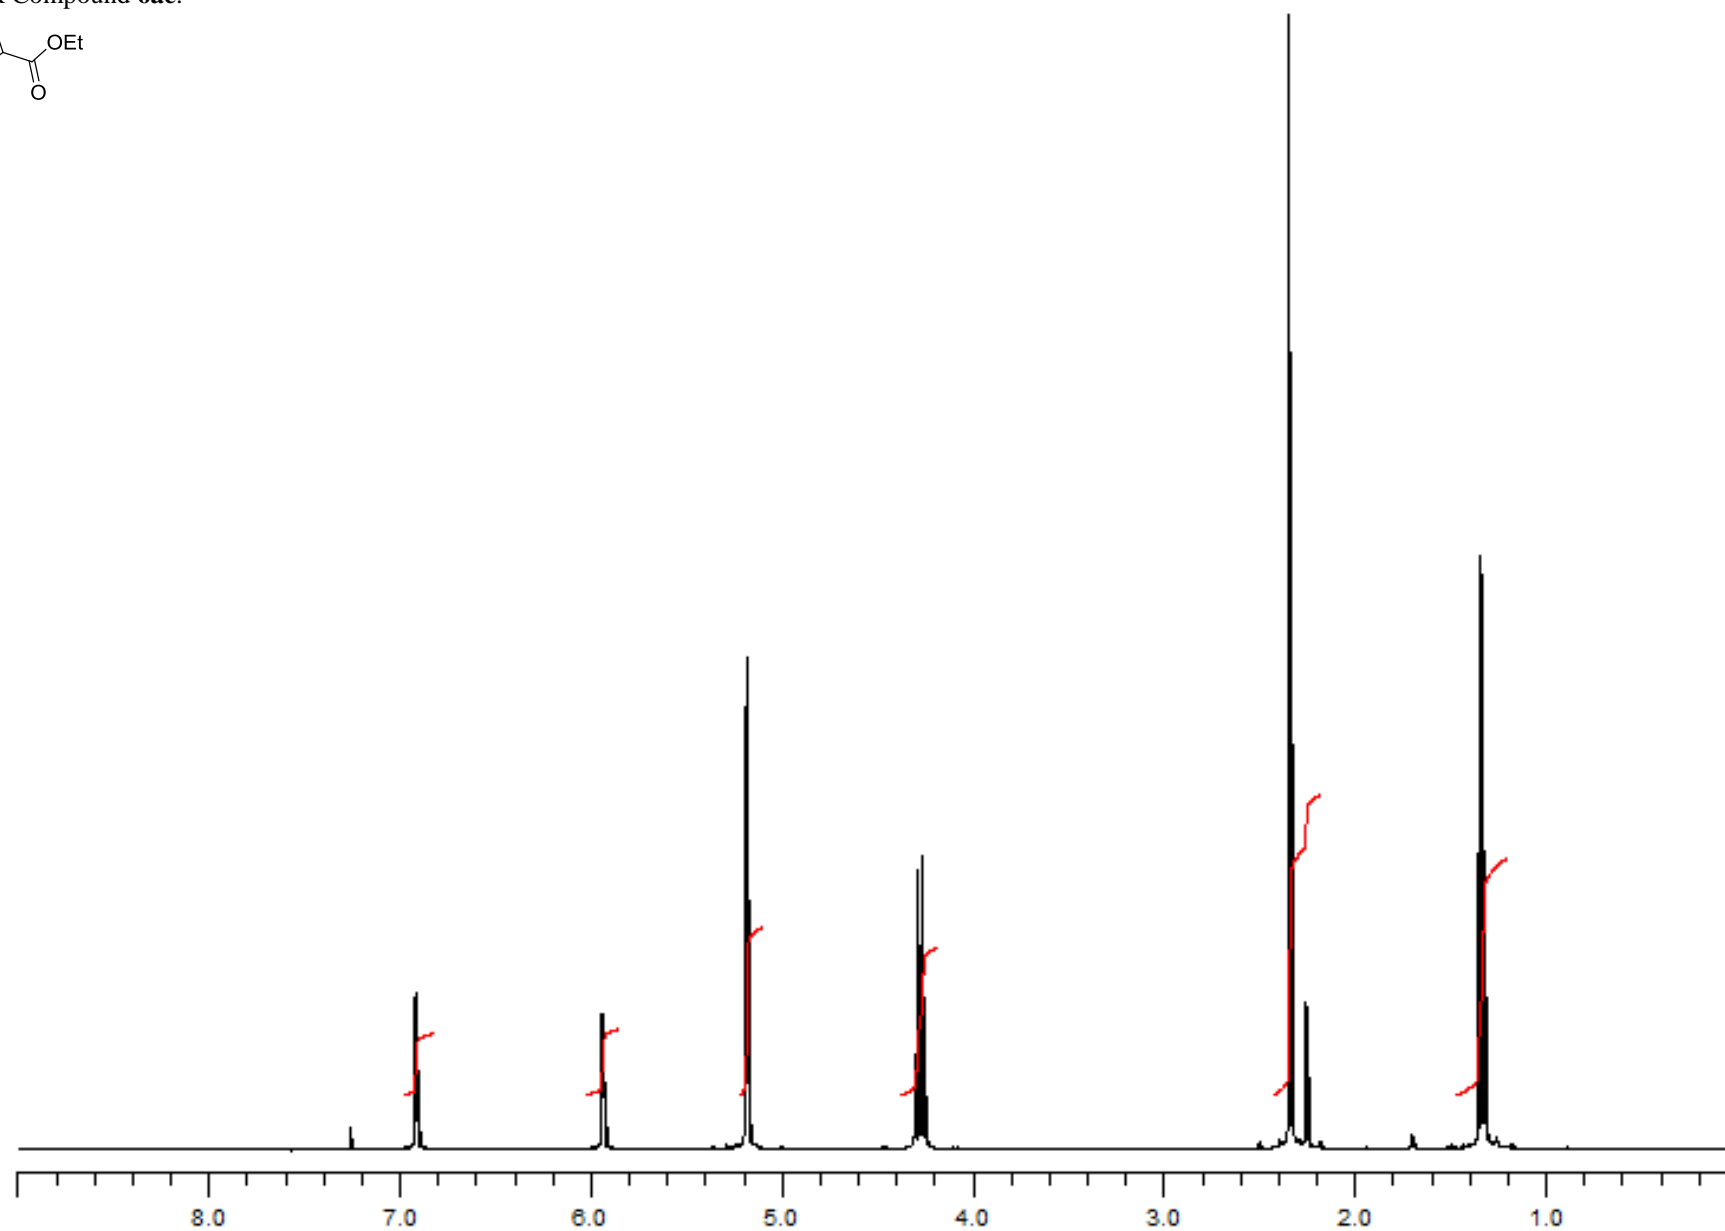

<sup>13</sup>C NMR Compound **6ac**.

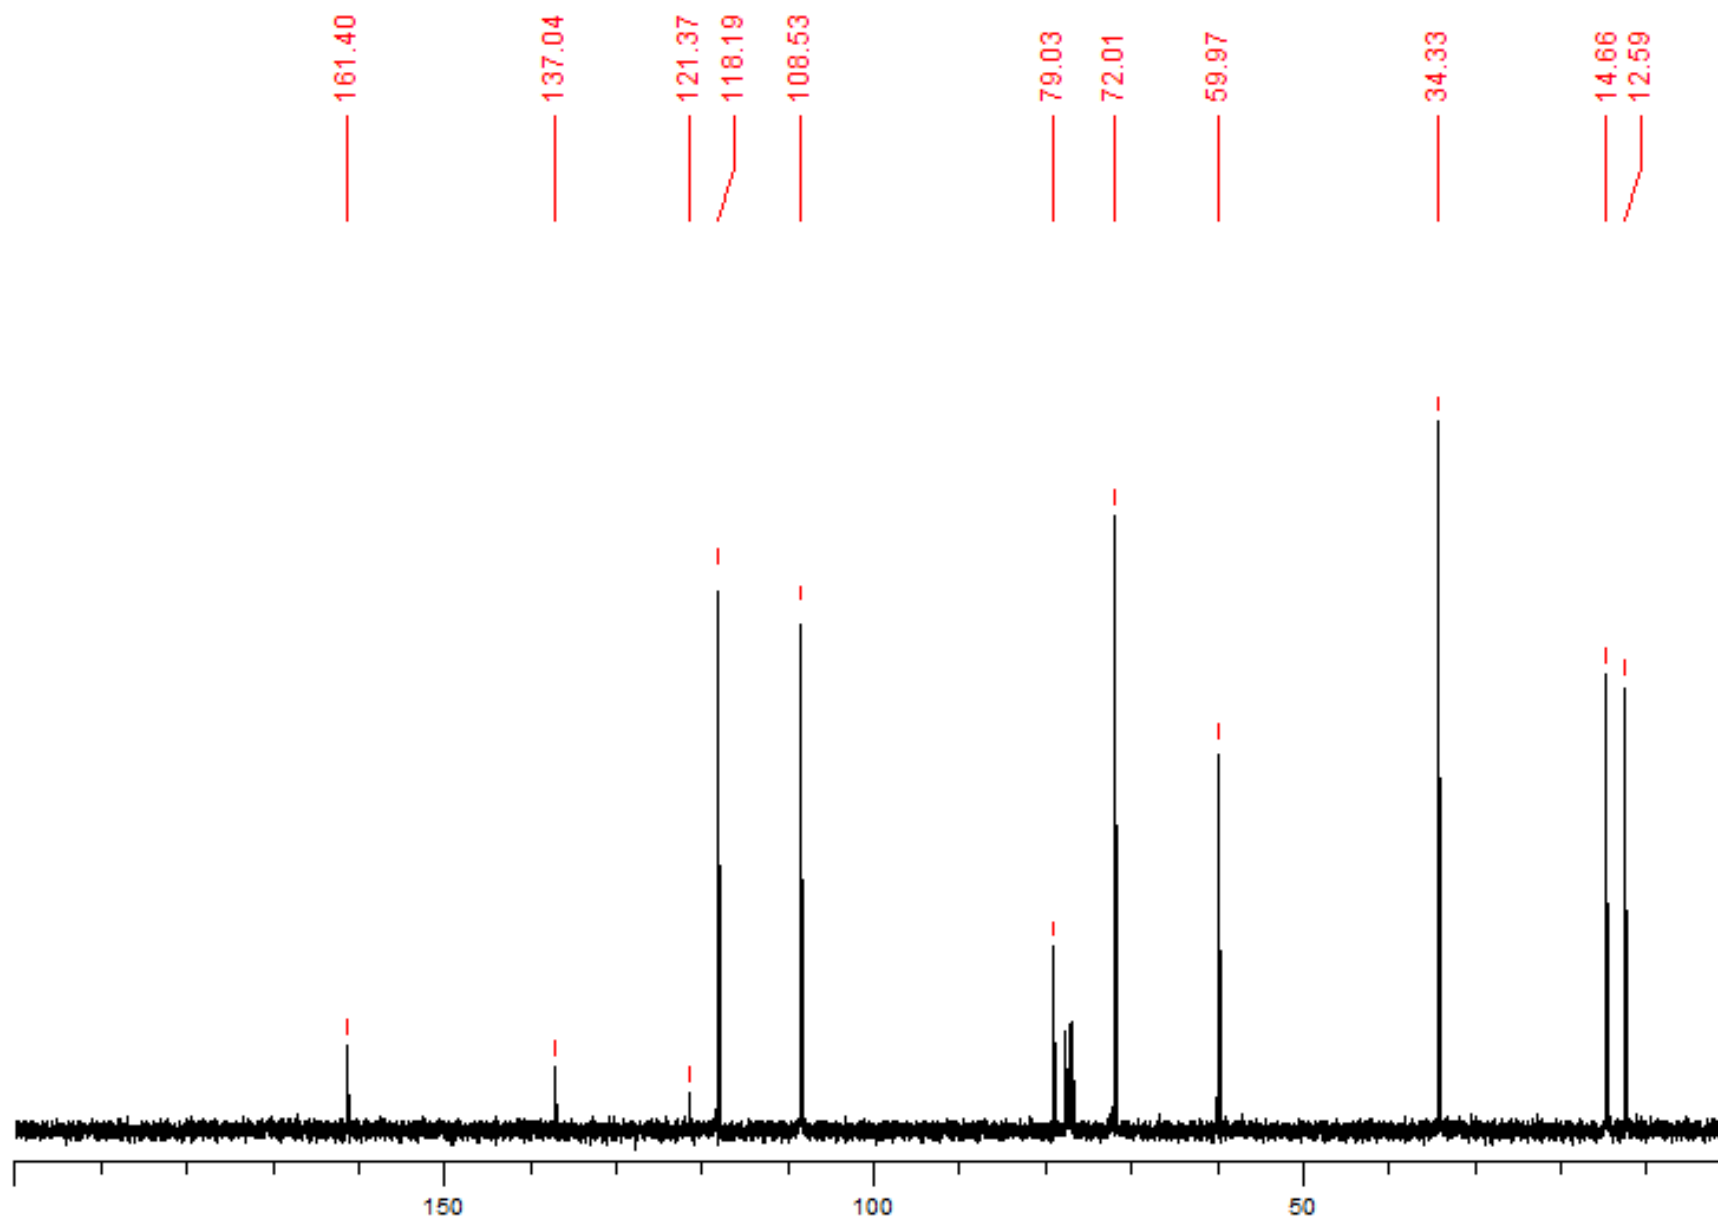

<sup>1</sup>H NMR Compound **6ba**.

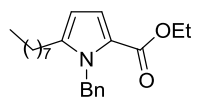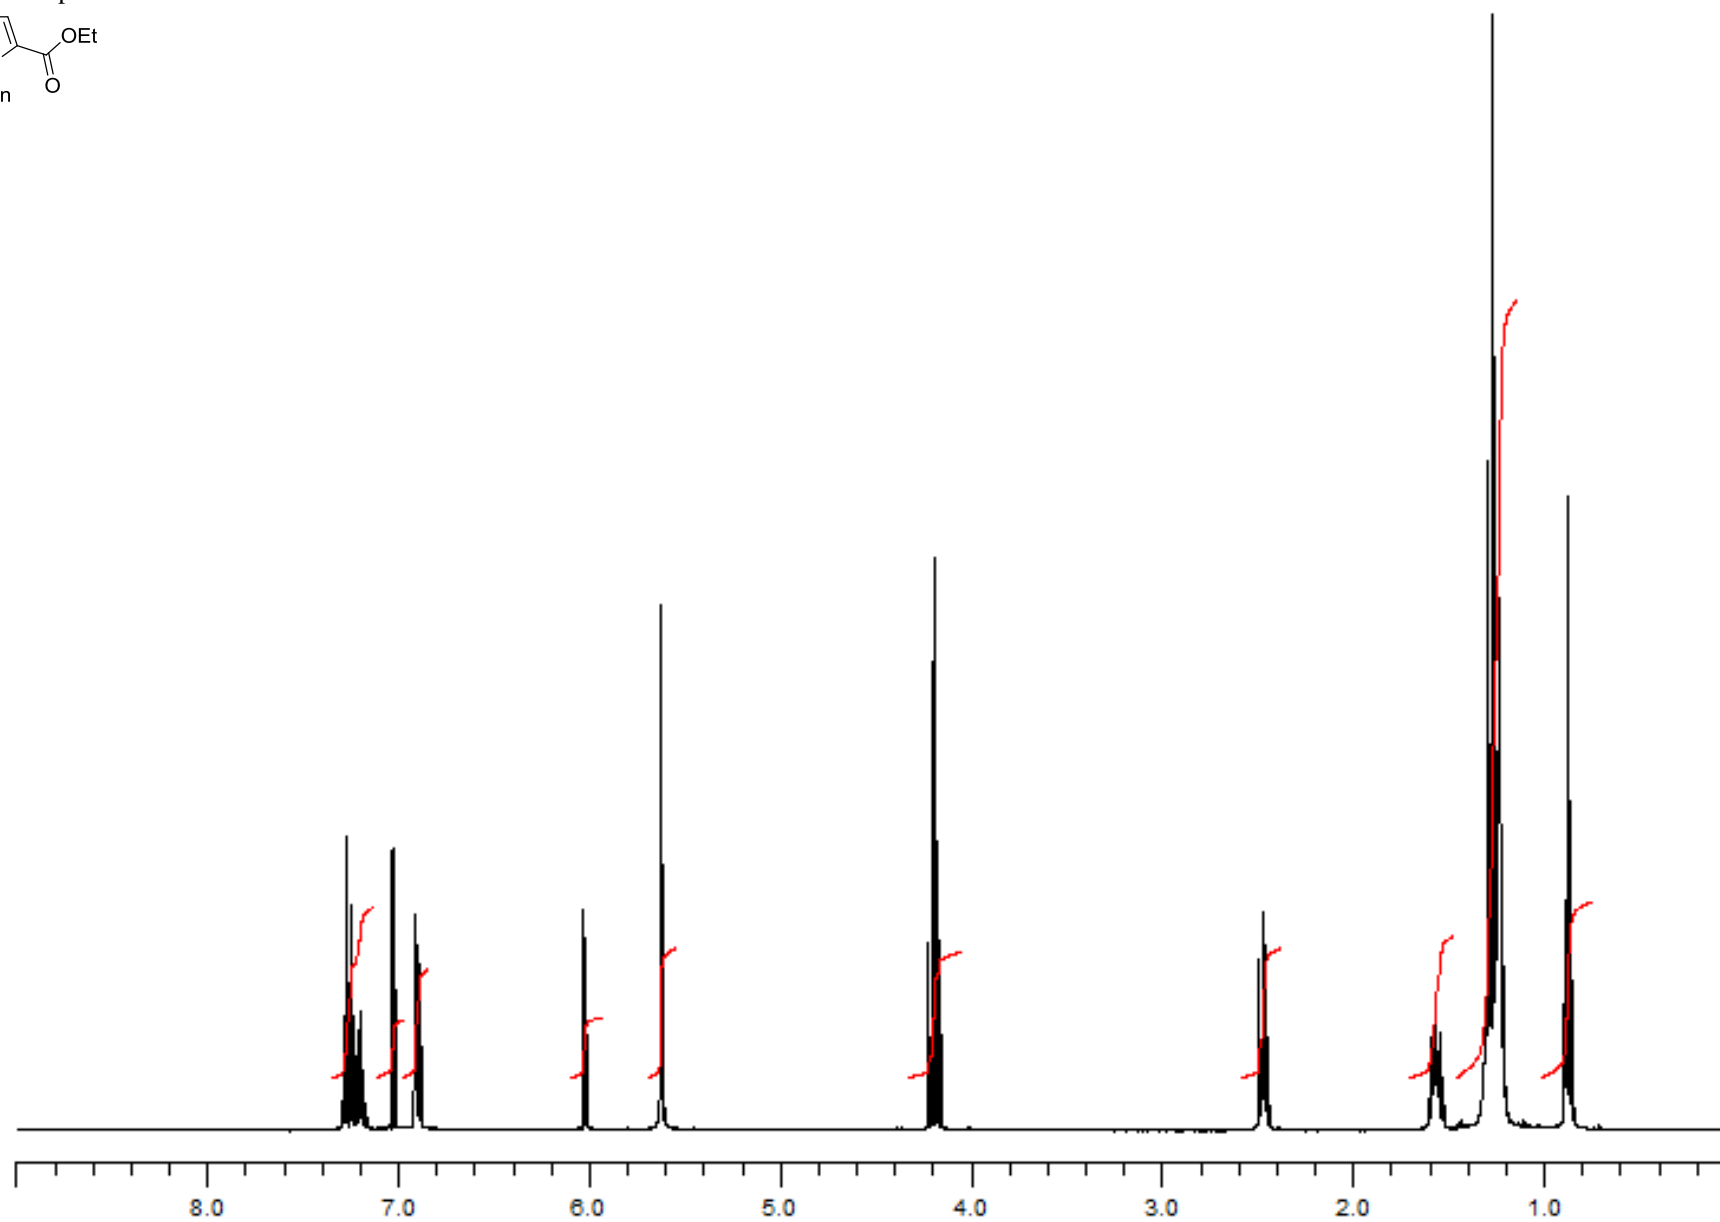

$^{13}\text{C}$  NMR Compound **6ba**.

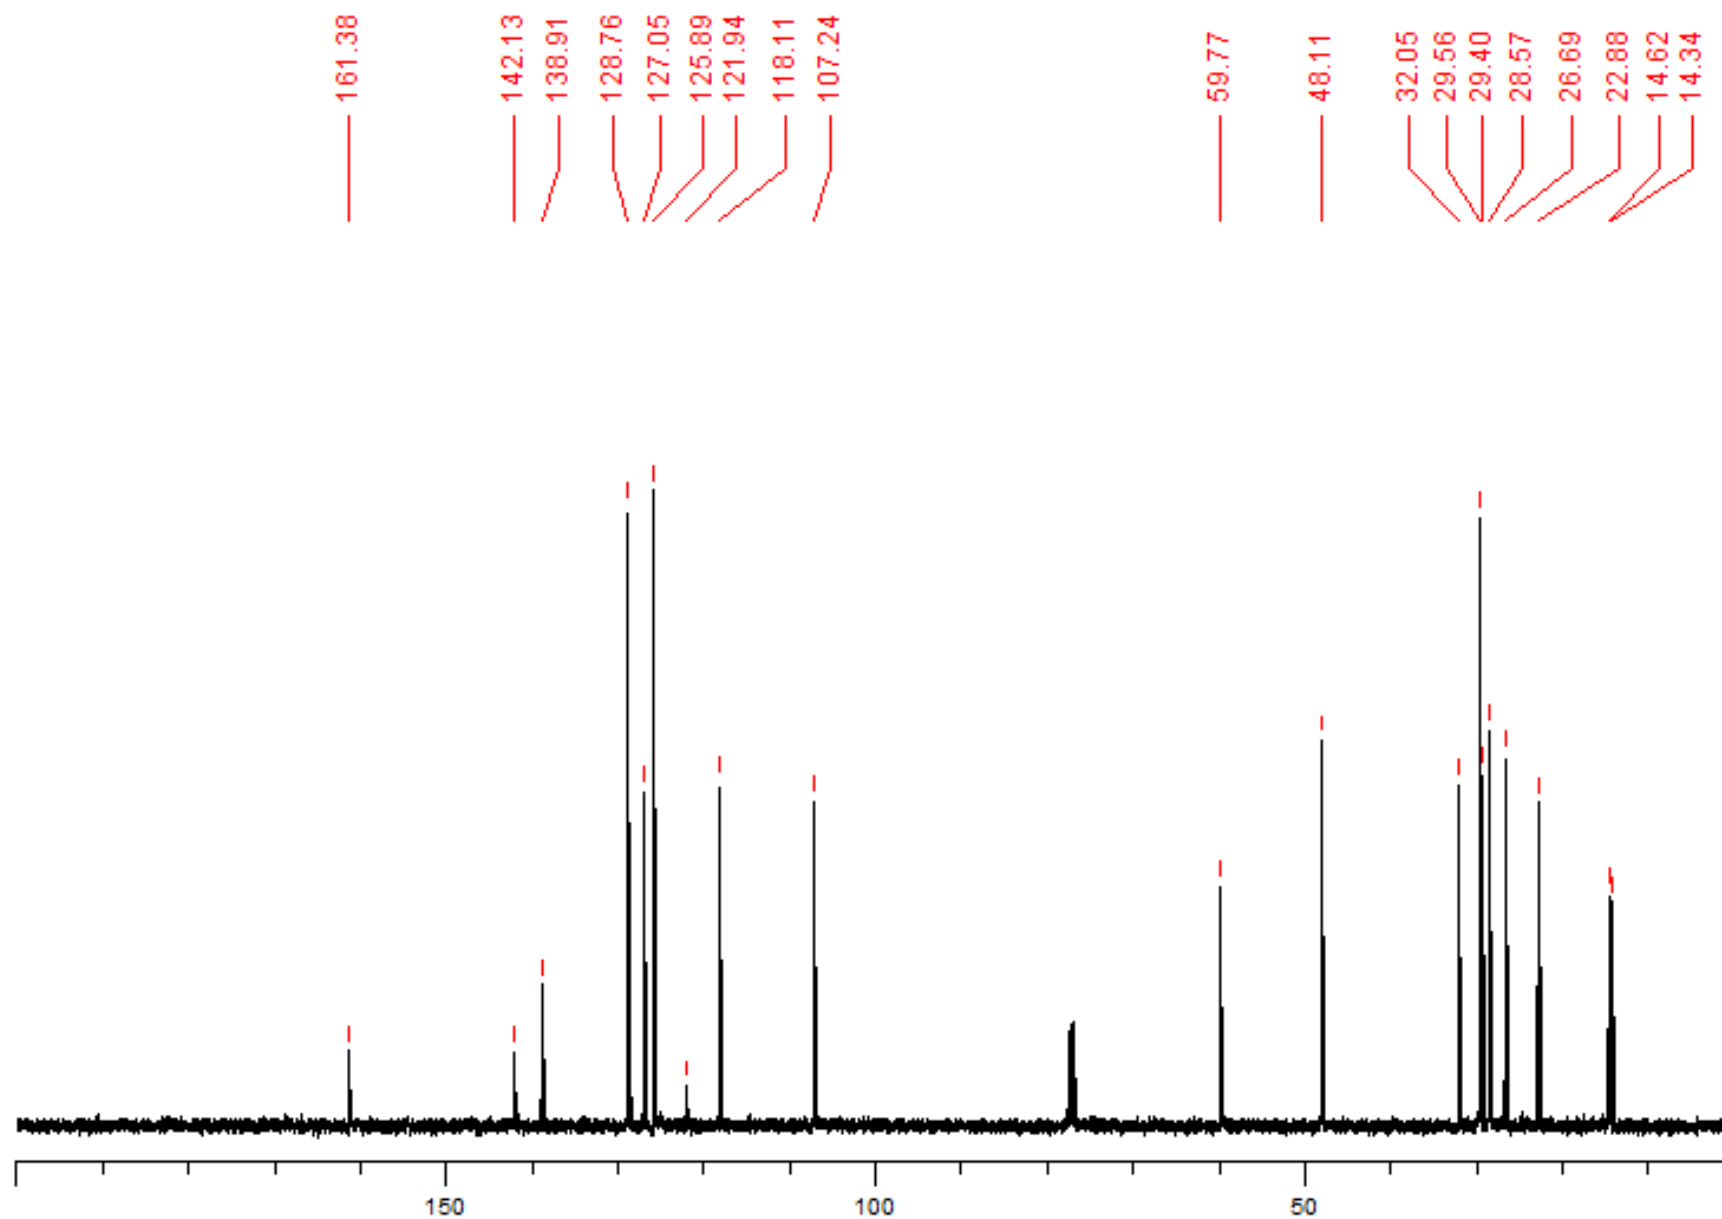



<sup>1</sup>H NMR Compound **6cd**.

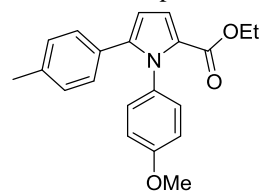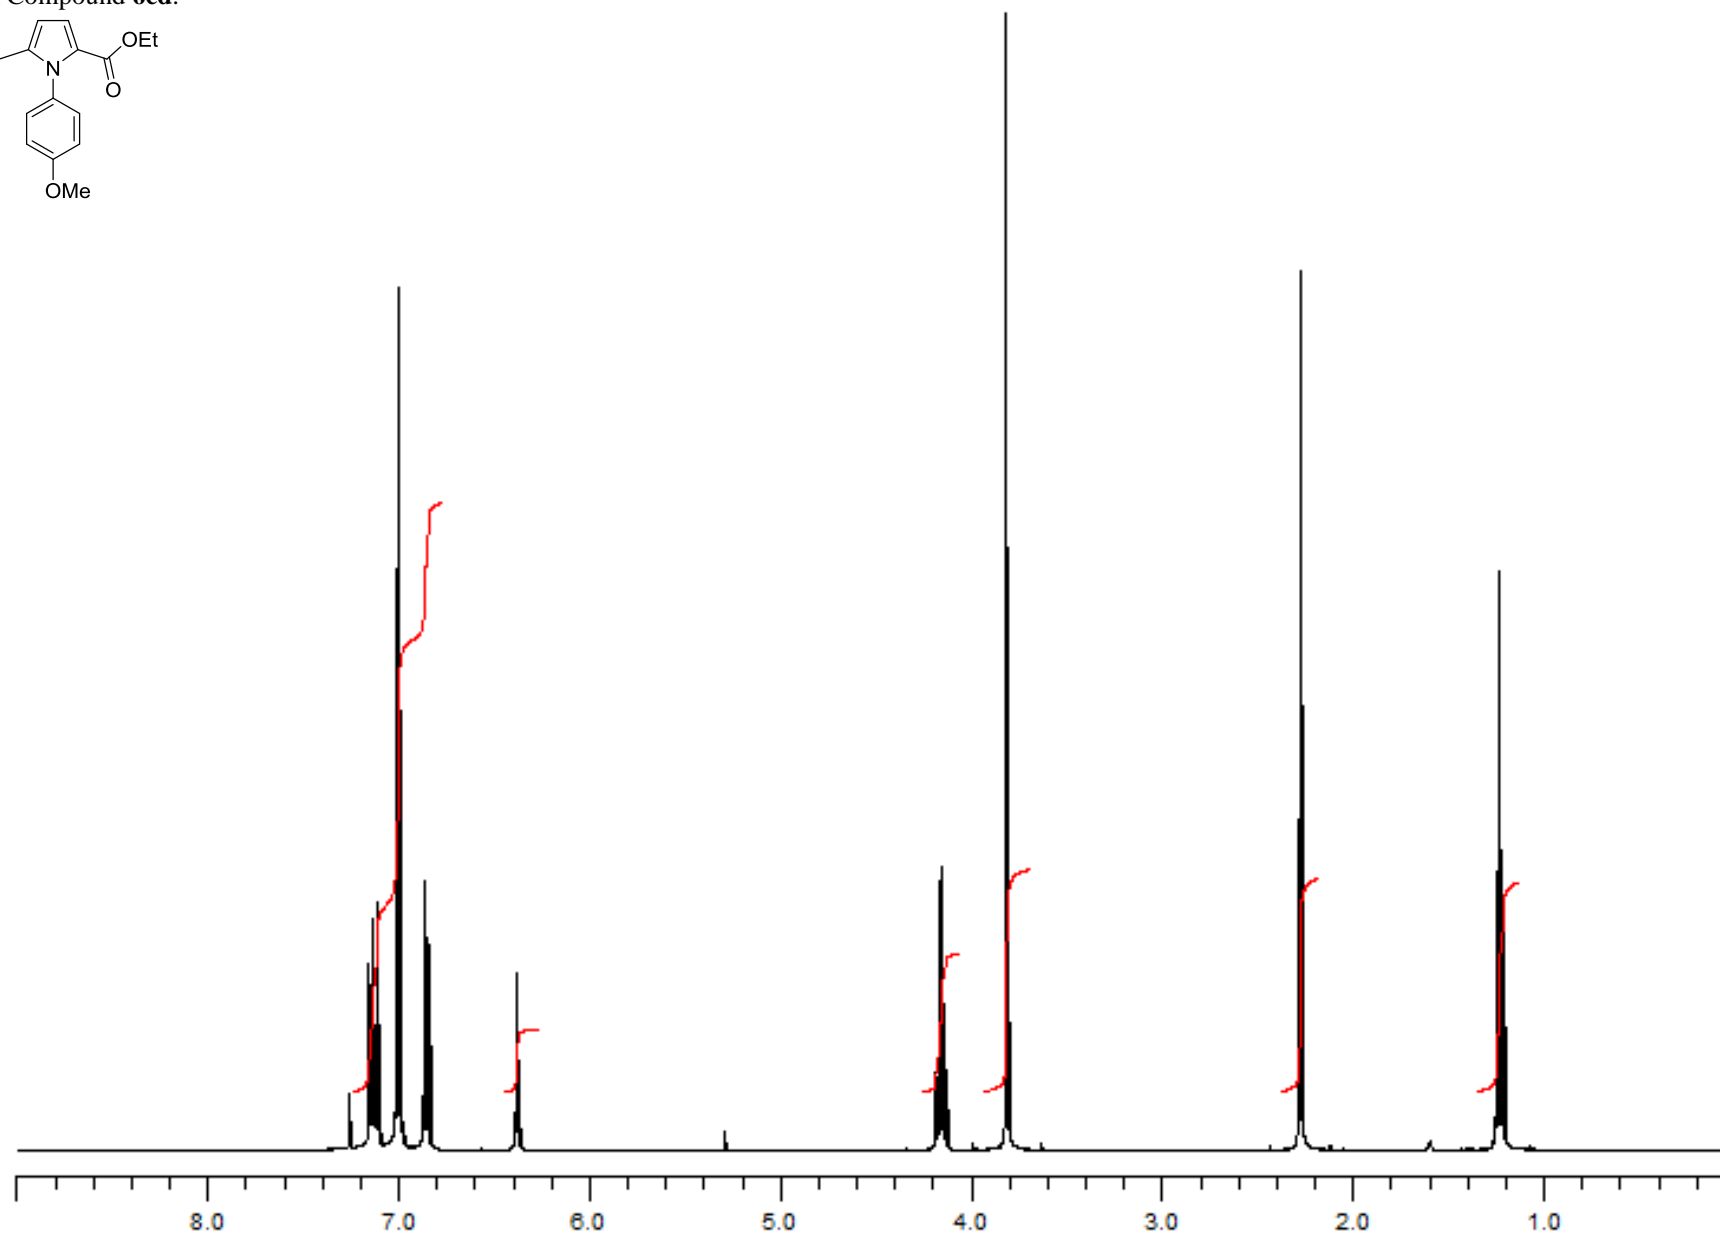

$^{13}\text{C}$  NMR Compound **6cd**.

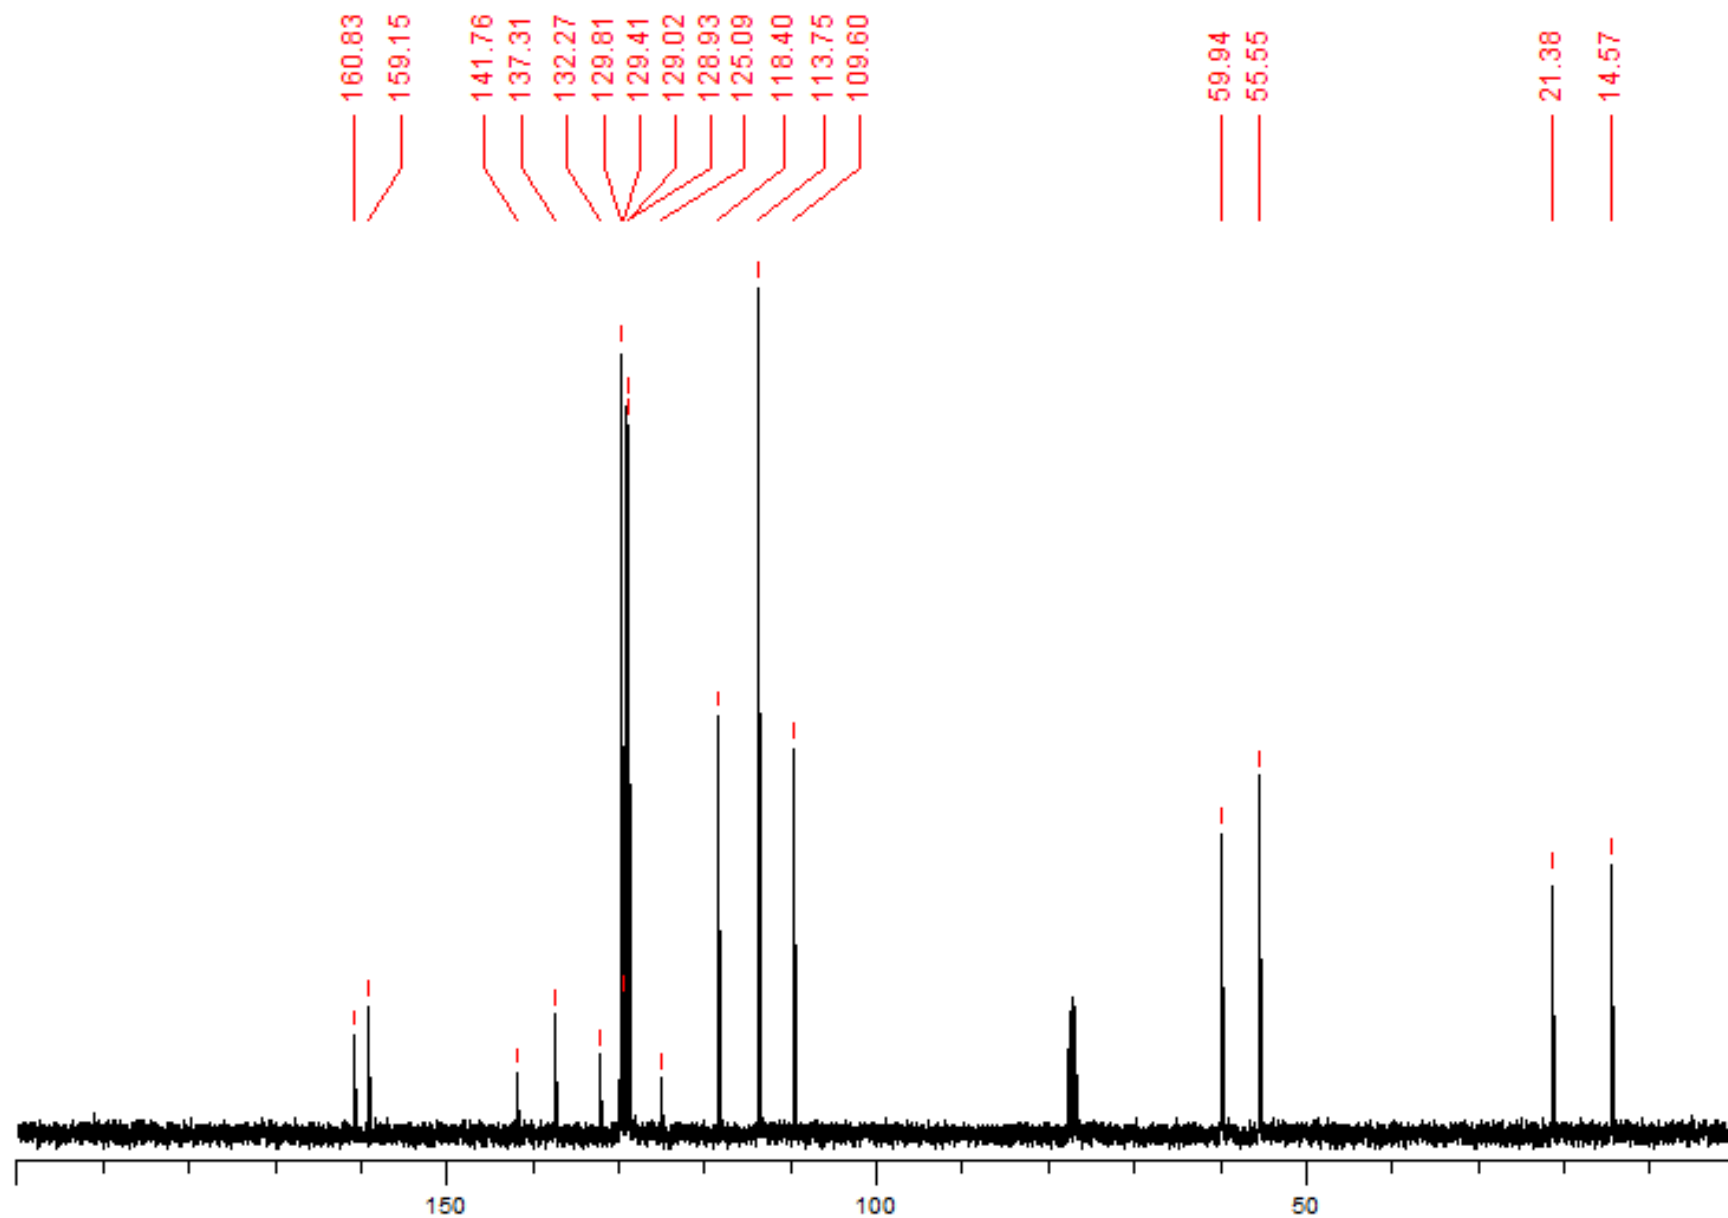

<sup>1</sup>H NMR Compound **6ce**.

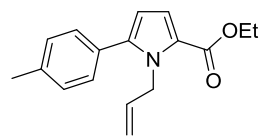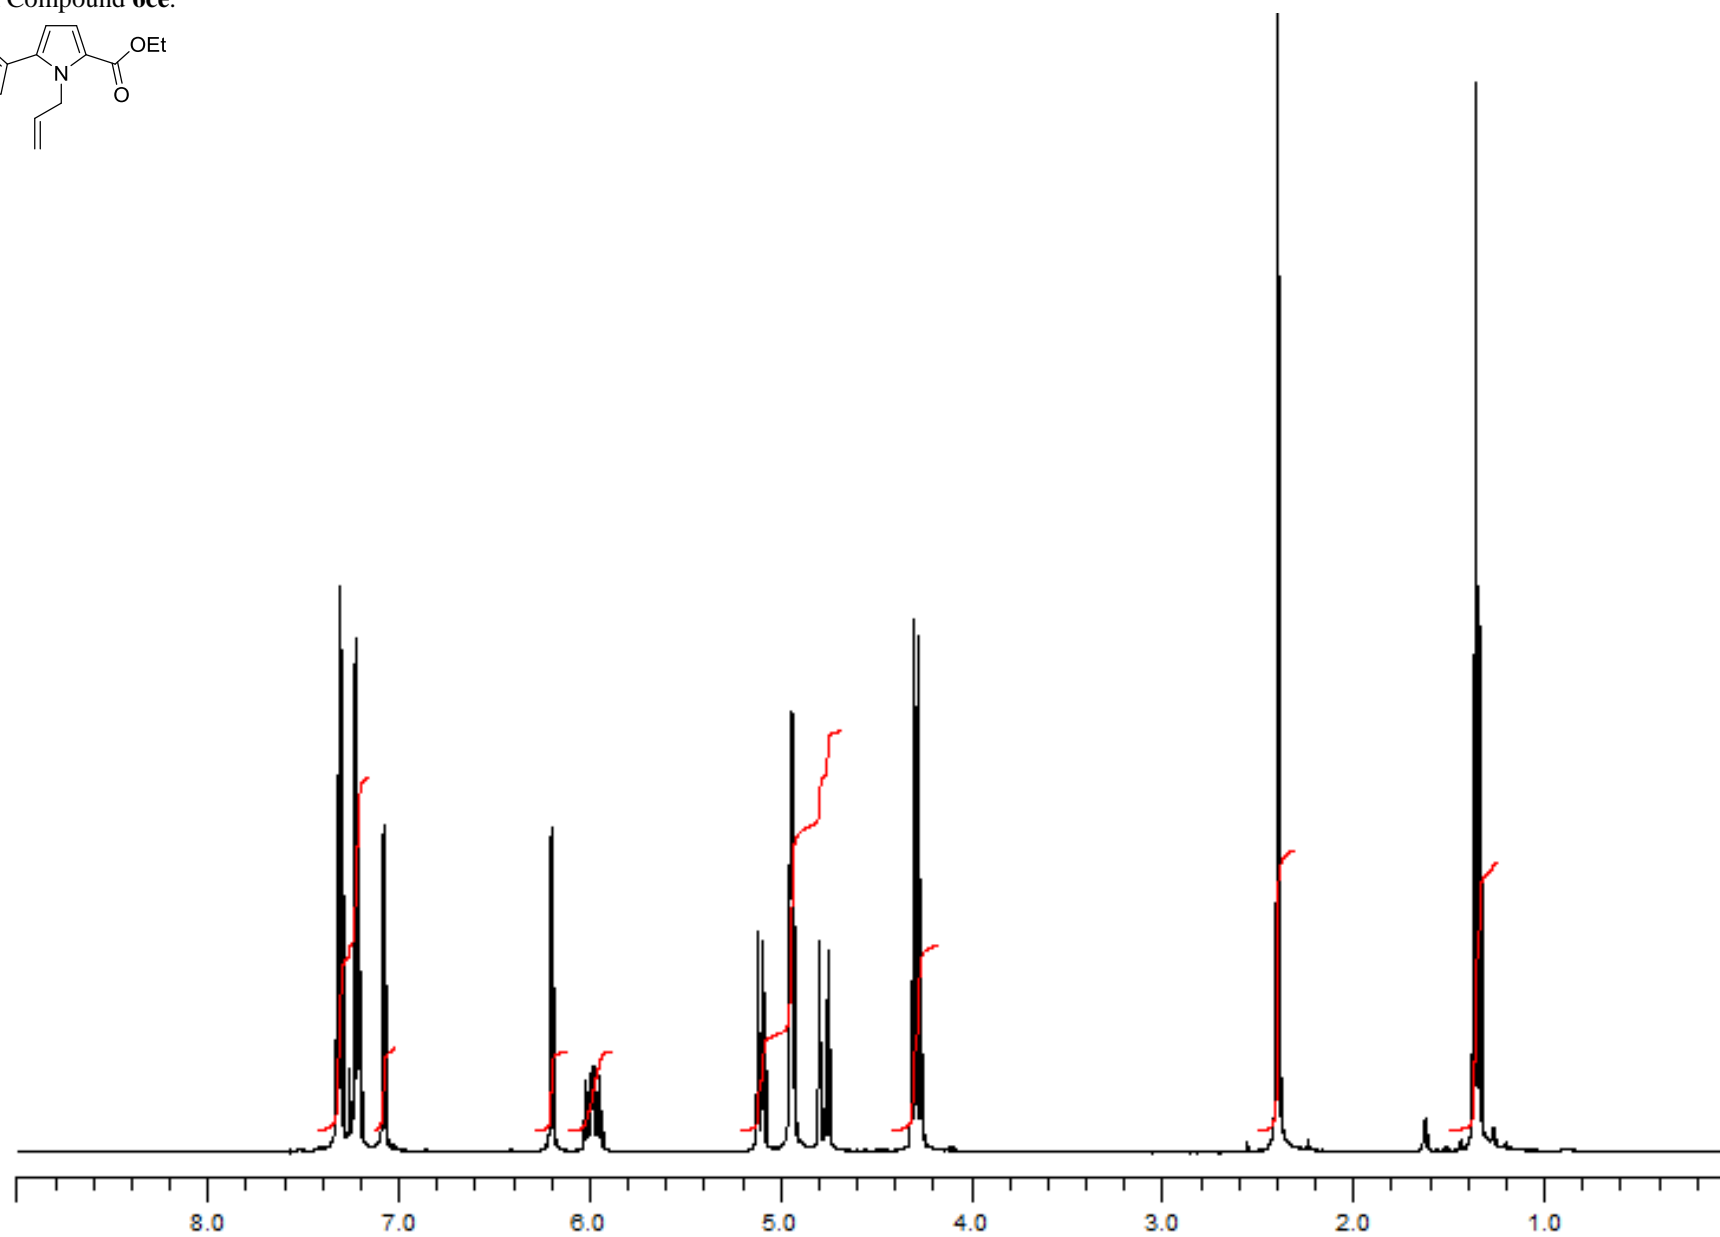

<sup>13</sup>C NMR Compound **6ce**.

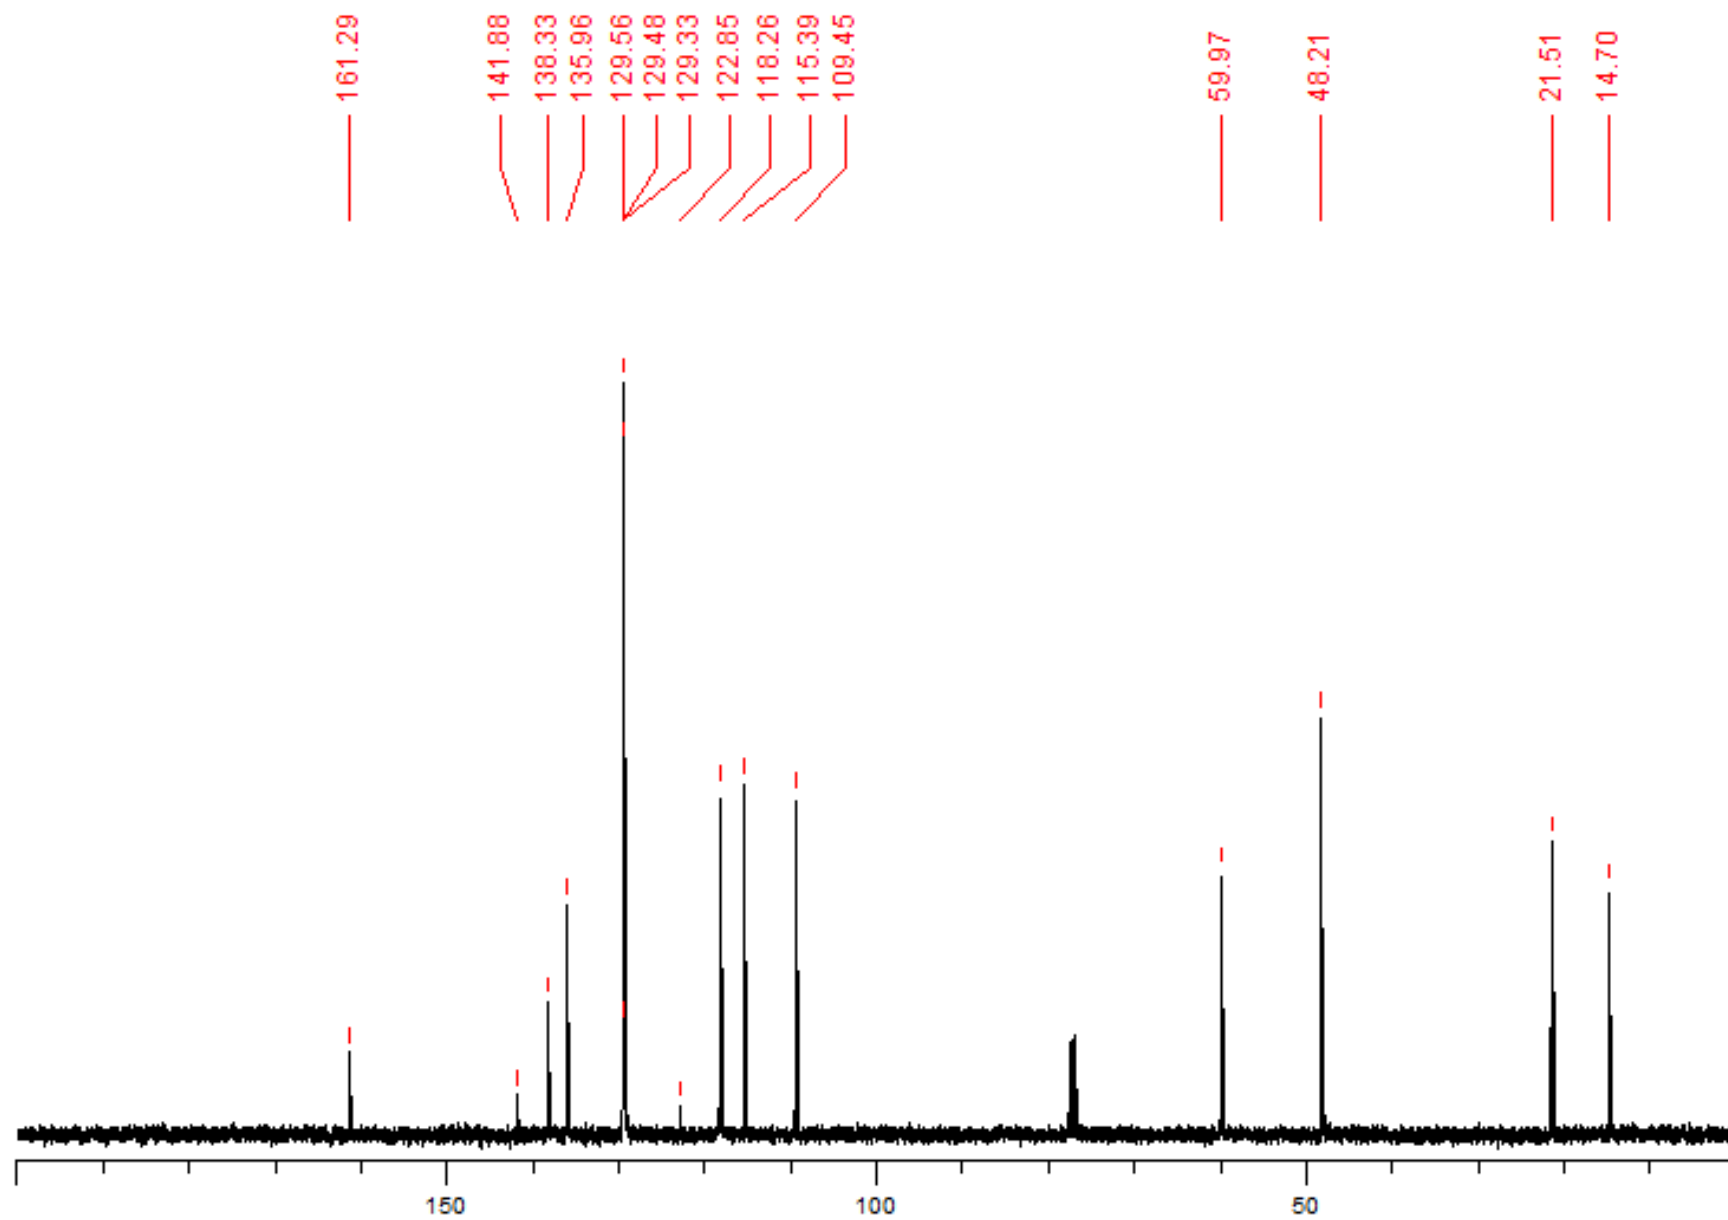

<sup>1</sup>H NMR Compound **6df**.

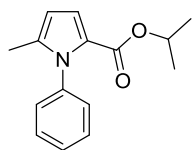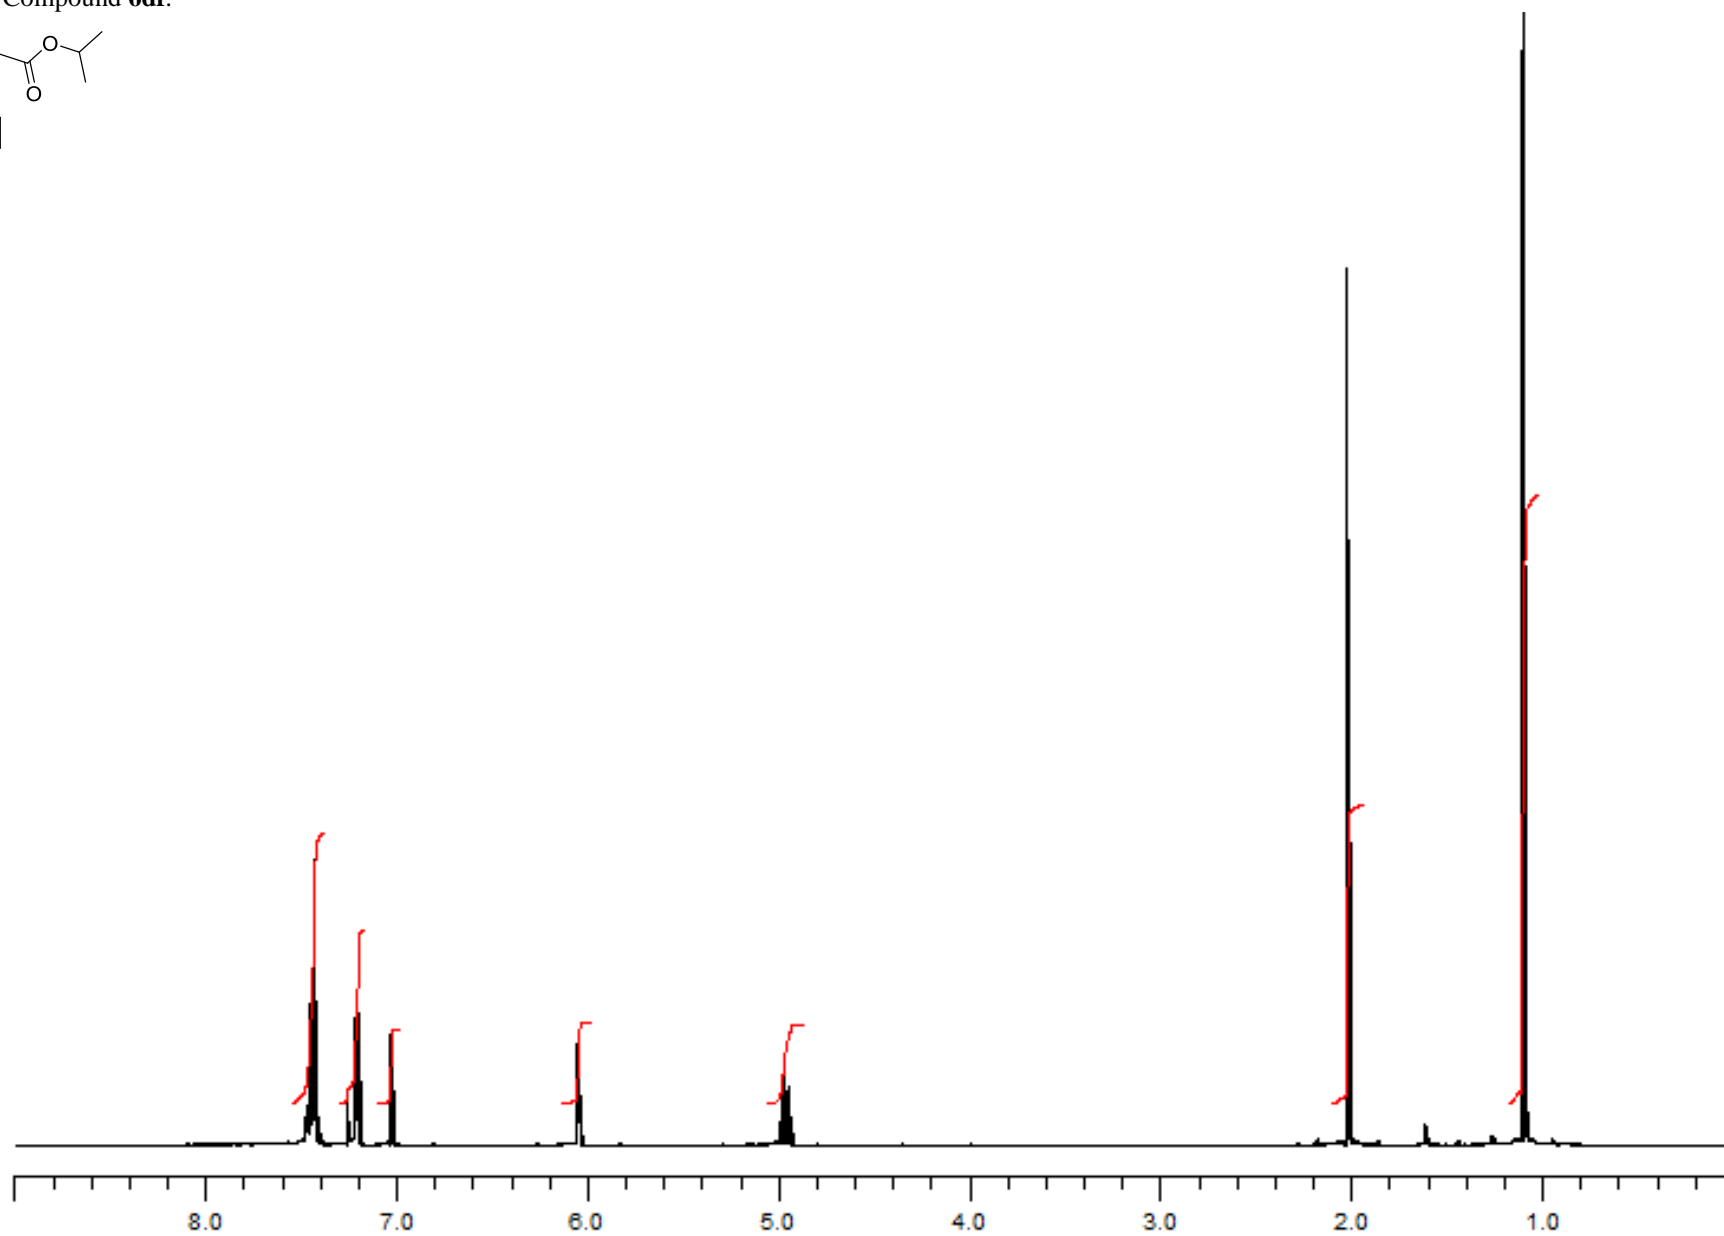

$^{13}\text{C}$  NMR Compound **6df**.

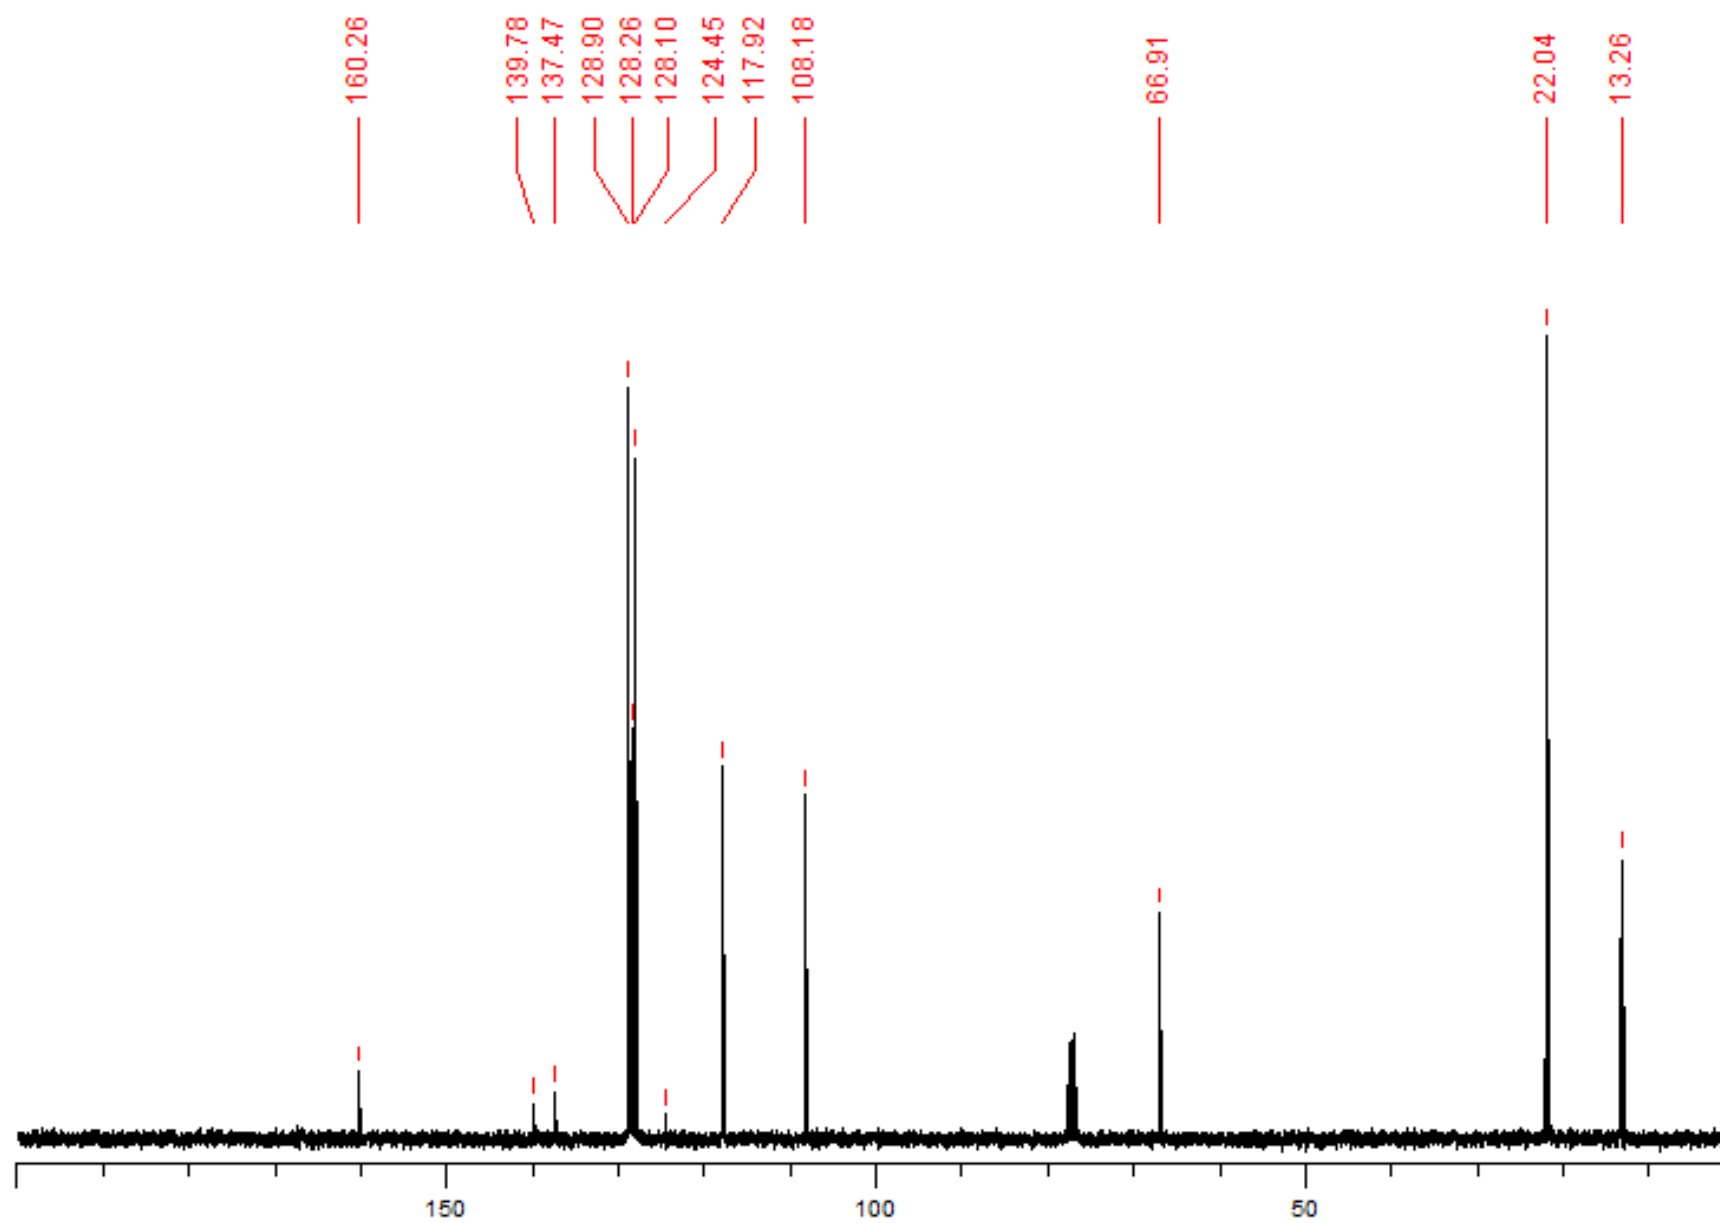

<sup>1</sup>H NMR Compound **6eg**.

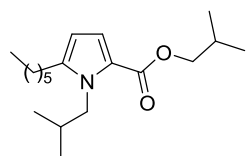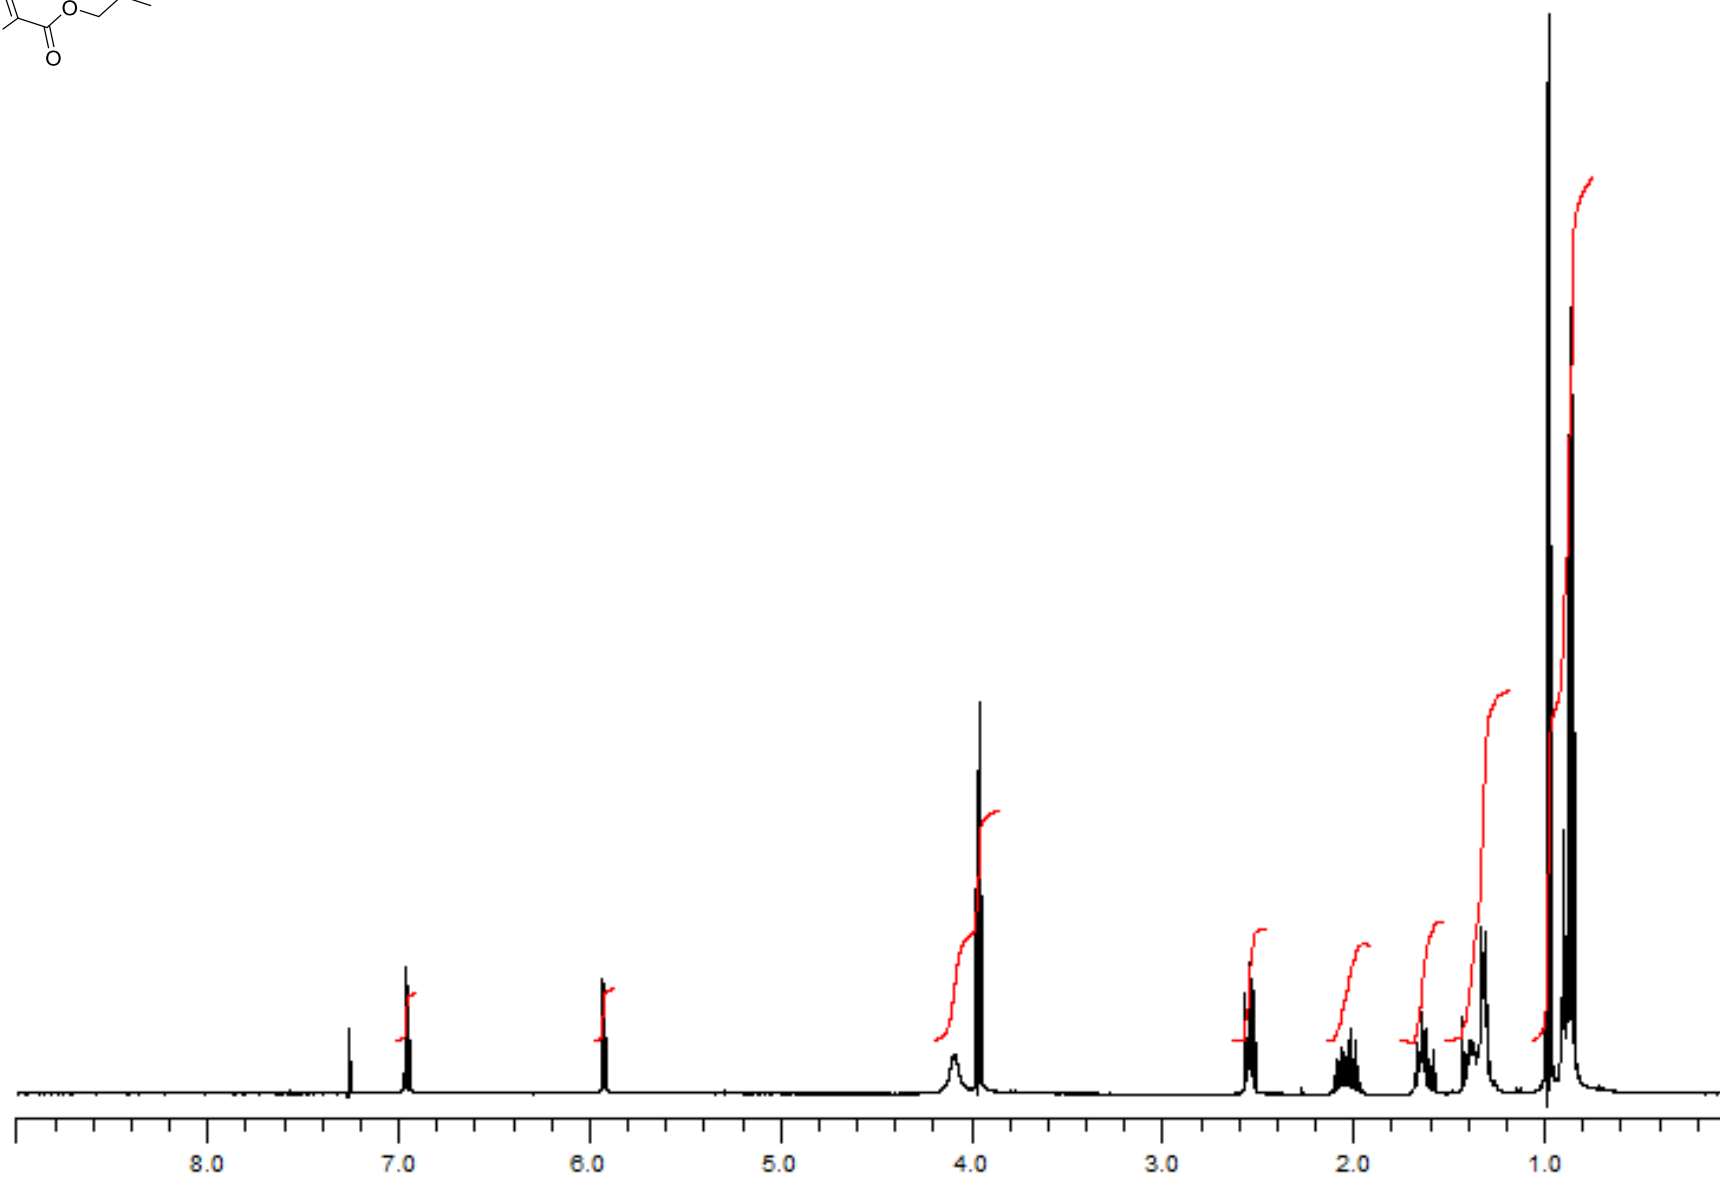

$^{13}\text{C}$  NMR Compound **6eg**.

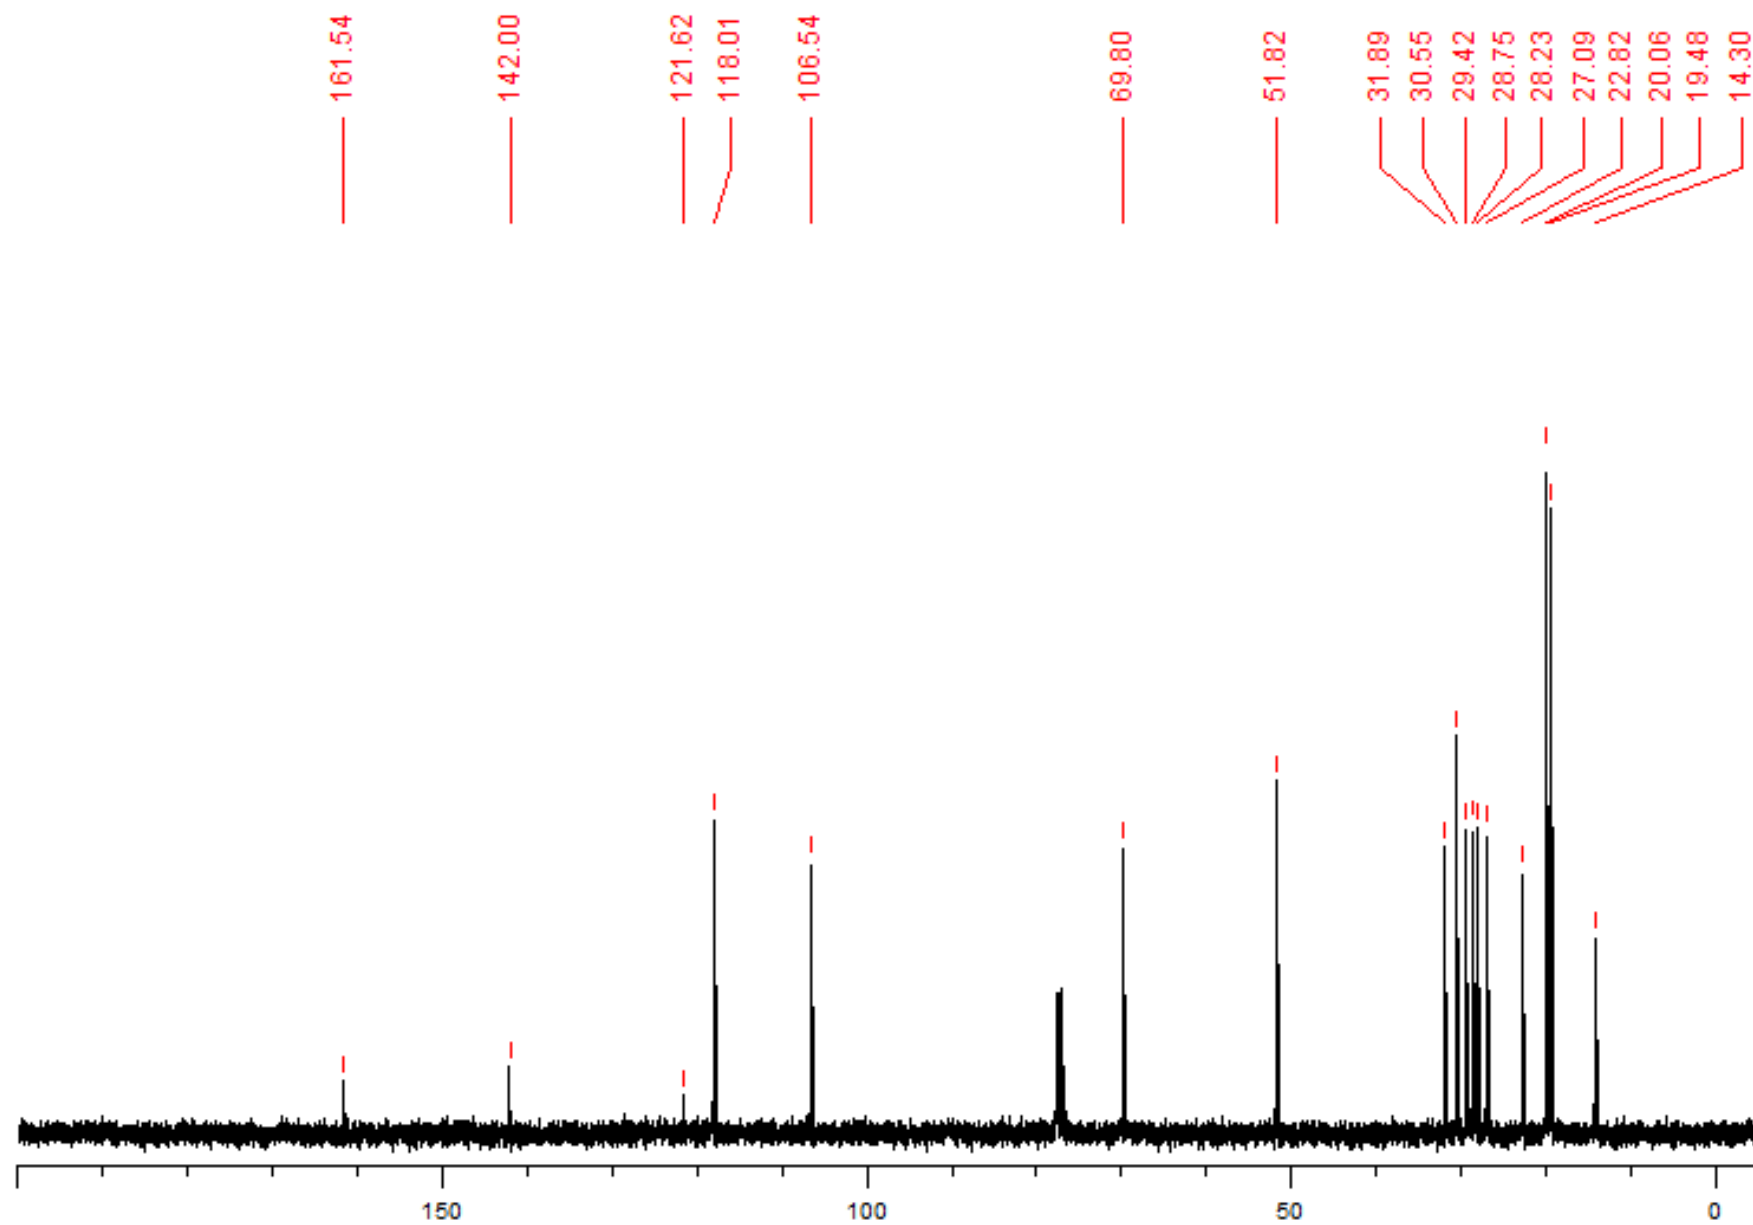



<sup>1</sup>H NMR Compound **6fh**.

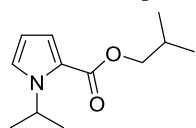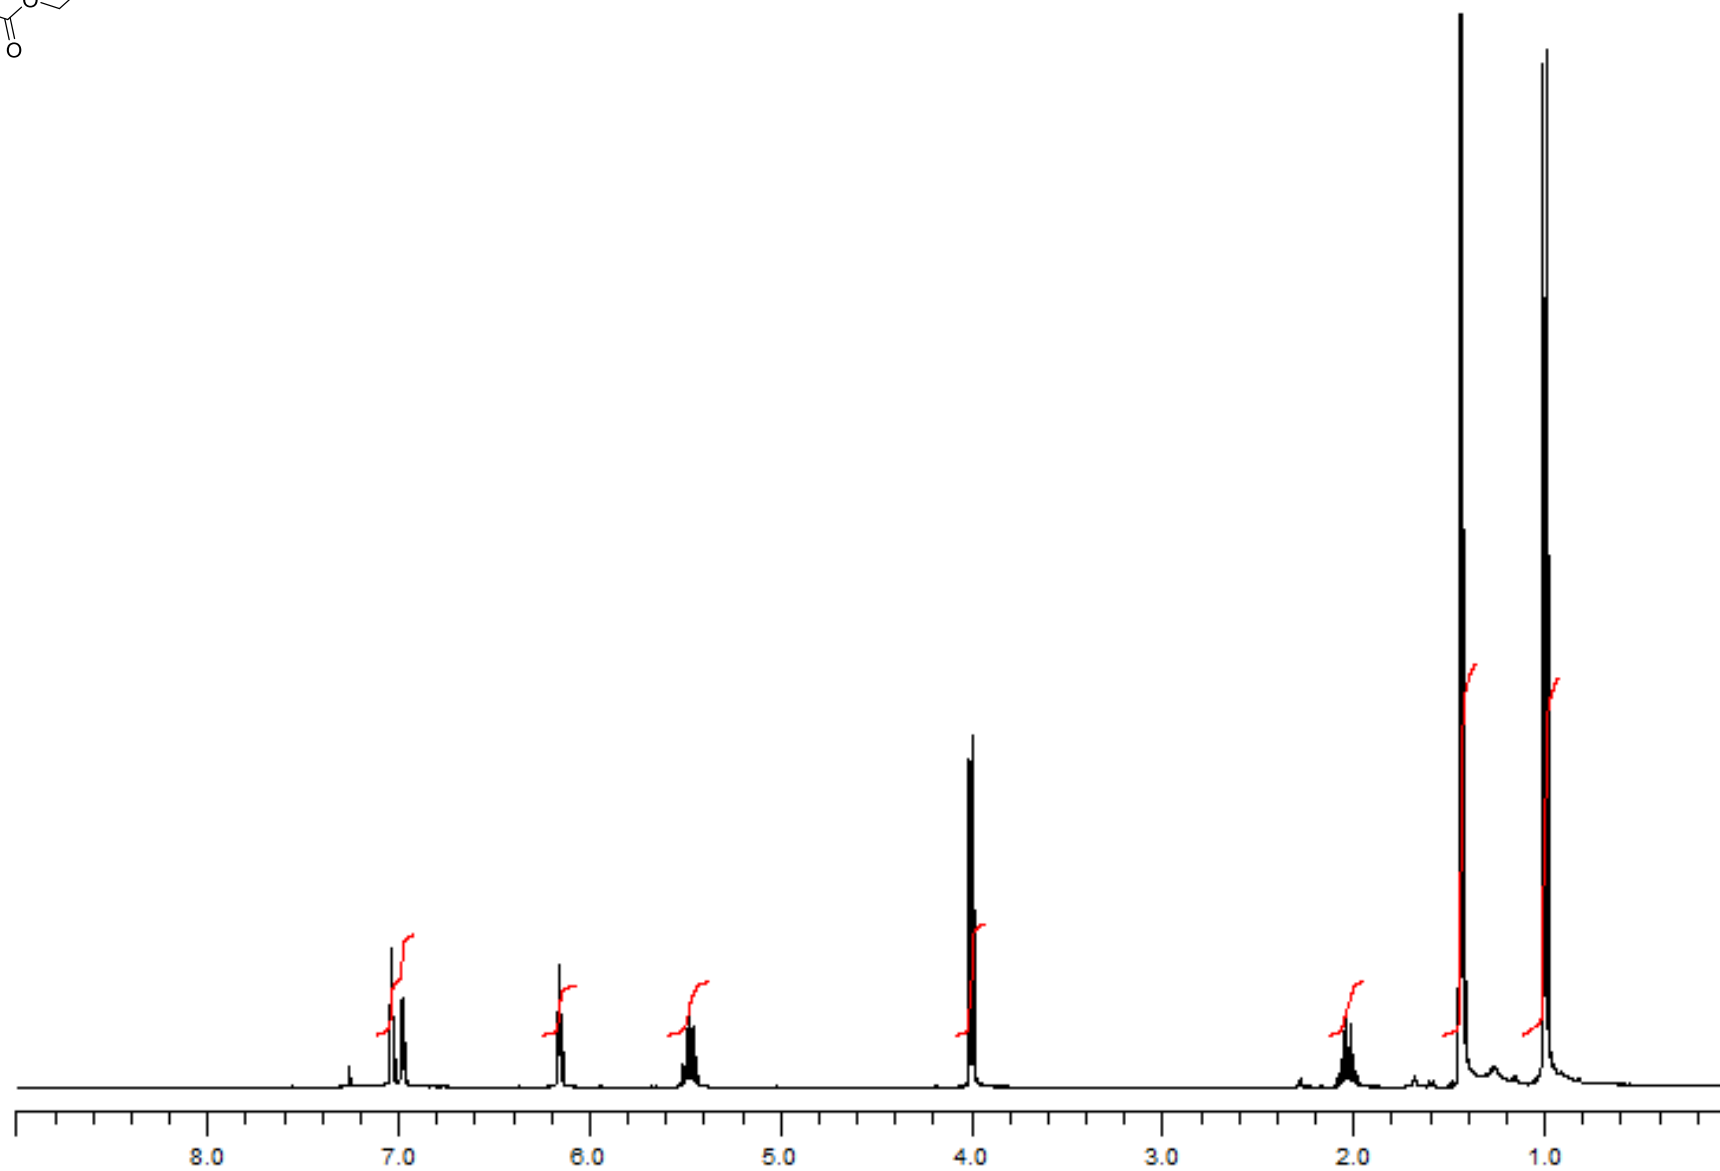

$^{13}\text{C}$  NMR Compound **6f**.

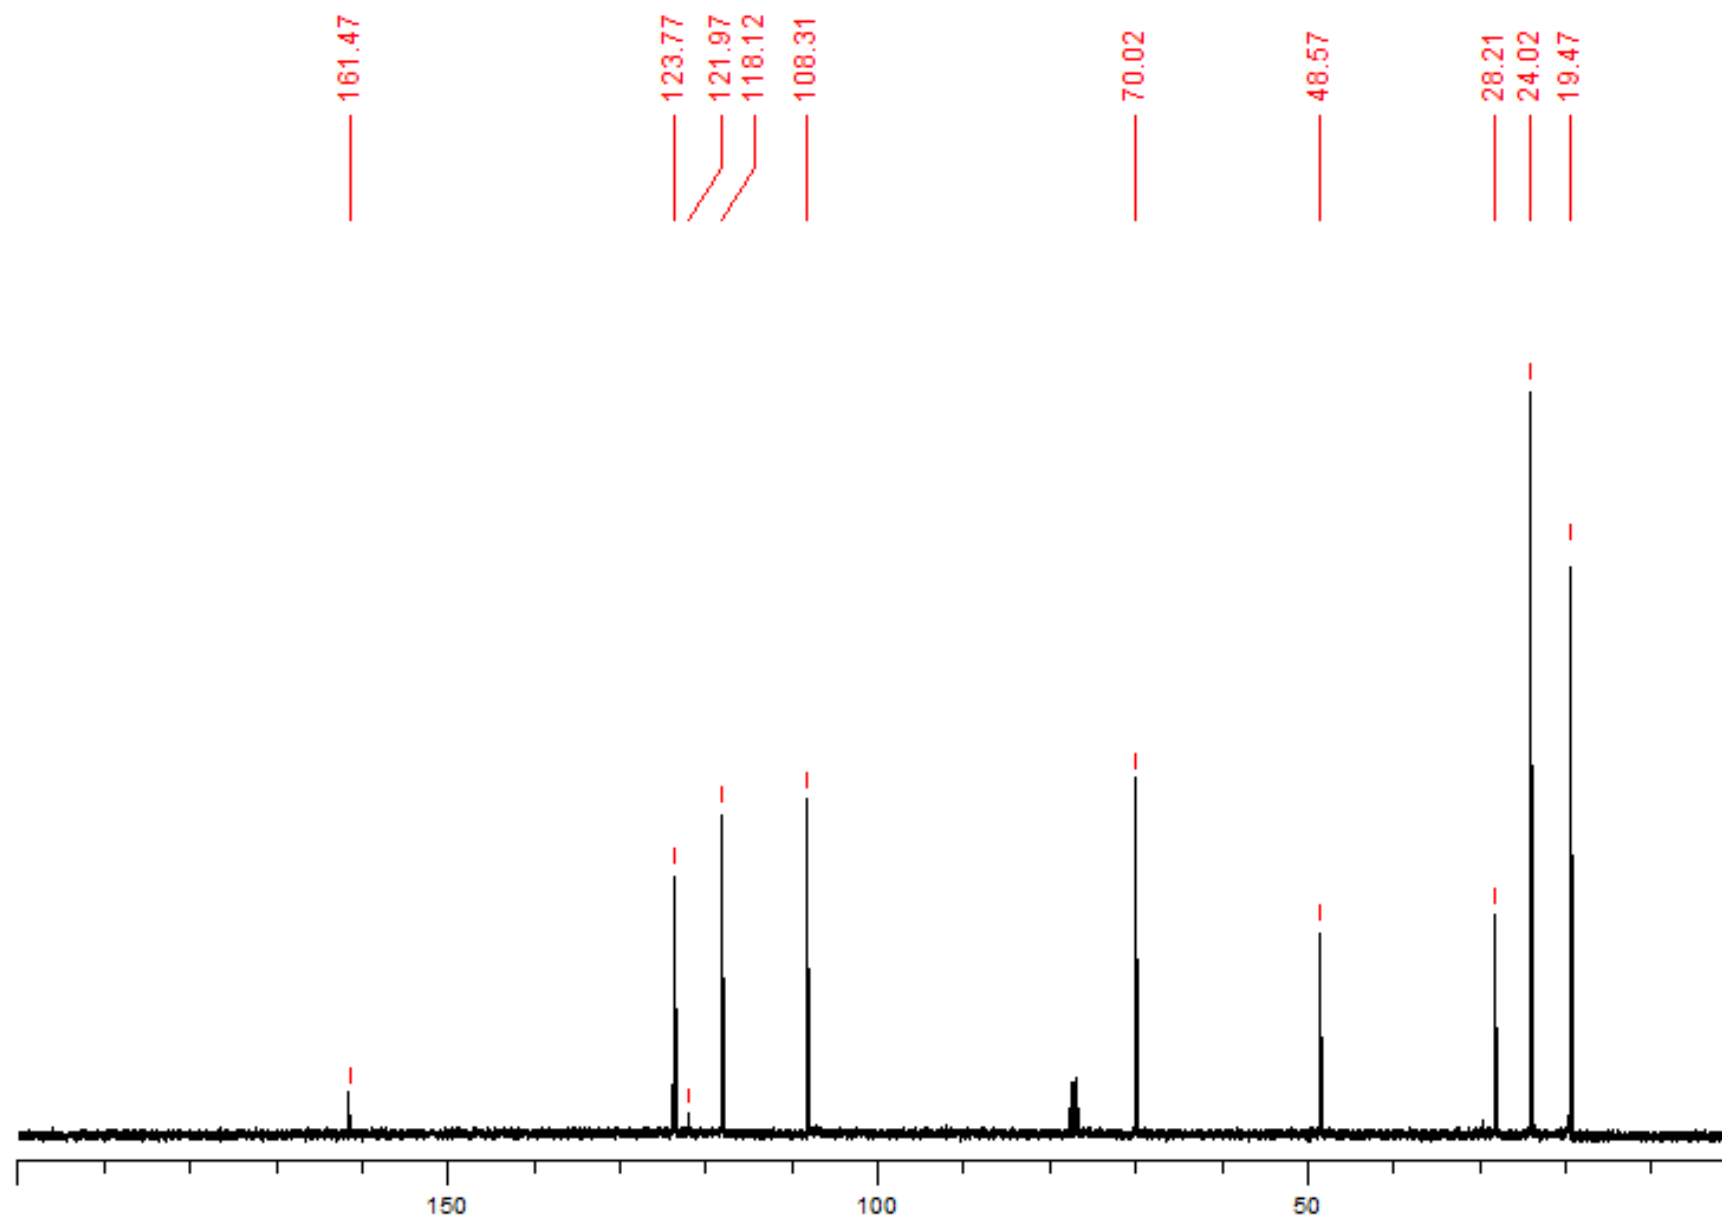

<sup>1</sup>H NMR Compound **6ff**.

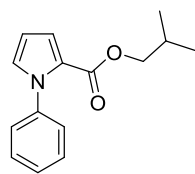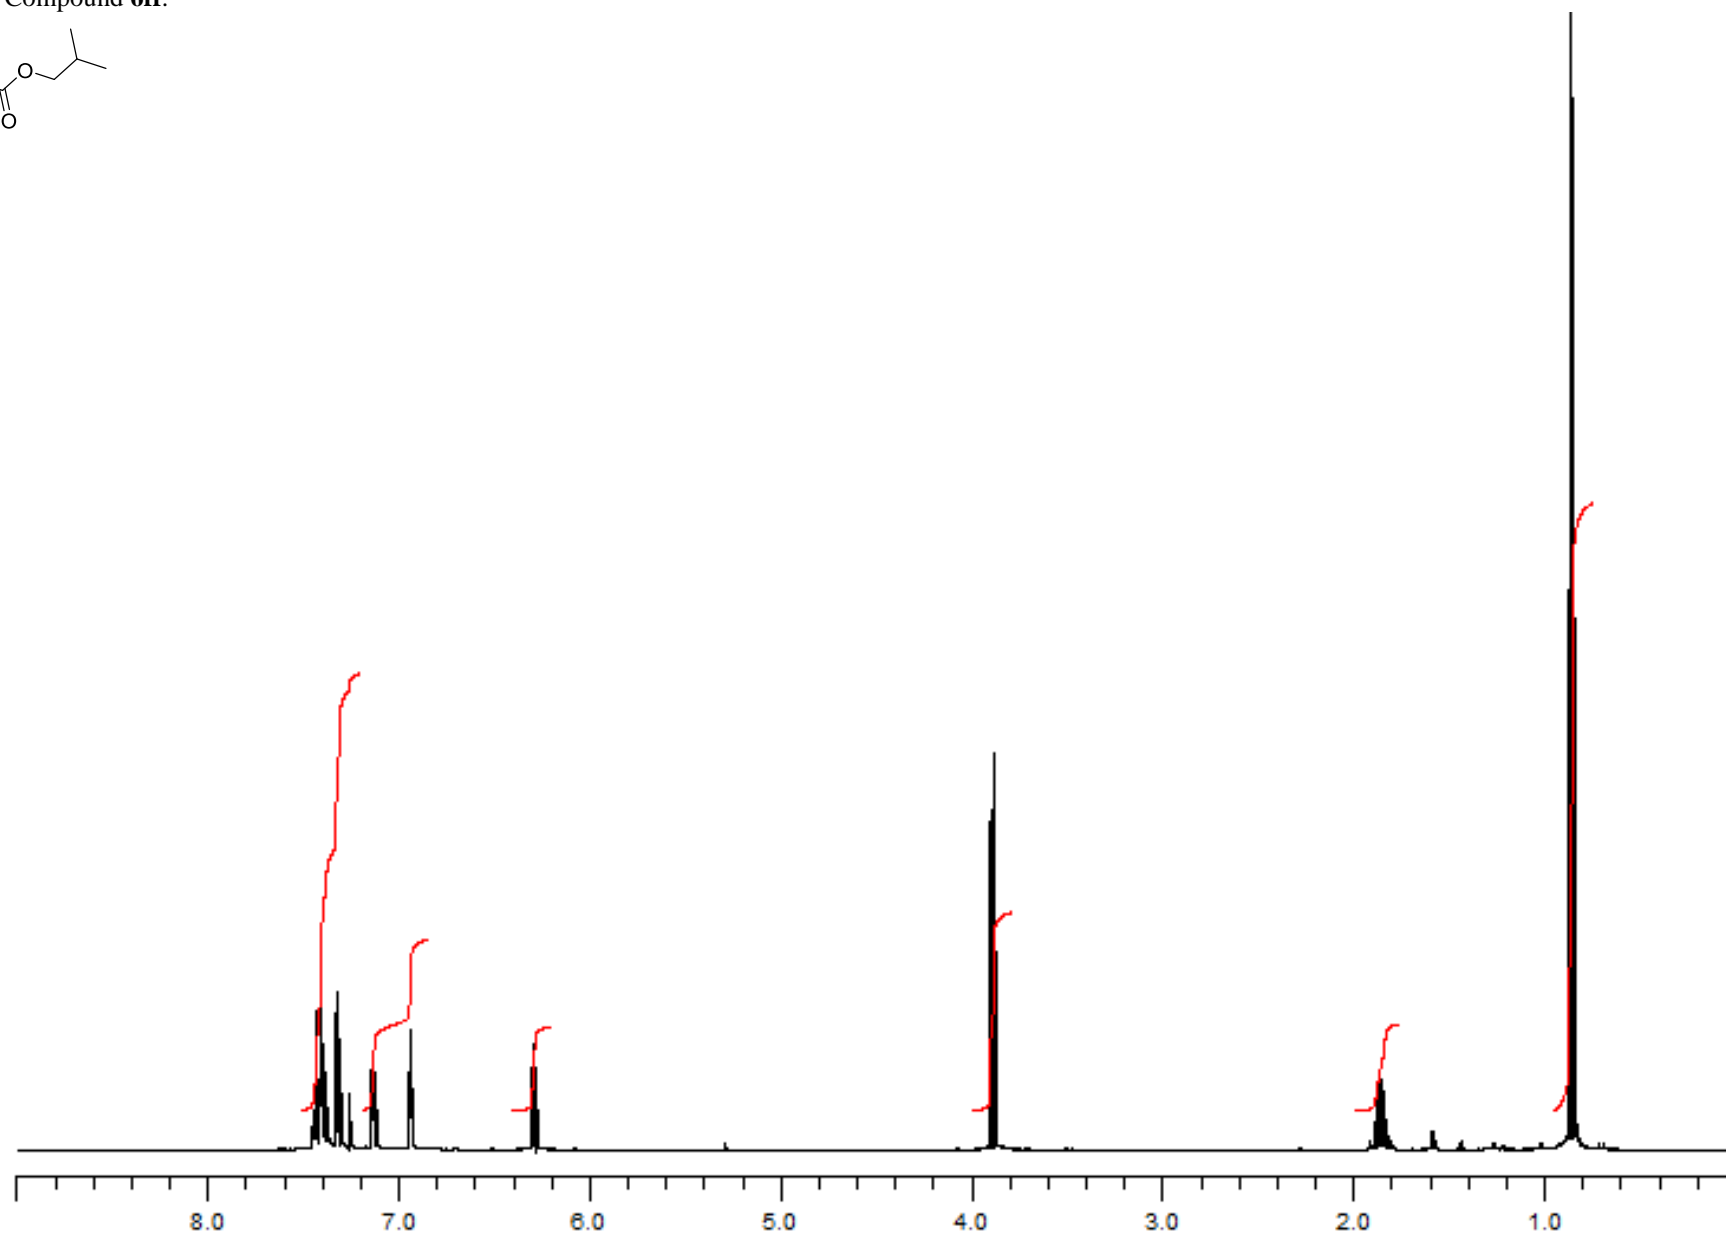

$^{13}\text{C}$  NMR Compound **6ff**.

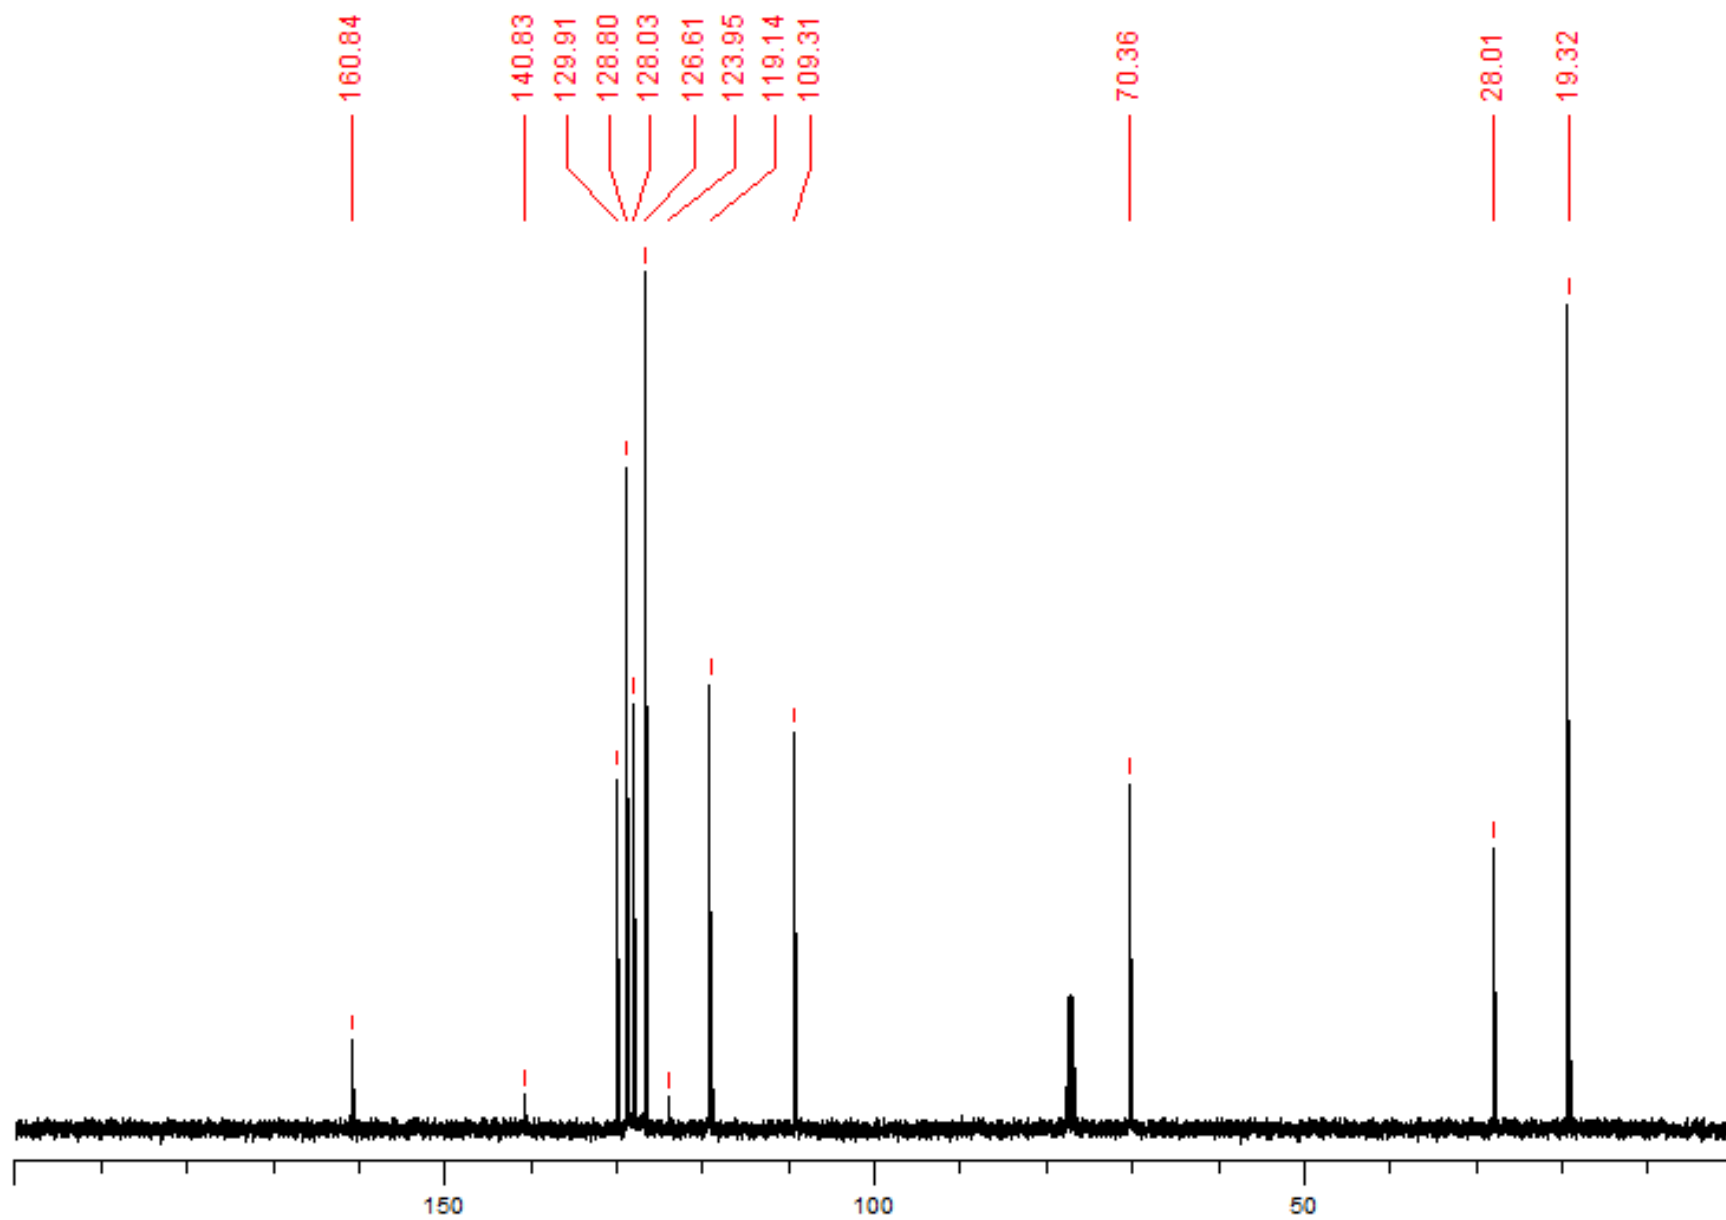

<sup>1</sup>H NMR Compound **6gc**.

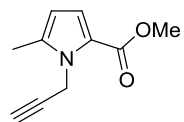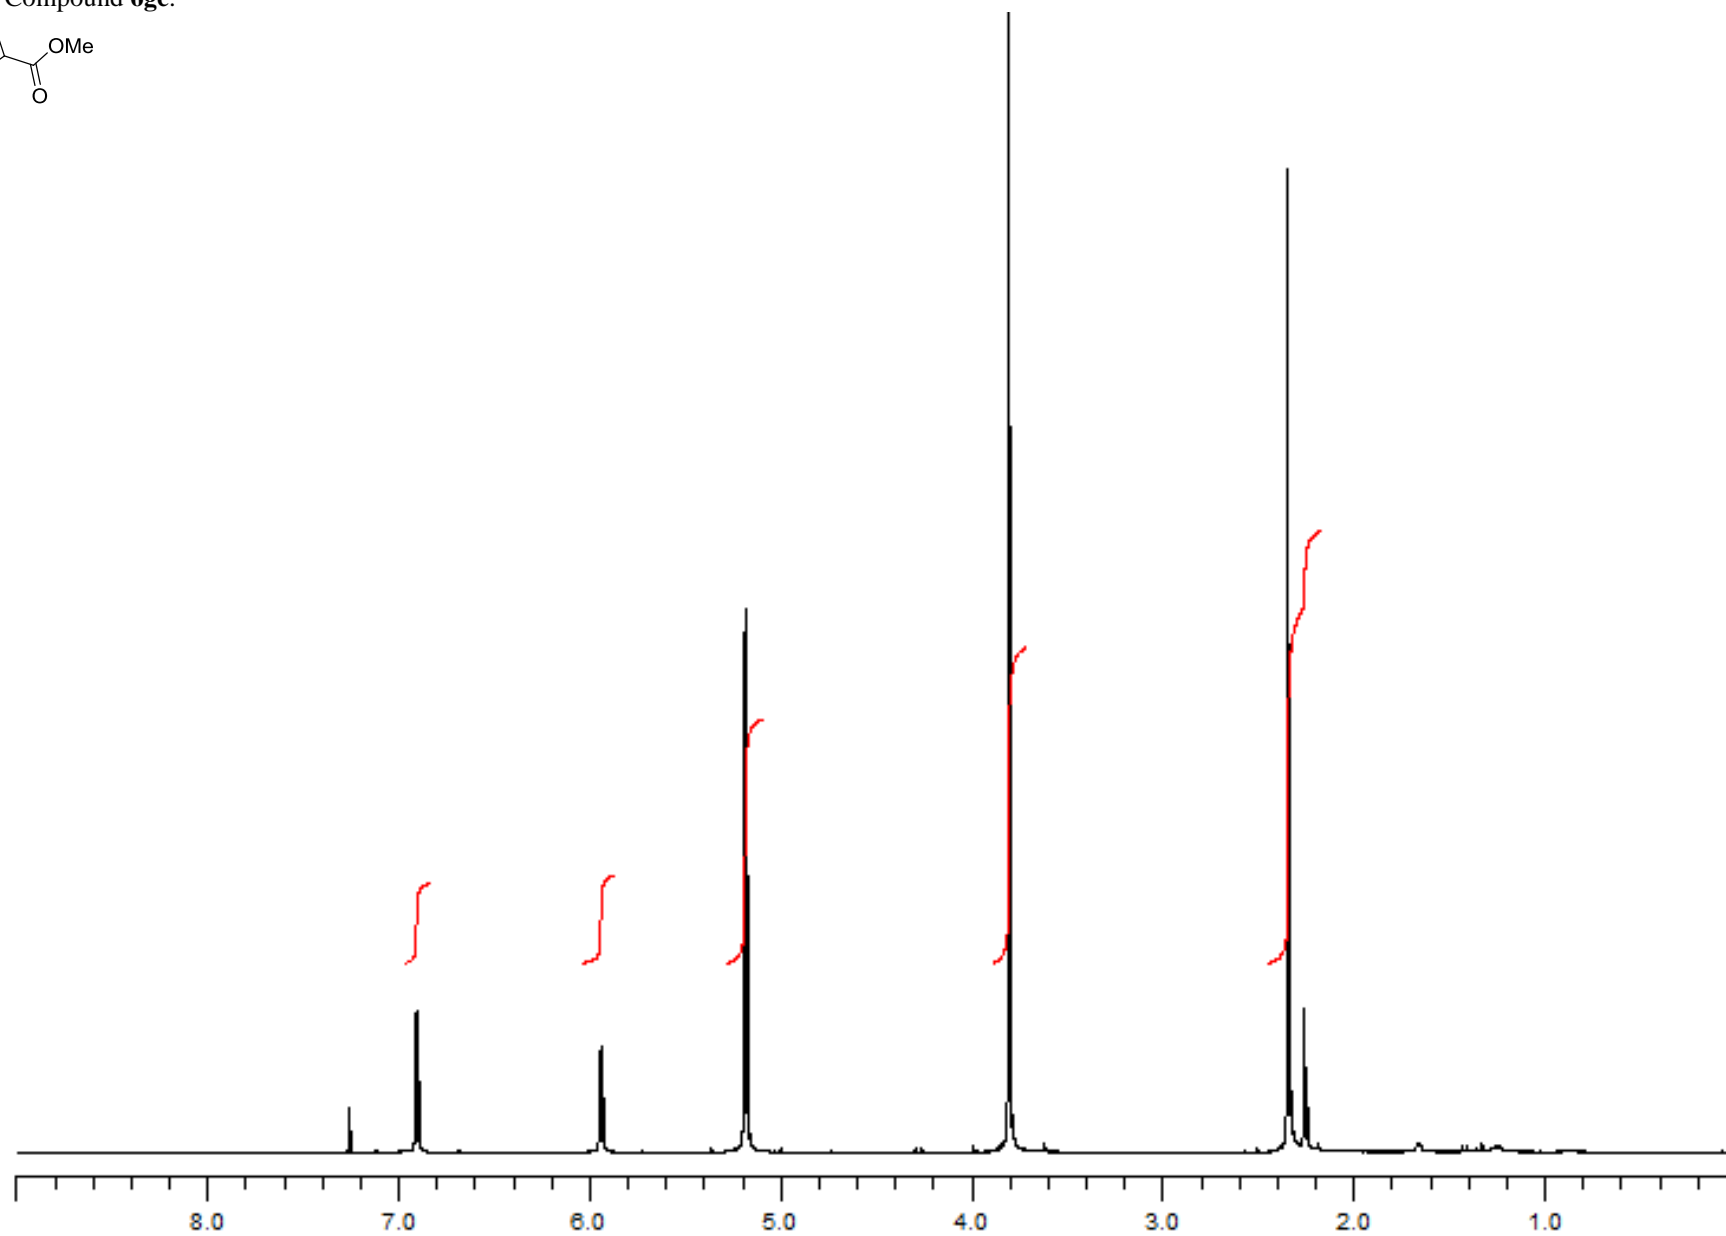

$^{13}\text{C}$  NMR Compound **6gc**.

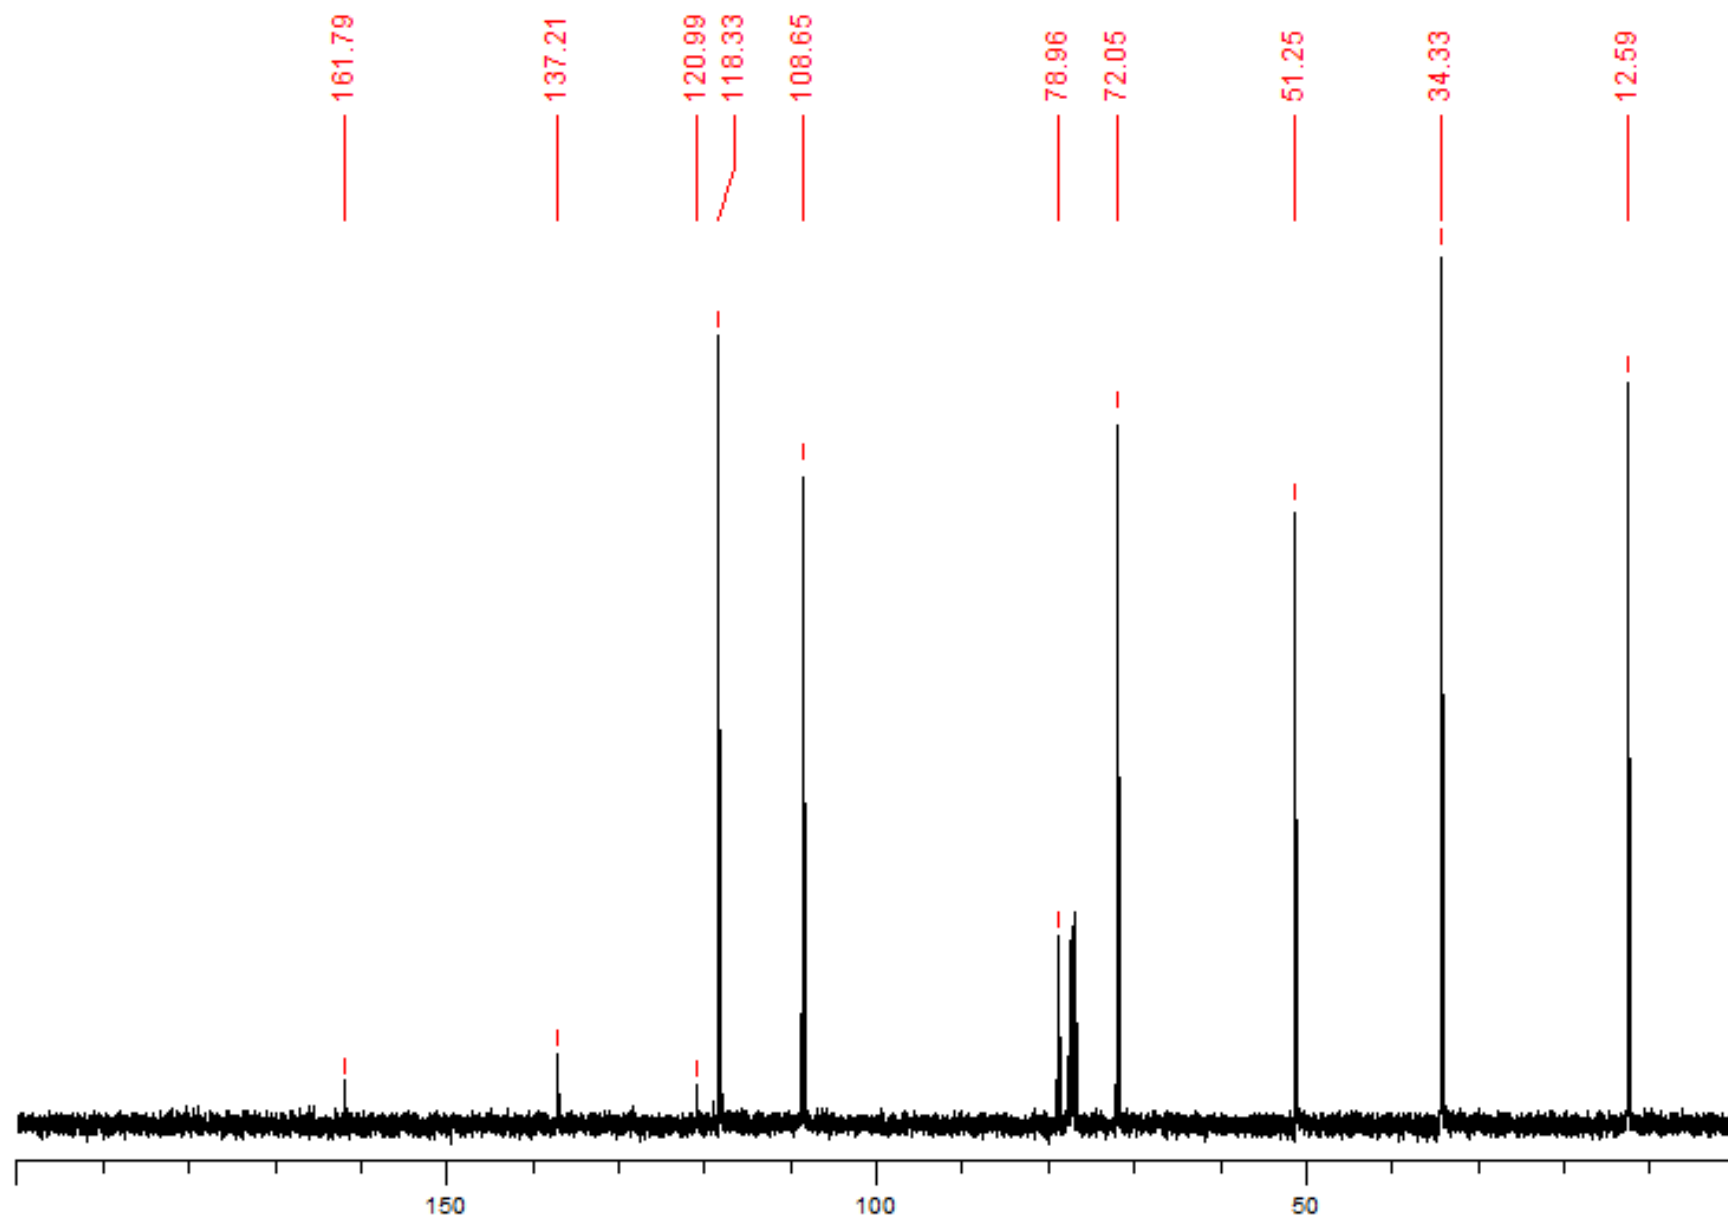

<sup>1</sup>H NMR Compound **6gi**.

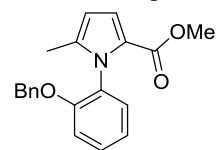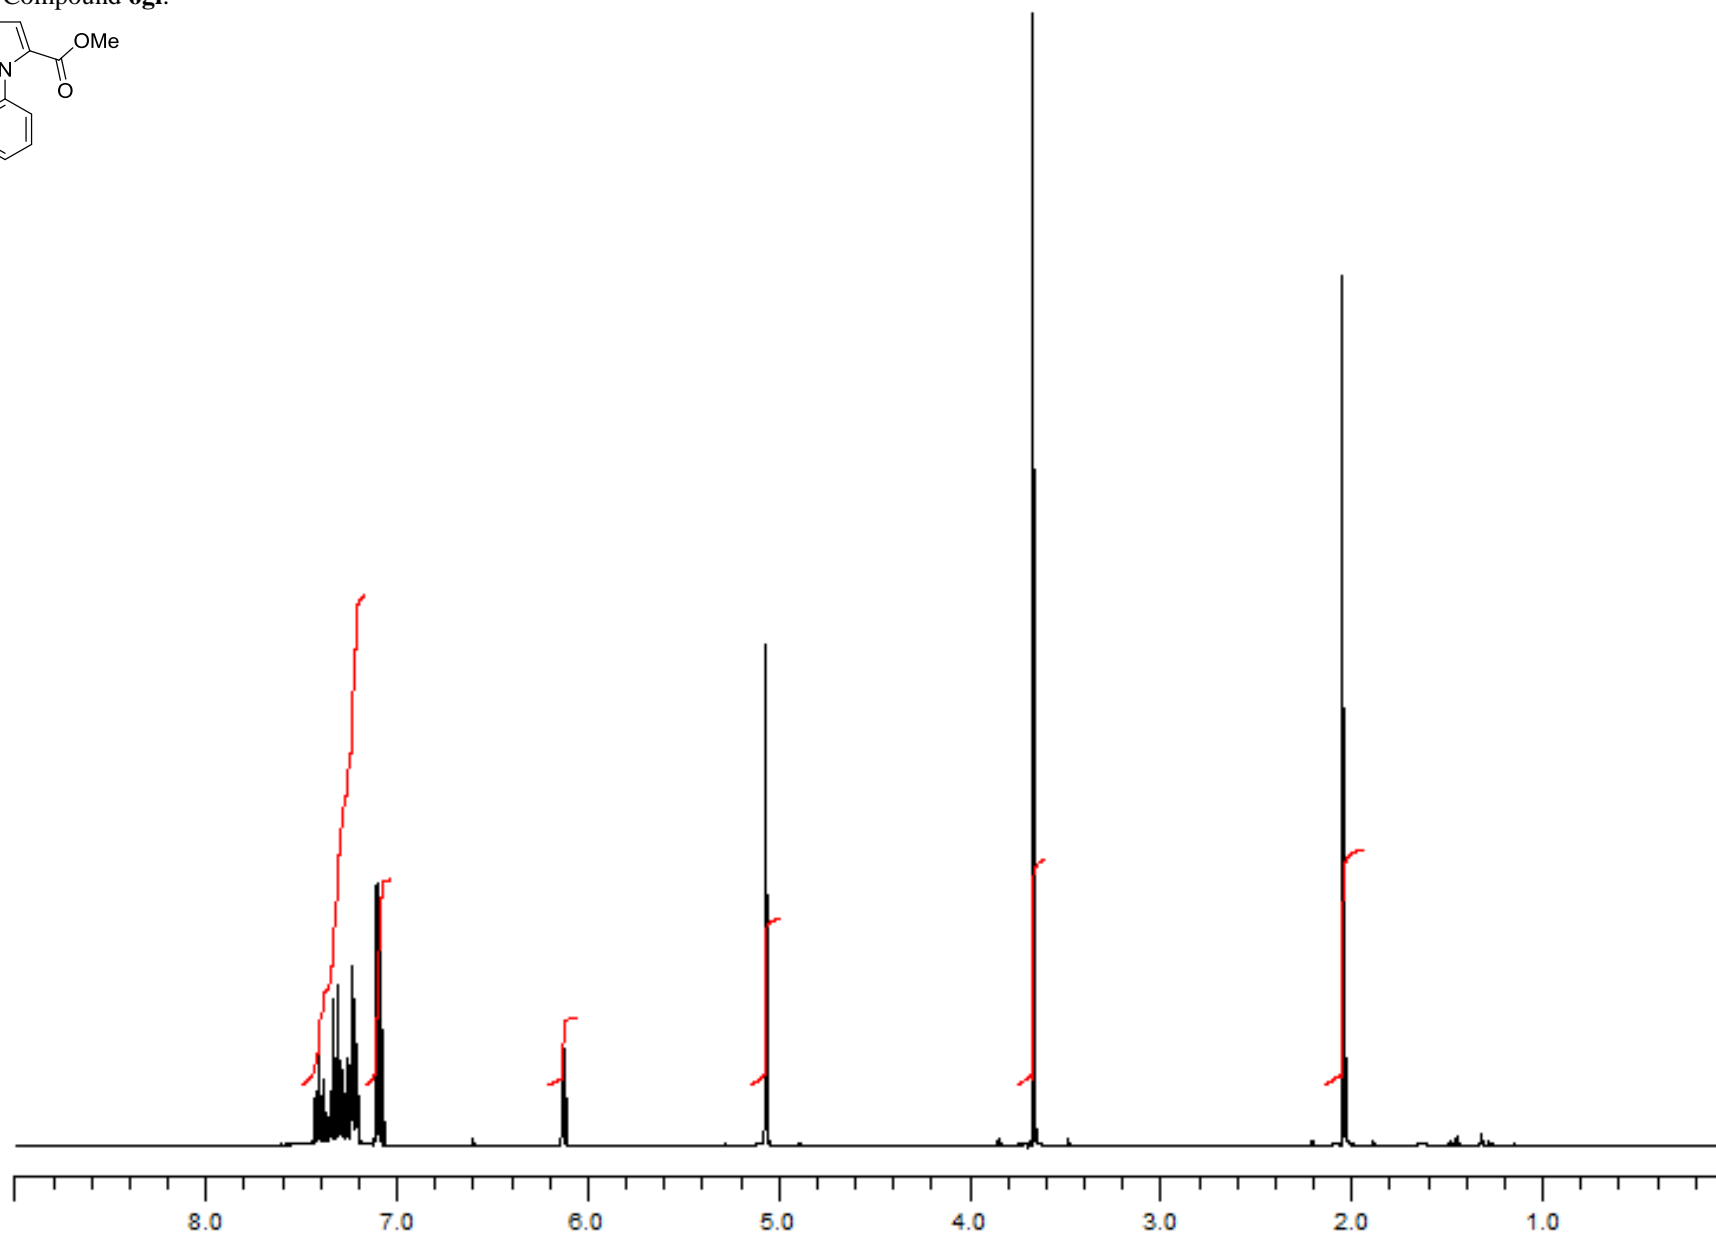

<sup>13</sup>C NMR Compound

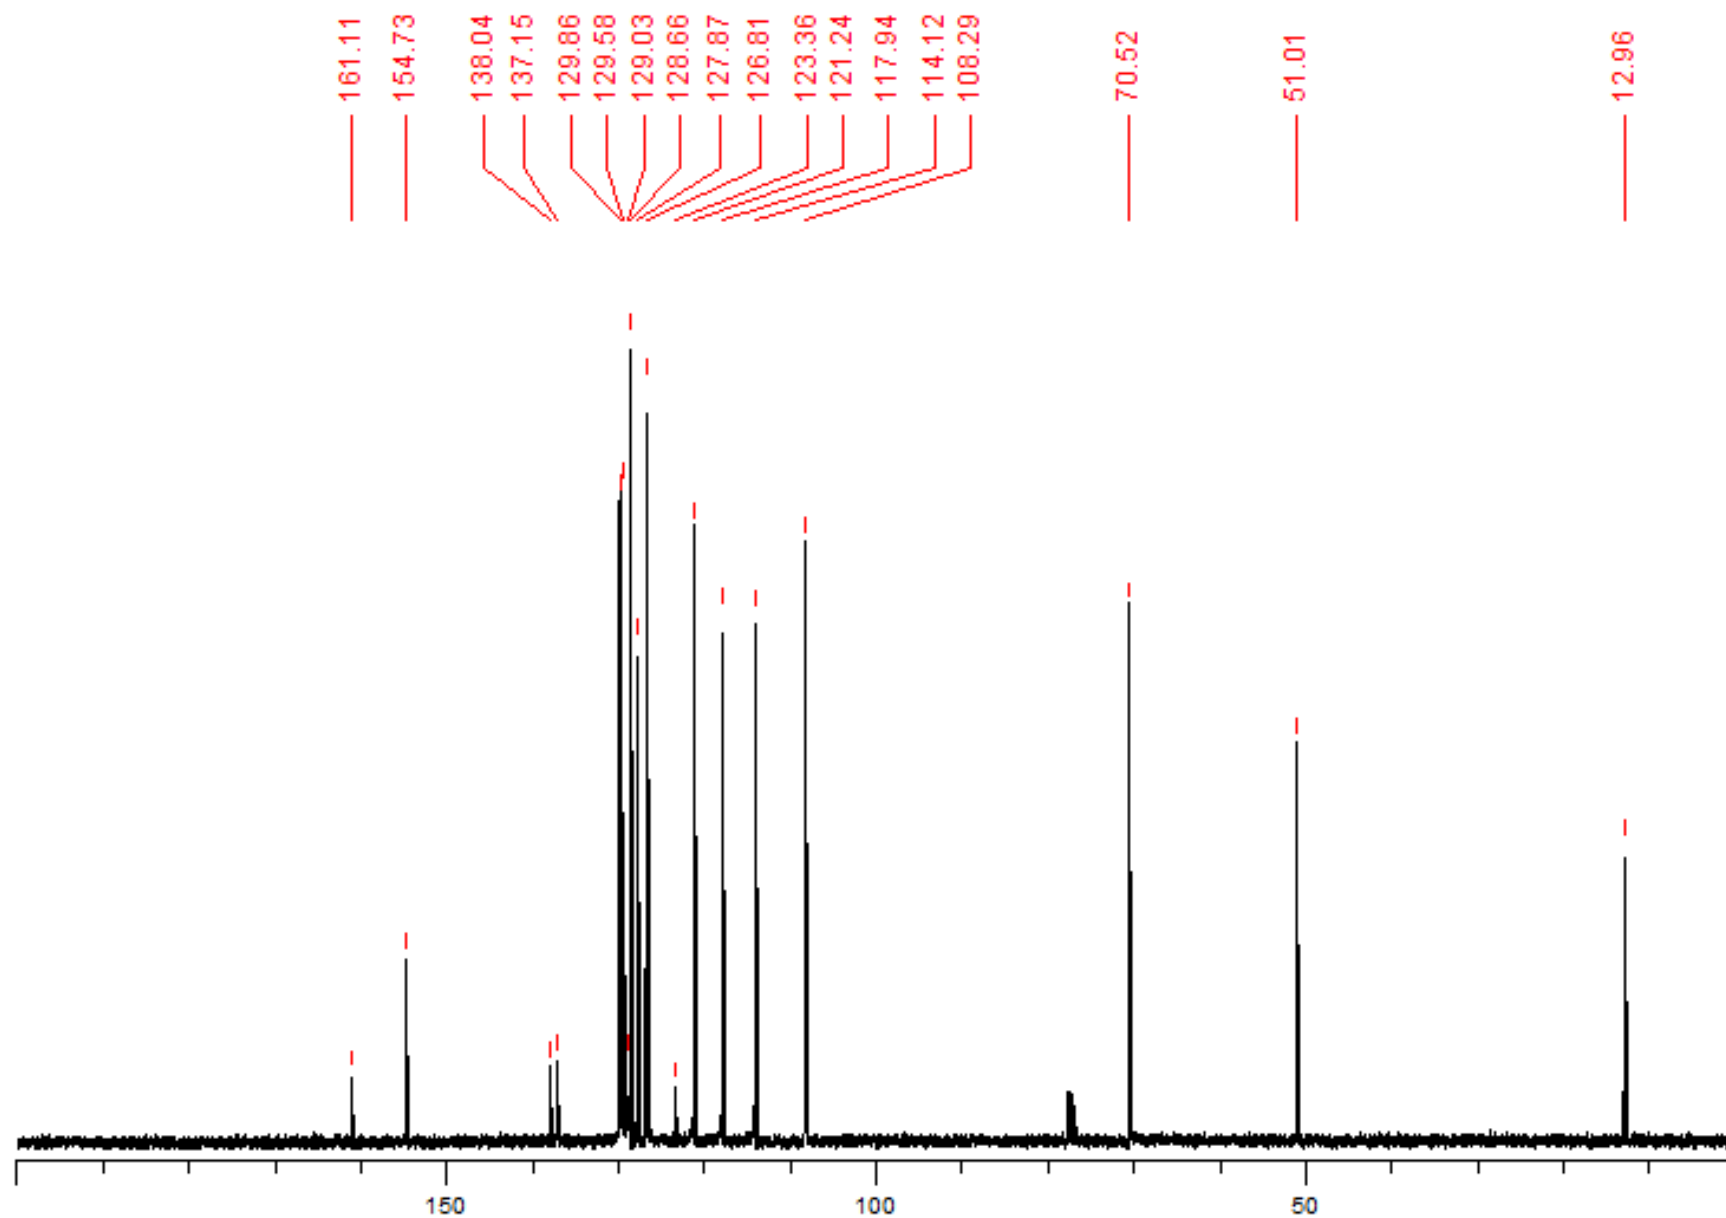



<sup>1</sup>H NMR Compound **6j**.

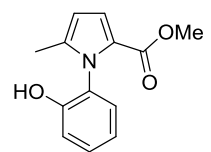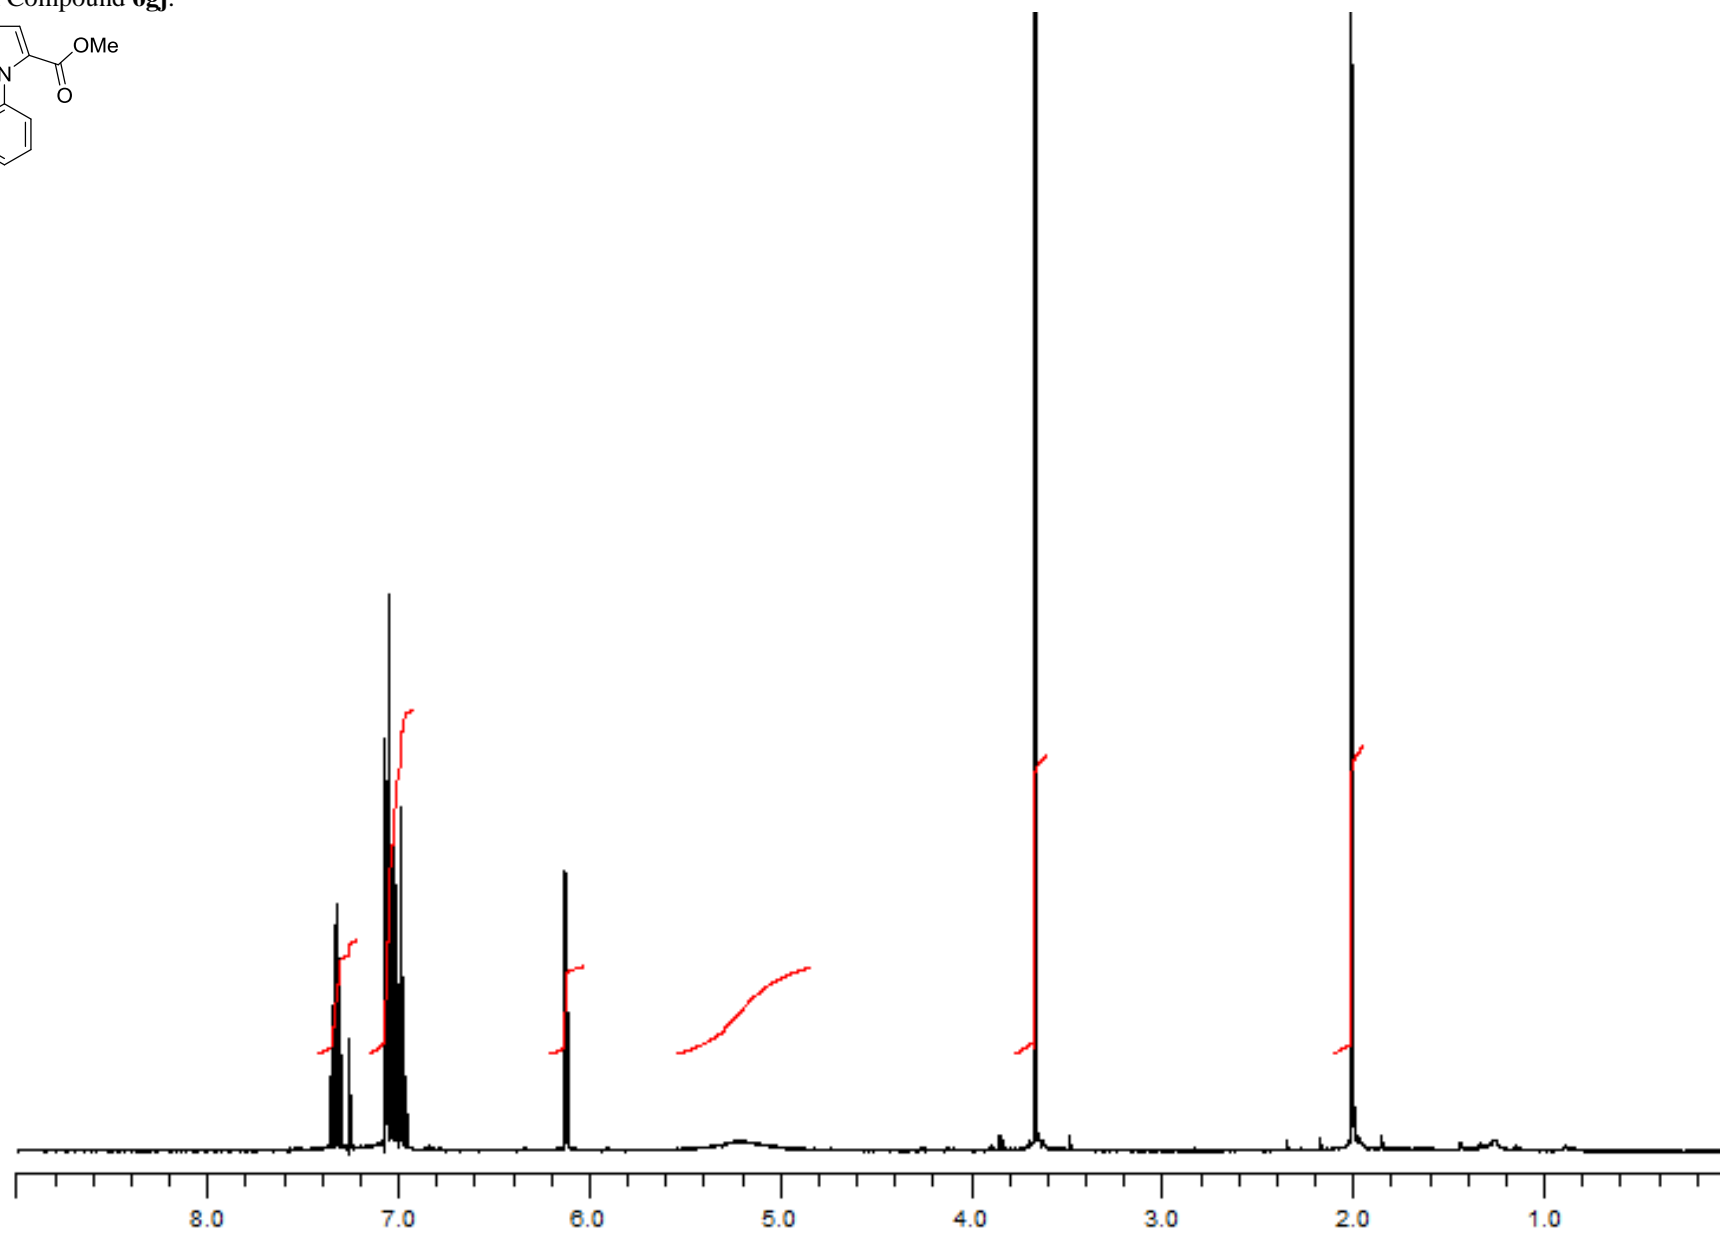

<sup>13</sup>C NMR Compound

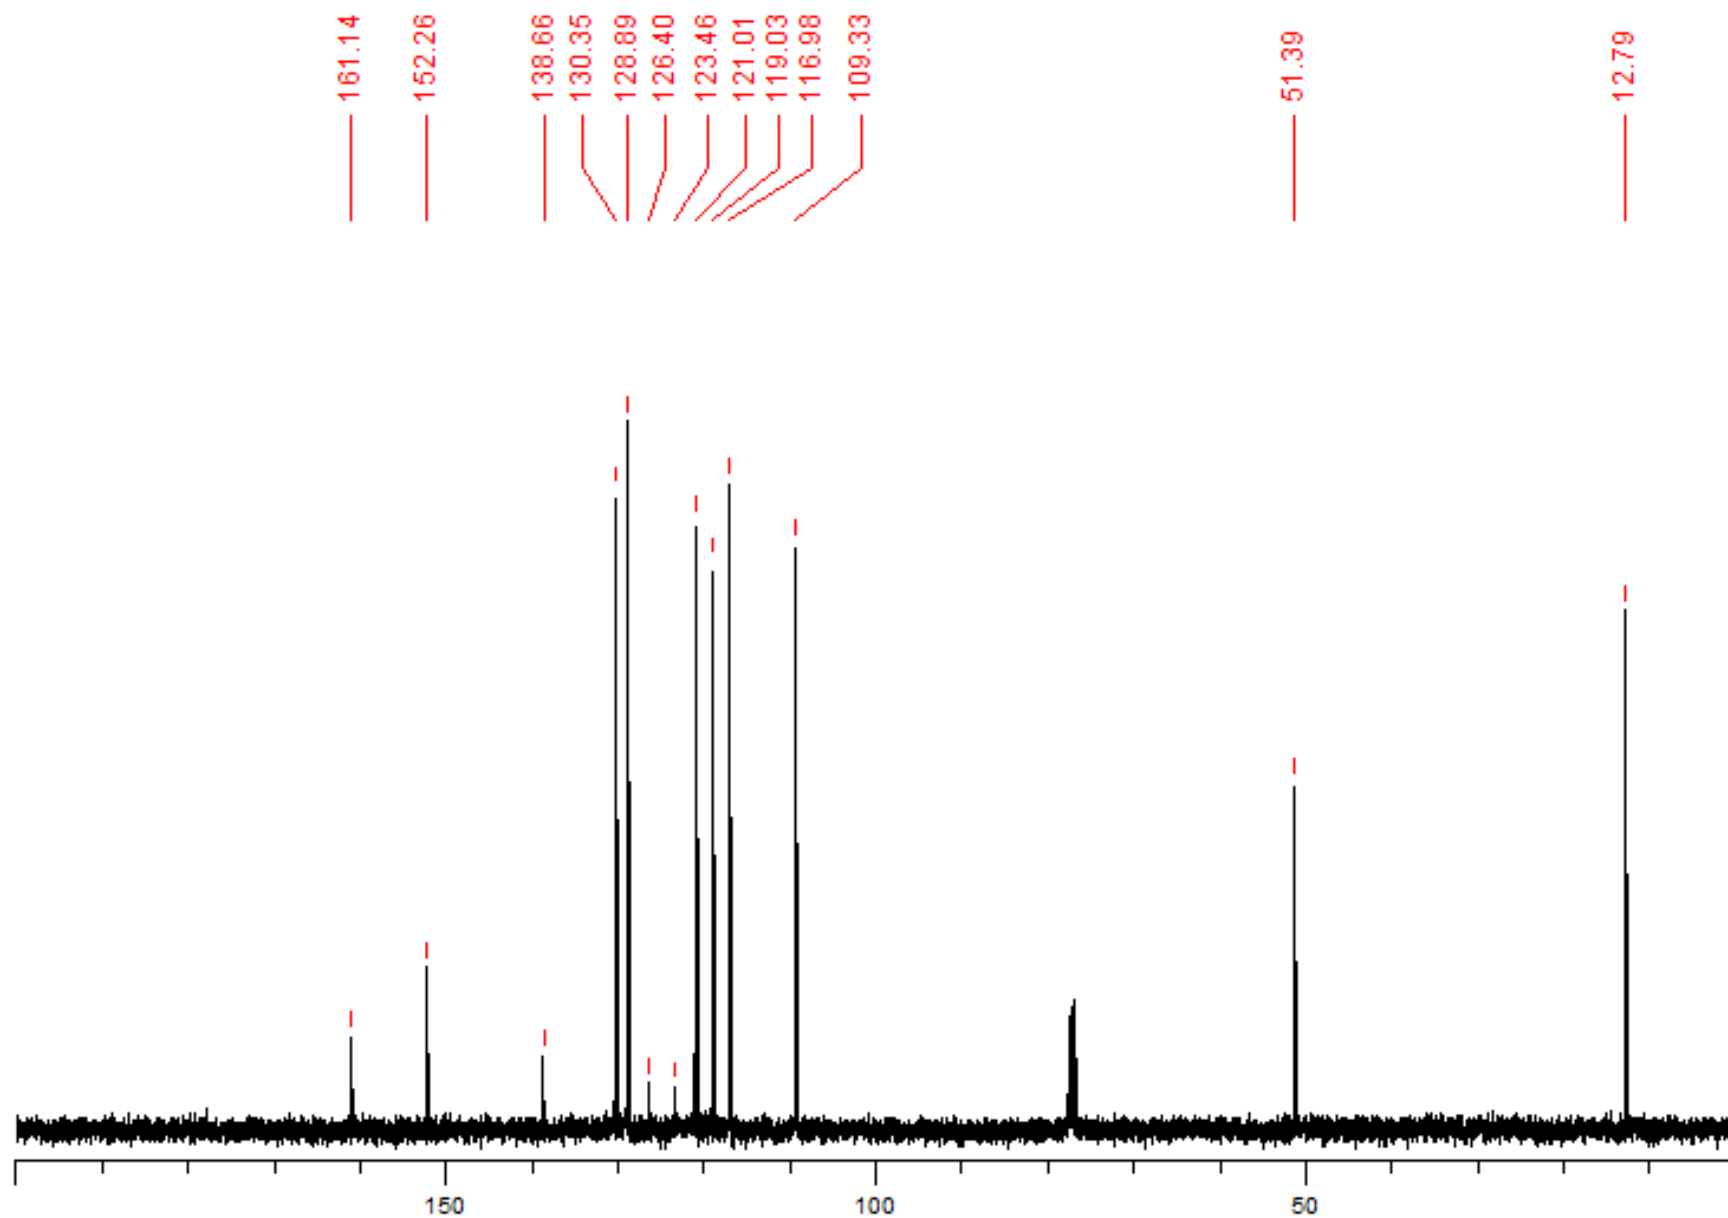

<sup>1</sup>H NMR Compound 7gj.

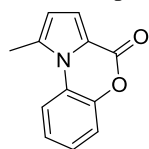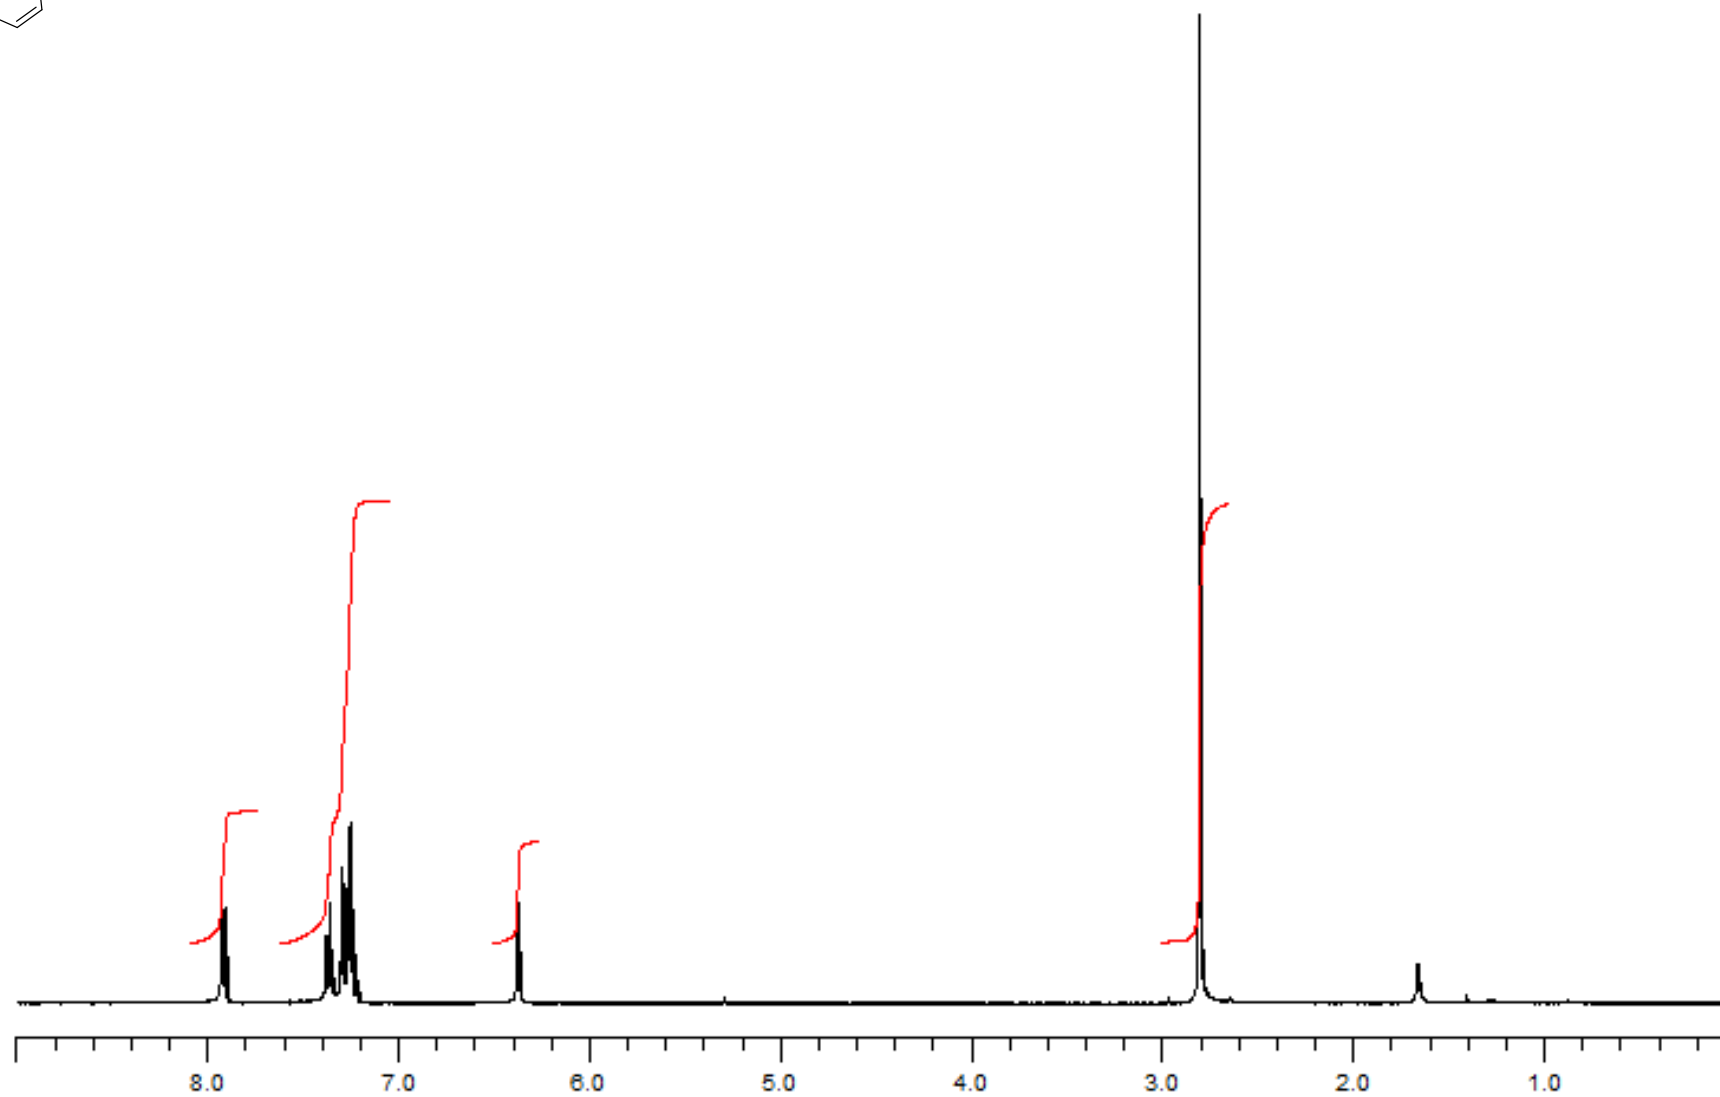

$^{13}\text{C}$  NMR Compound **7gj**.

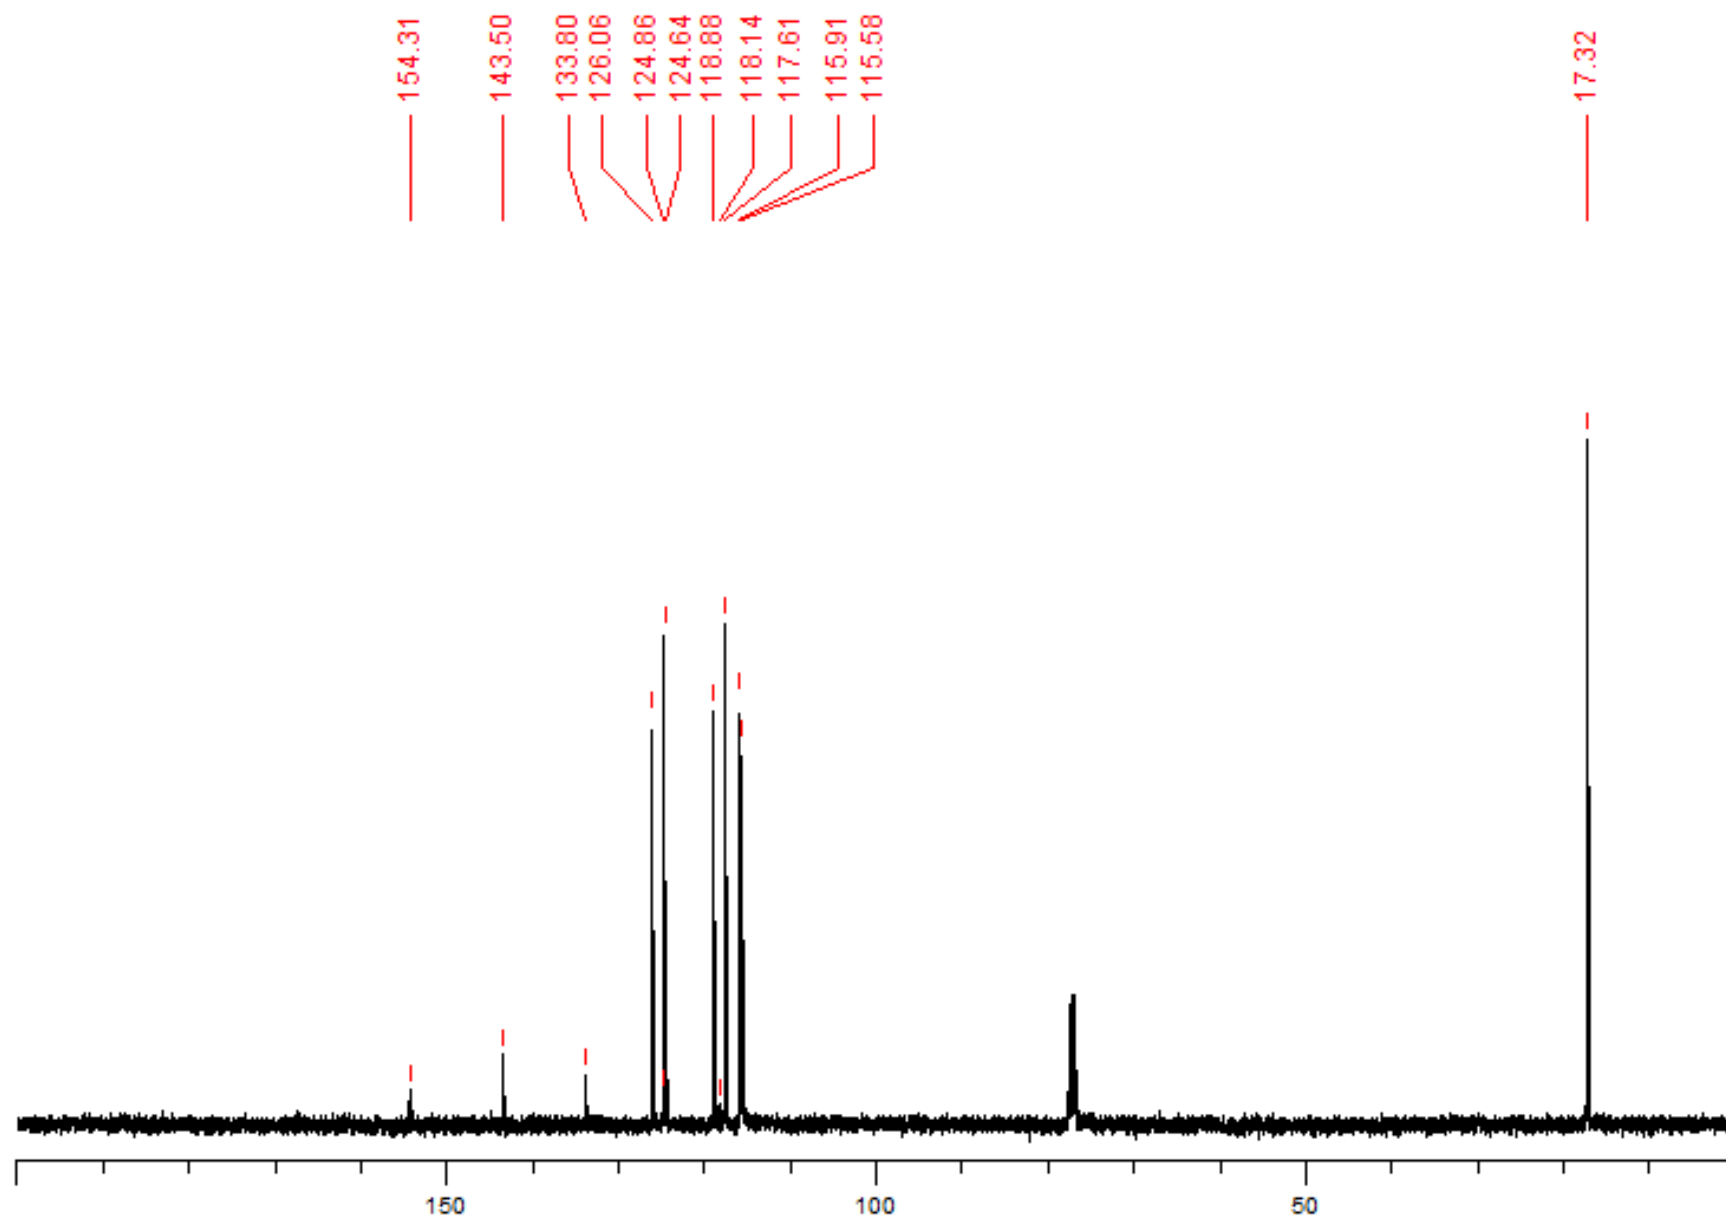

<sup>1</sup>H NMR Compound 7gk.

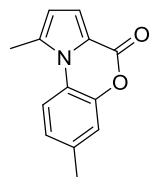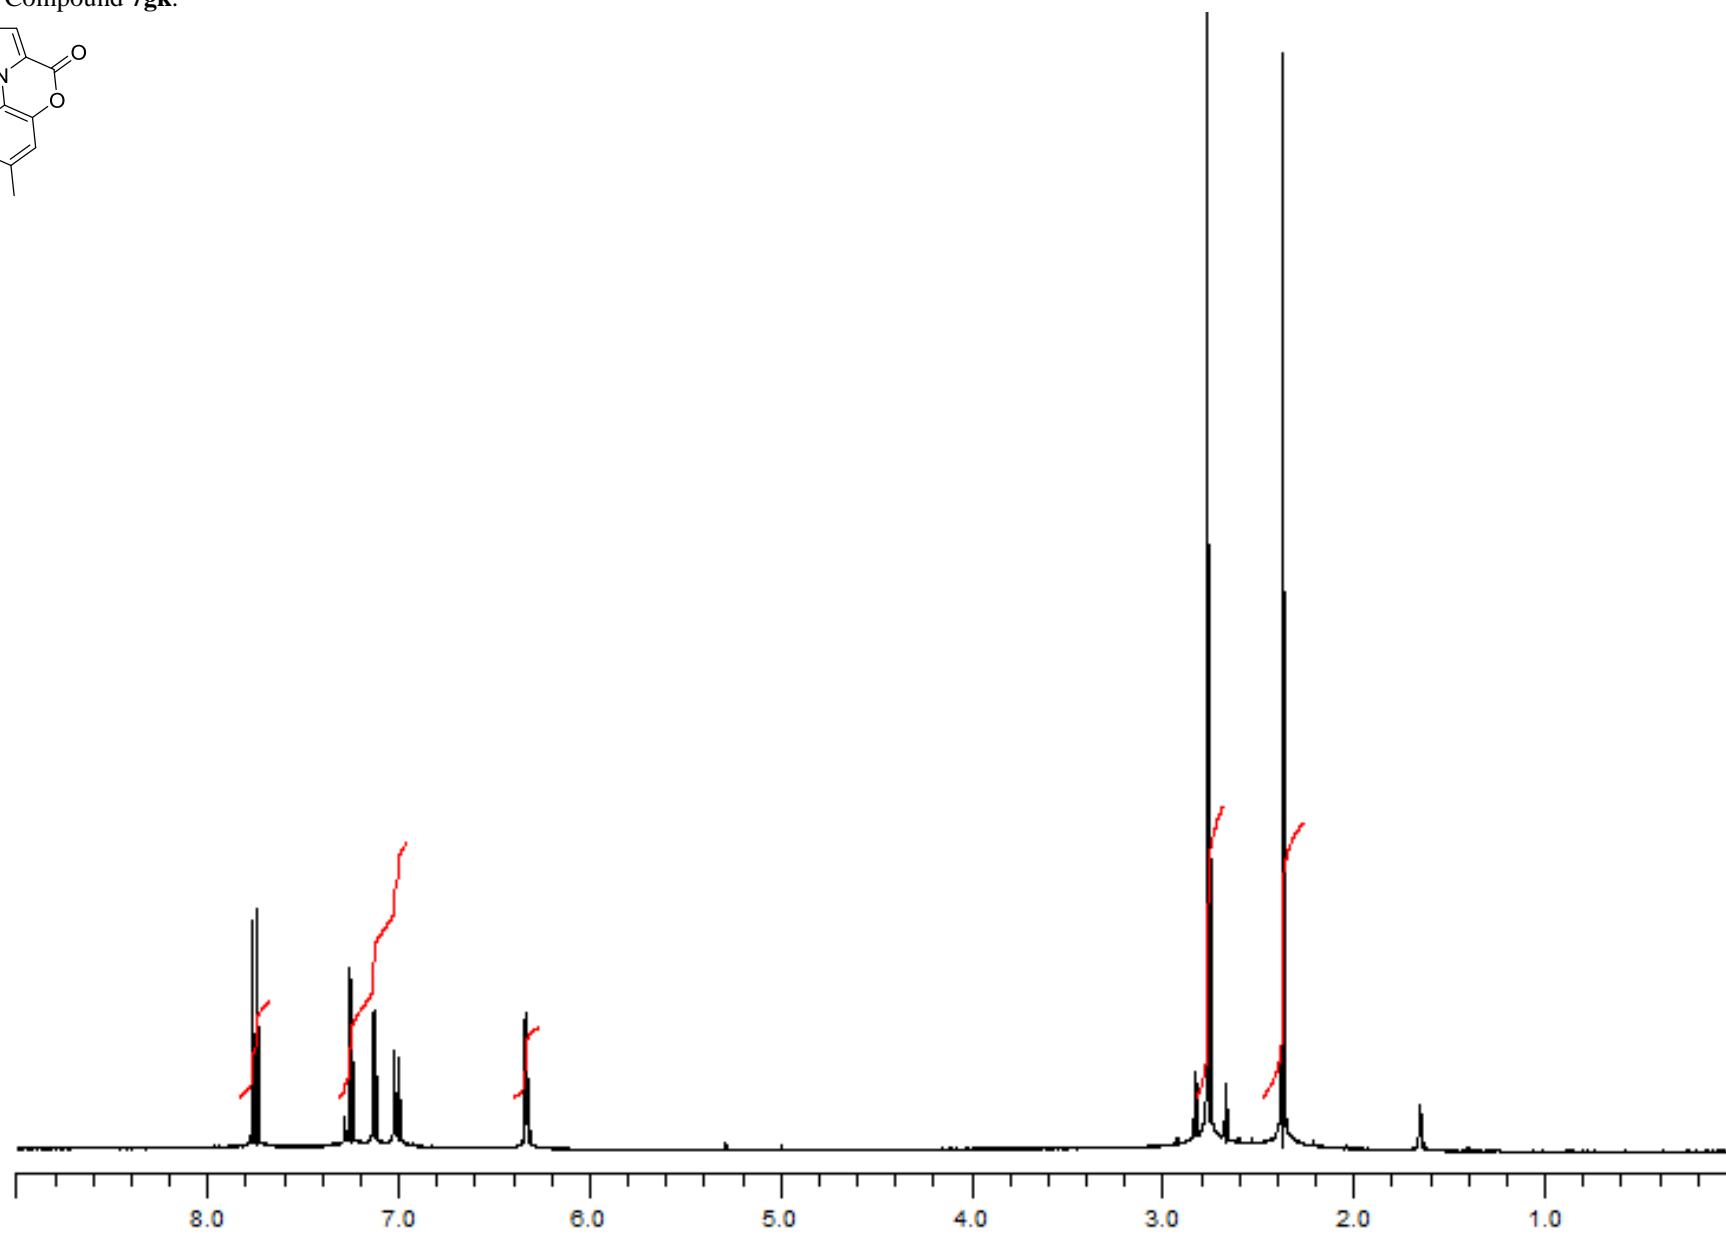

$^{13}\text{C}$  NMR Compound **7gk**.

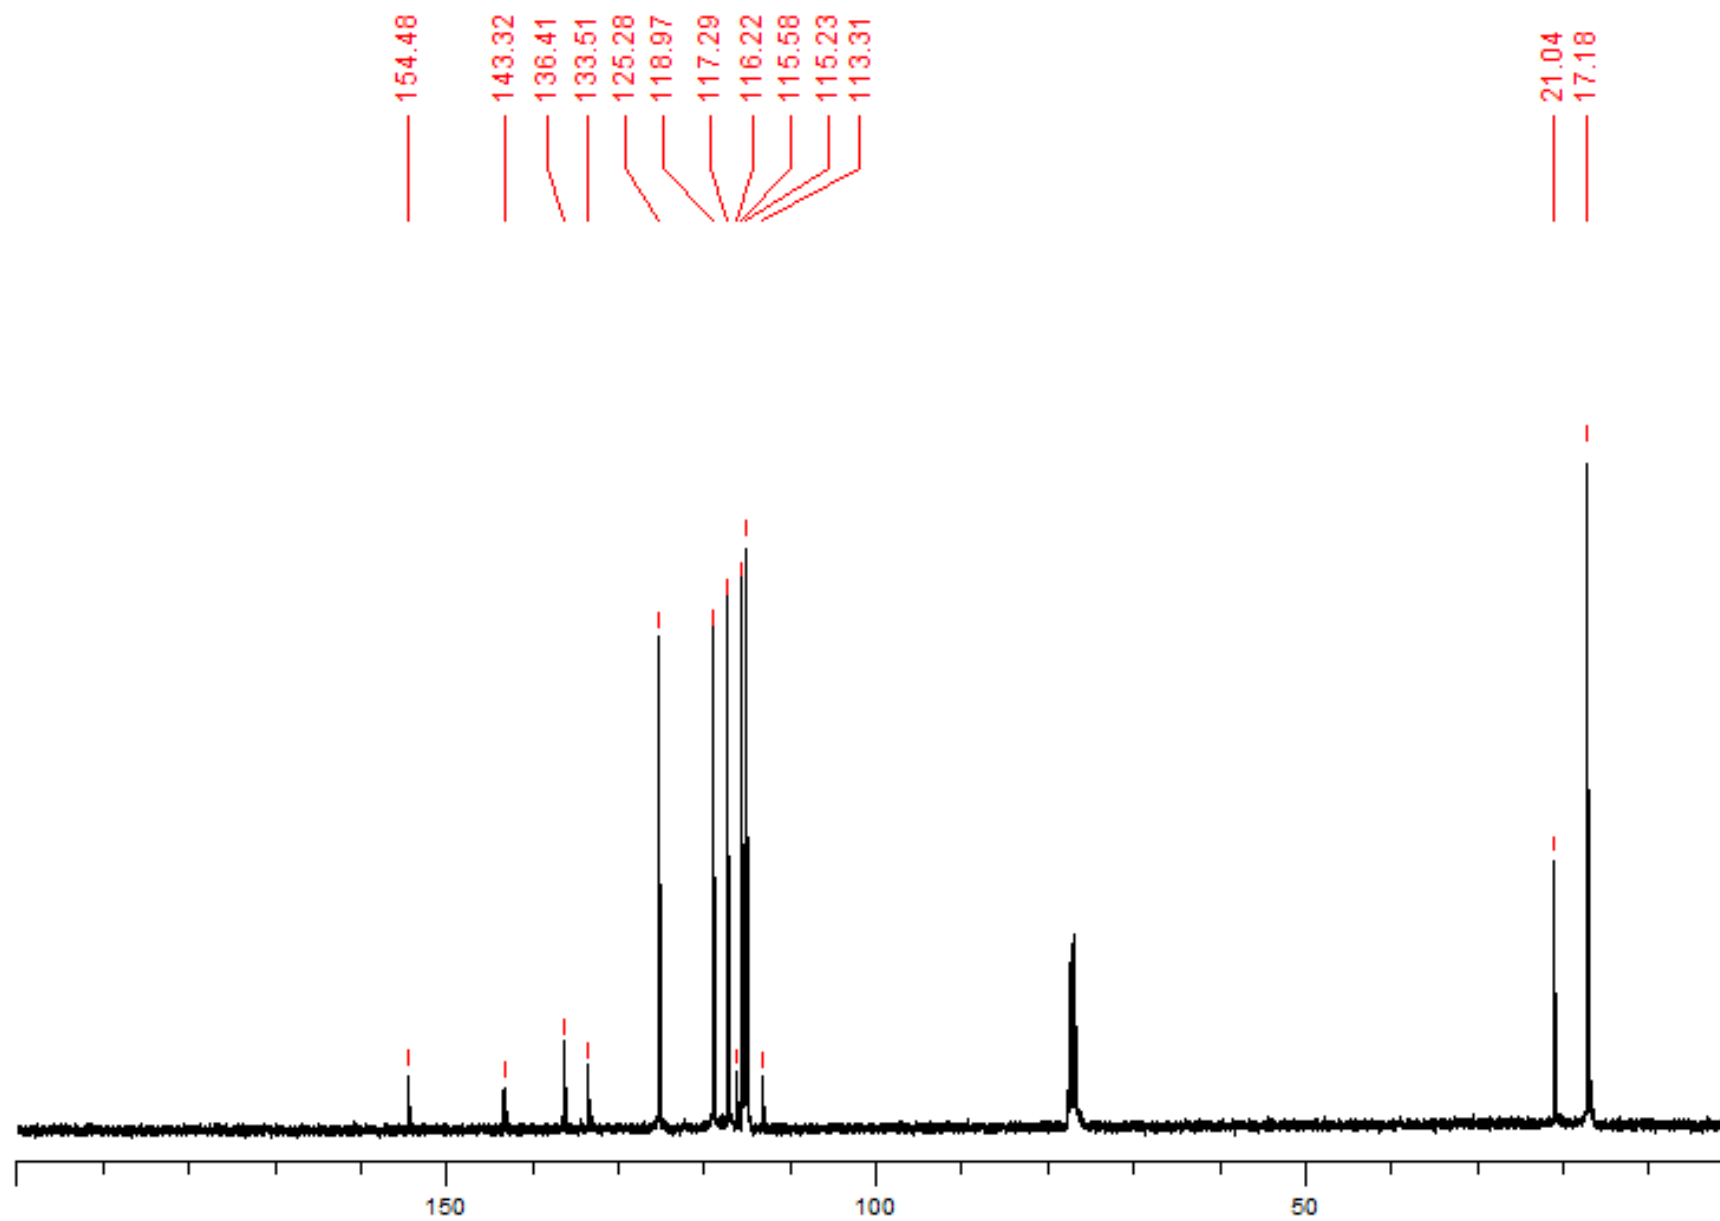

<sup>1</sup>H NMR Compound 7f.

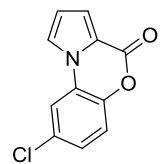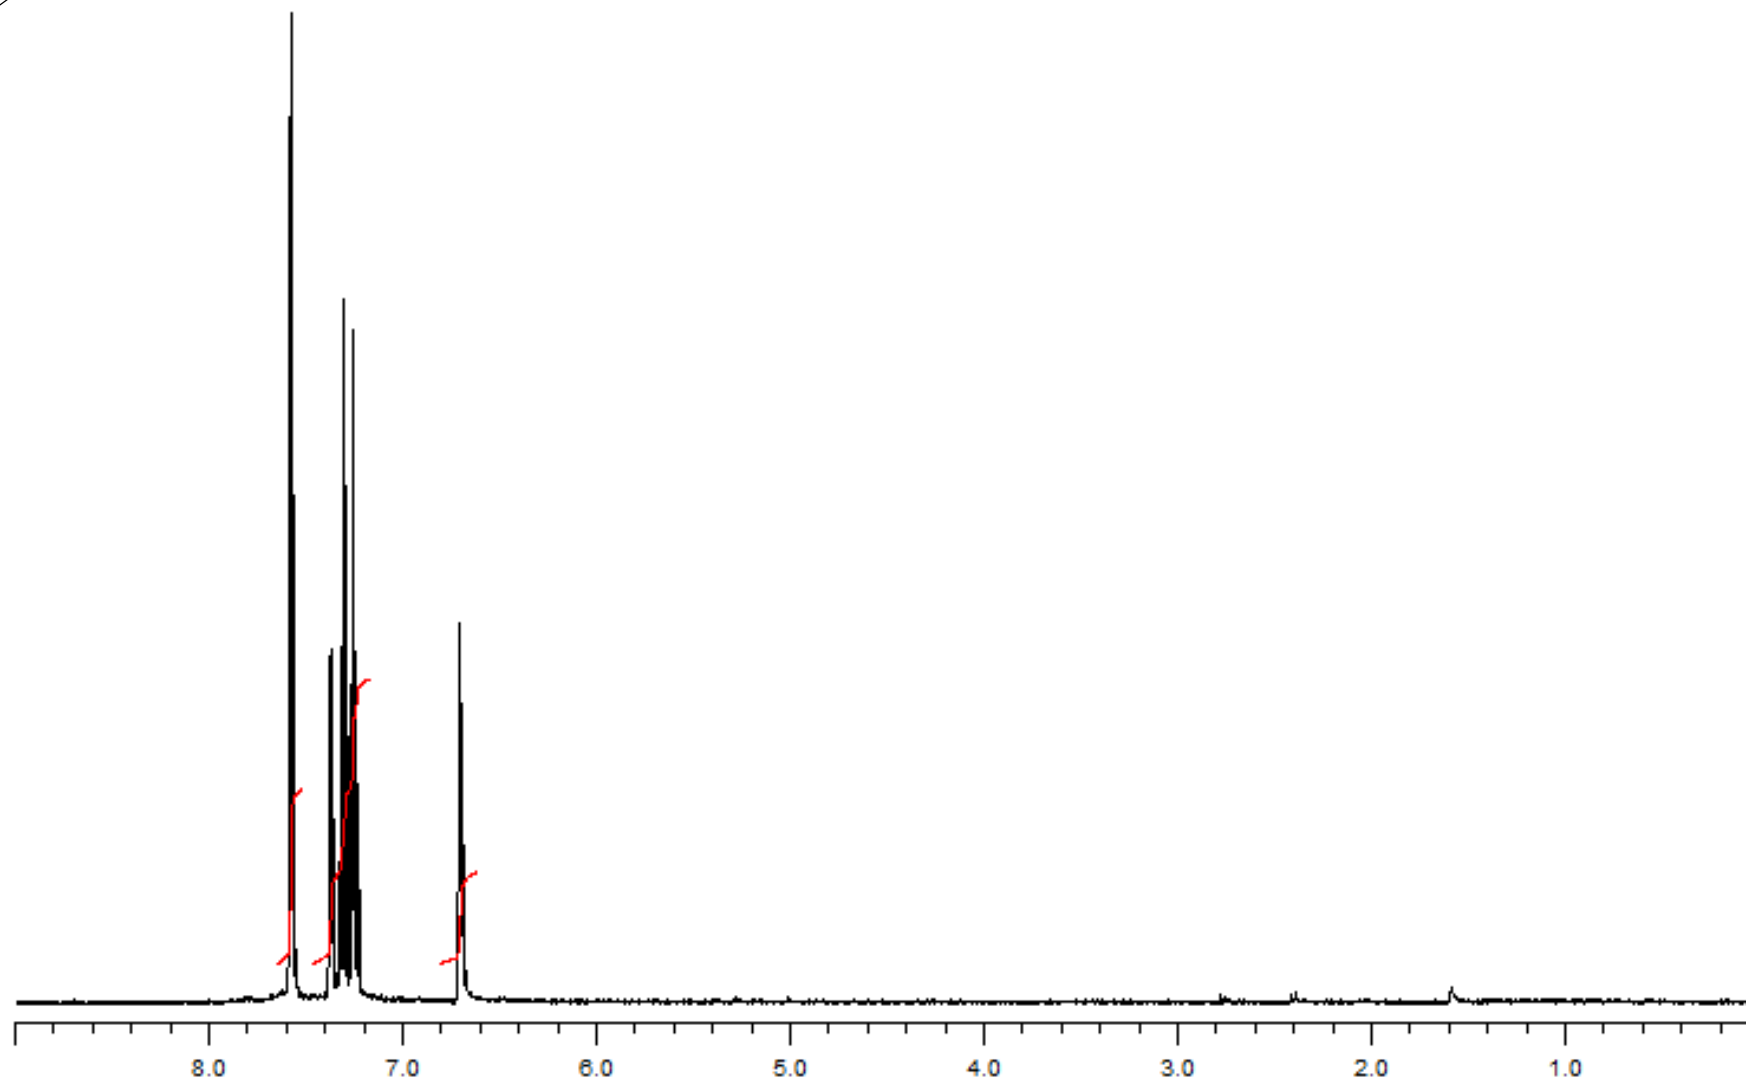

$^{13}\text{C}$  NMR Compound **7f**.

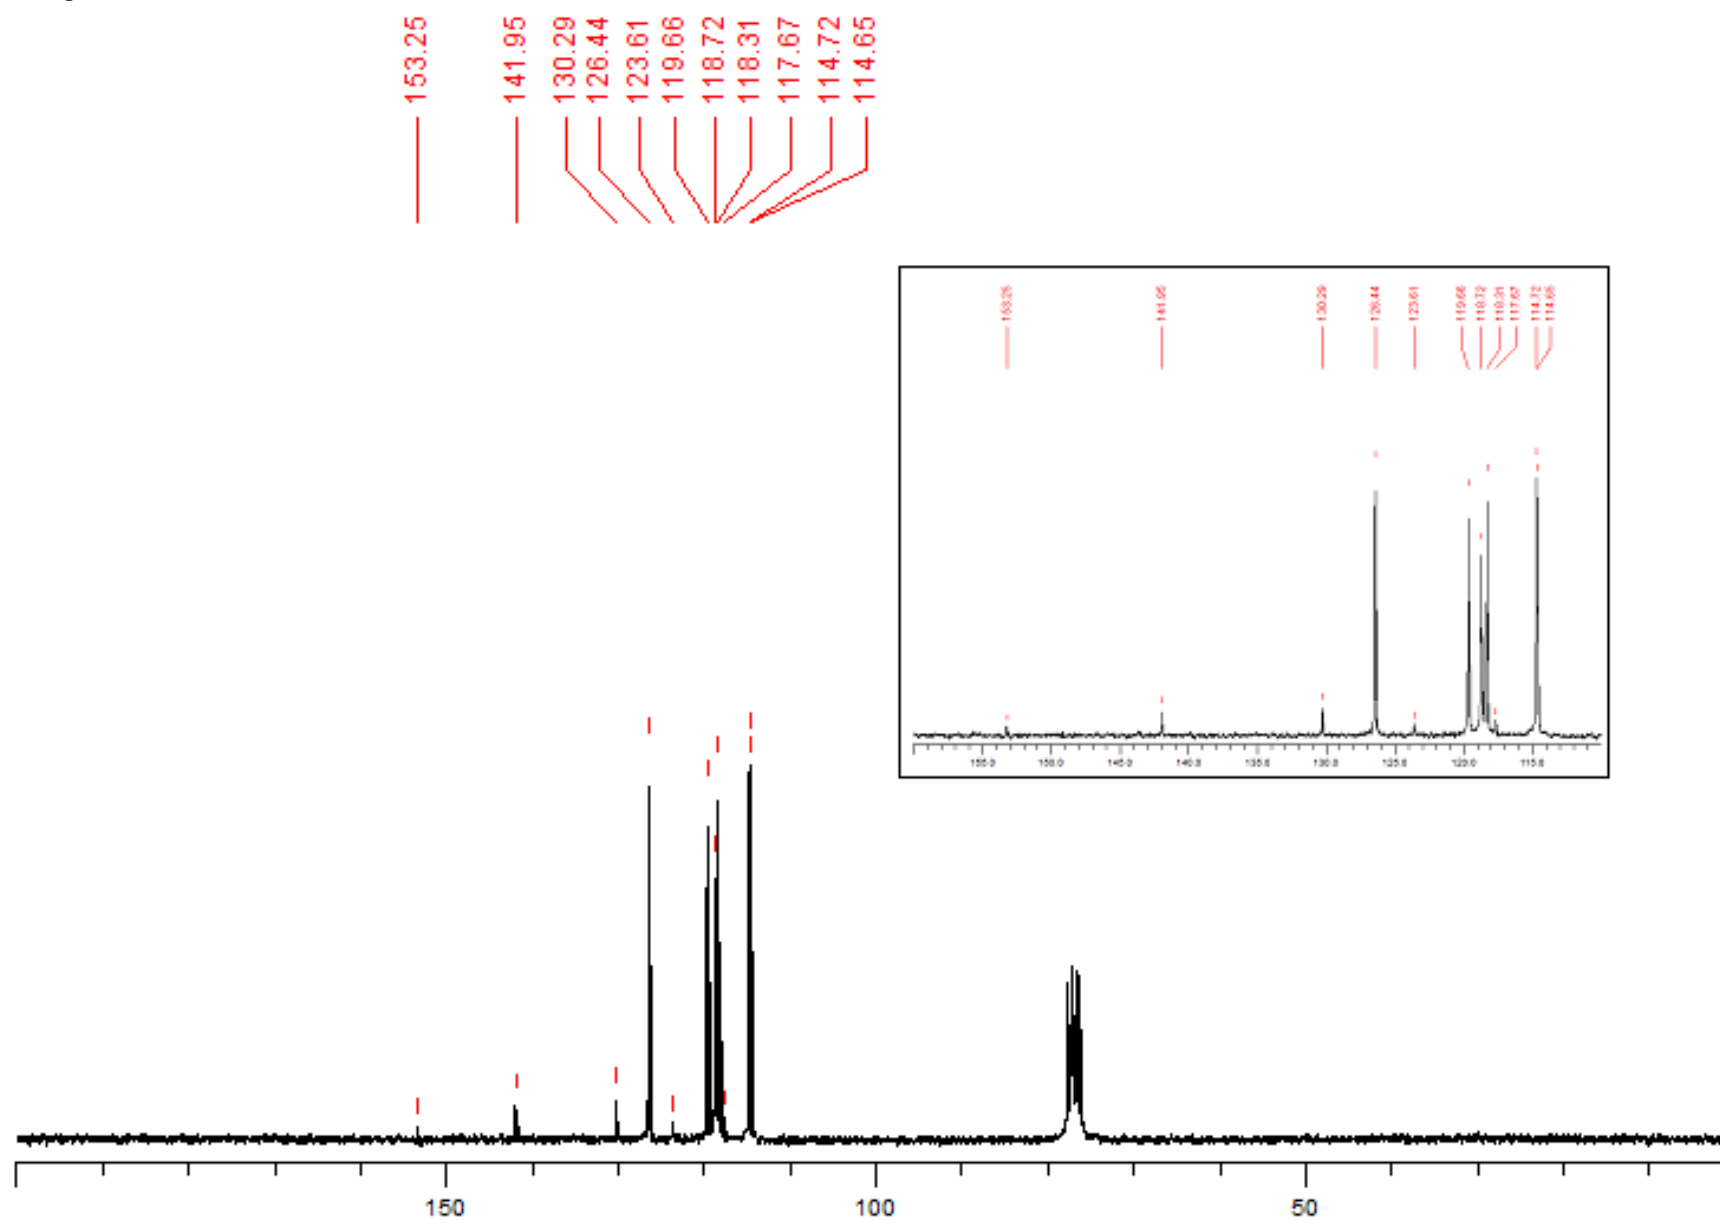



<sup>1</sup>H NMR Compound **7hk**.

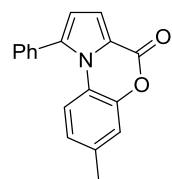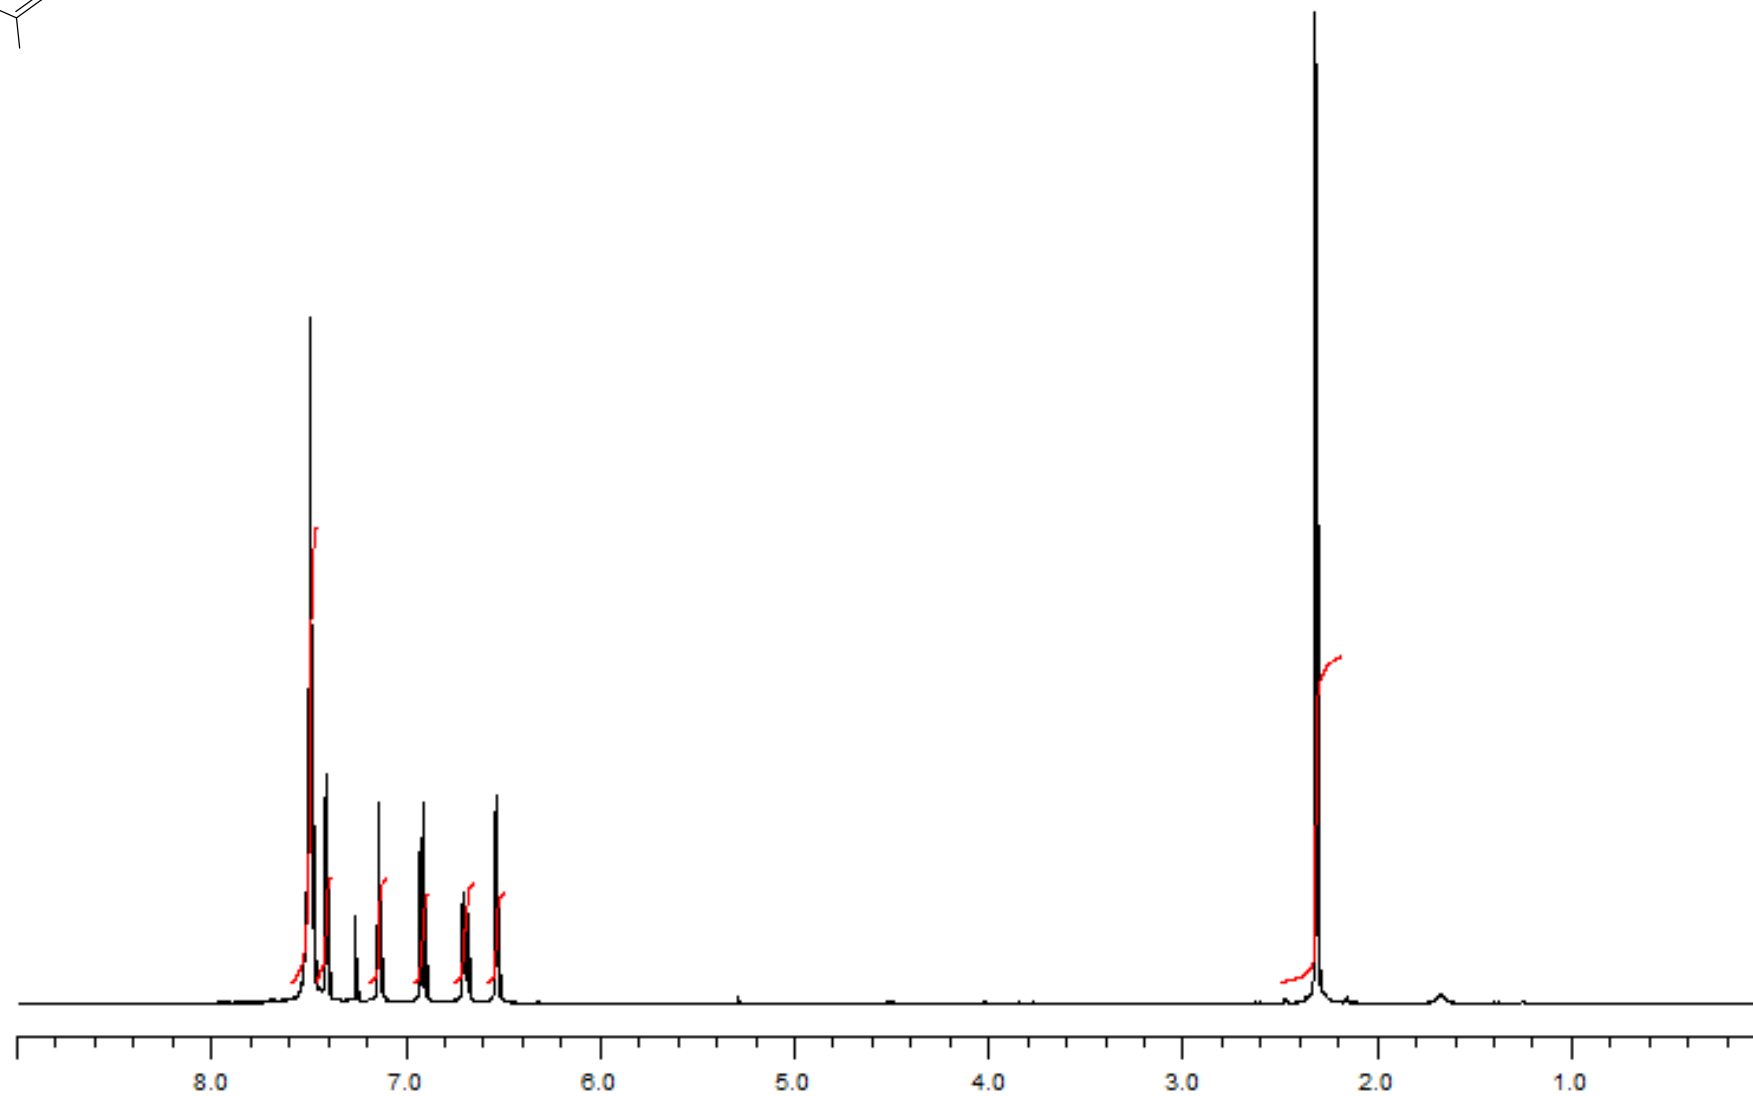

<sup>13</sup>C NMR Compound **7hk**.

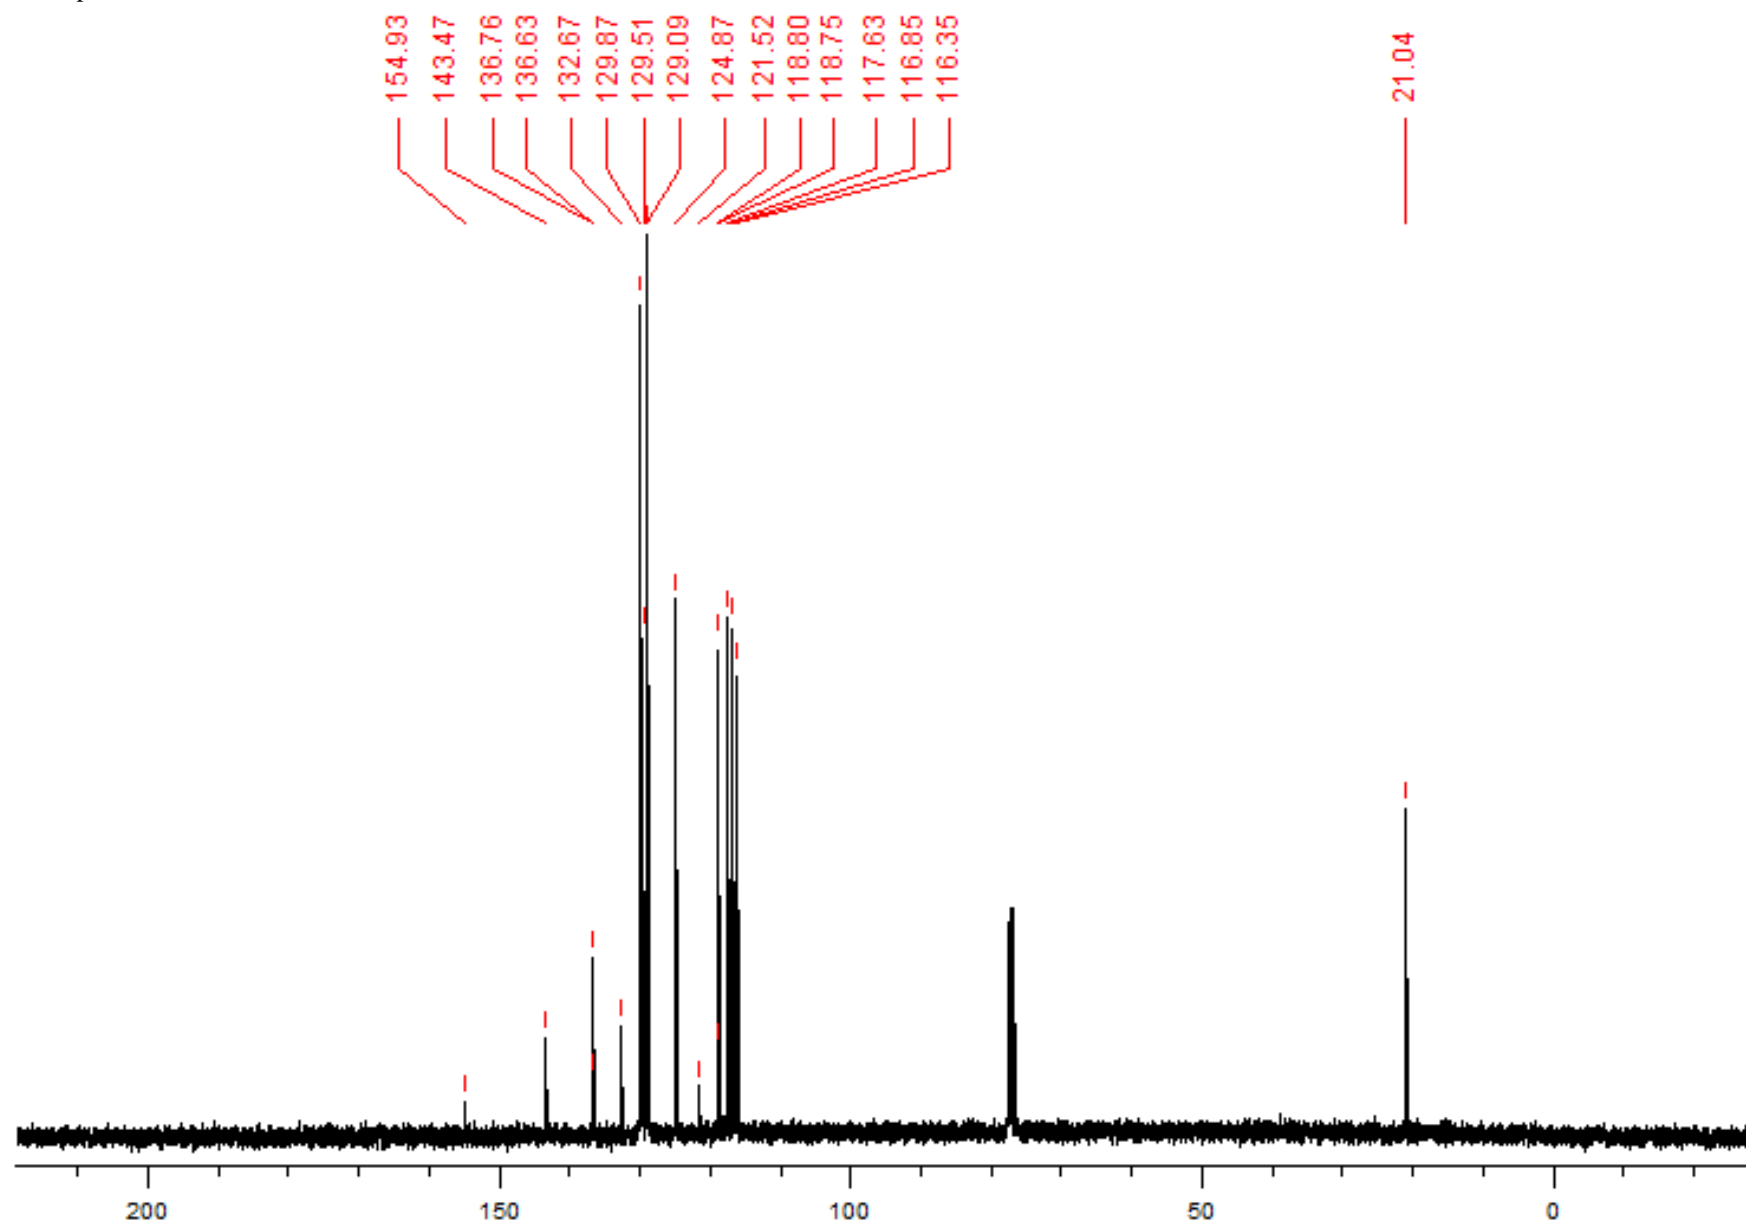

Supplement: c4ra13094d1.pdf [file c4ra13094d1.pdf]
