# Supplementary material for: One-pot synthesis of alkyl pyrrole-2-carboxylates starting from β-nitroacrylates and primary amines
Source: Royal Society of Chemistry journal article supplement (doi:10.1039/c4ra13094d), 2014-12-09
Supplement: c4ra13094d2.pdf [file c4ra13094d2.pdf]

## Supporting Information

### General Remarks

<sup>1</sup>H-NMR were recorded at 400 MHz on a VarianMercury Plus 400. <sup>13</sup>C-NMR were recorded at 100 MHz. IR spectra were recorded with a PerkinElmer Paragon 500 FT-IR. Mass spectra were performed on a GC/MS system by means of the EI technique (70 eV). Microanalyses were performed with a CHNS-O analyzer Model EA 1108 from Fisons Instruments.

### Synthesis of compounds 1.

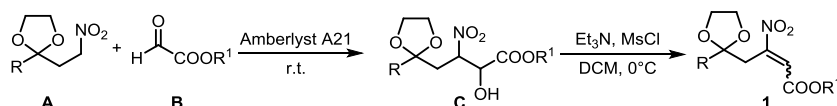

Compounds **1** were synthesized by a nitroaldol-dehydration process, starting from protected nitroketone **A** and aldehydes **B**.<sup>1</sup> In turn, compounds **A** can be easily synthesized by Curran<sup>2</sup> or Ono<sup>3</sup> methodologies, and compounds **B** can be prepared by Shing procedure.<sup>4</sup>

1) R. Ballini, D. Fiorini, A. Palmieri, *Tetrahedron Lett.* 2004, **45**, 7027. 2) D. P. Curran and T. A. Heffner, *J. Org. Chem.* 1990, **55**, 4585. 3) N. Ono, M. Fujii and A. Kaji, *Synthesis* 1987, 532. 4) Y.-L. Zhong and T. K. M. Shing, *J. Org. Chem.* 1997, **62**, 2622.

### General procedure for the preparation of pyrrole-2-carboxylates 6.

A mixture of  $\beta$ -nitroacrylate **1** (1 mmol) and amine **2** (1 mmol) was stirred at room temperature for the appropriate time (Time1, see Table 2). Then, 2-MeTHF (10 mL) and Amberlyst 15 (200 mg) were added and the resulting mixture was stirred at 60°C for the needed time (Time2, see Table 2). Finally, after the reaction was completed, Amberlyst 15 was filtered off washing with fresh 2-MeTHF (5 mL) and, after removing the solvent at reduced pressure, the crude product **6** was purified by flash chromatography column (hexanes:EtOAc = 95:5).

### General procedure for the flow preparation of pyrrole-2-carboxylates 6ab and 6ac.

The solutions of starting materials **1a** (0.2 M in 2-MeTHF) and **2b** (or **2c**) (0.2 M in 2-MeTHF) were pumped by means of HPLC pumps (model: Hewlett-Packard HPLC pump series 1050; flow rate of 0.05 mL/min) to the T-mixing piece **T1**, and then passed into the reactors **R1** (internal volume of 10 mL) and **R2** (heated at 60°C and packed with Amberlyst 15, 1.5 g/mmol) maintained under controlled pressure by a back pressure regulator (~2 atm). Finally, after removing the solvent at reduced pressure, the crude product **6** was purified by flash chromatography column (hexanes:EtOAc = 95:5).

**General procedure for the preparation of pyrrolebenzoxazinone 7.** A mixture of  $\beta$ -nitroacrylate **1** (1 mmol) and aminophenole **2** (1 mmol) in 2-MeTHF (0.3 mL) was stirred at room temperature for 7 hours. Then, 2-MeTHF (9.7 mL) and Amberlyst 15 (200 mg) were added and the resulting mixture was stirred at 60°C for further 7 h. After the reaction was completed, Amberlyst 15 was filtered off washing with fresh 2-MeTHF (5 mL) and, after the solvent evaporation, the crude product **6** was dissolved in toluene (10 mL), treated with *p*-TSA-H<sub>2</sub>O (0.3 mmol, 57 mg) and heated at reflux for 1.5 hours. Then, the solution was treated with a saturated solution of sodium bicarbonate (10 mL) and the mixture was extracted with EtOAc (3 x 20 mL). Finally, the organic phase was dried over Na<sub>2</sub>SO<sub>4</sub> and after the filtration and solvent evaporation, the crude product **7** was purified by flash chromatography column (hexanes:EtOAc = 95:5).

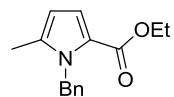

Compound **6aa**. Yield 68%. Colourless oil. IR (cm<sup>-1</sup>, neat): 694, 728, 759, 1029, 1132, 1232, 1267, 1482, 1694. <sup>1</sup>H-NMR (CDCl<sub>3</sub>, 400MHz)  $\delta$ : 1.30 (t, 3H, *J* = 7.3 Hz), 2.20 (s, 3H), 4.23 (q, 2H, *J* = 7.3 Hz), 5.64 (s, 2H), 6.02 (d, 1H, *J* = 3.8 Hz), 6.90-6.99 (m, 2H), 7.03 (d, 1H, *J* = 3.8 Hz), 7.17-7.37 (m, 3H). <sup>13</sup>C-NMR (CDCl<sub>3</sub>, 100MHz)  $\delta$ : 12.8, 14.6, 48.3, 59.8, 108.4, 118.1, 122.1, 126.0, 127.1, 128.8, 137.4, 138.6, 161.4. GC-MS (70 eV): *m/z*: 243 ([M<sup>+</sup>], 69), 197 (21), 170 (14), 108 (14), 91 (100), 65 (15). Anal. Calcd. for C<sub>15</sub>H<sub>17</sub>NO<sub>2</sub> (243.31): C, 74.05; N, 5.76; H, 7.04. Found: C, 74.11; N, 5.72; H, 7.09.

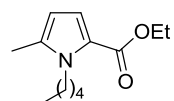

Compound **6ab**. Yield 72%. Colourless oil. IR (cm<sup>-1</sup>, neat): 750, 1112, 1238, 1470, 1483, 1469. <sup>1</sup>H-NMR (CDCl<sub>3</sub>, 400MHz)  $\delta$ : 0.84-0.98 (m, 3H), 1.24-1.42 (m, 7H), 1.58-1.80 (m, 2H), 2.28 (s, 3H), 4.20-4.33 (m, 4H), 5.91 (d, 1H, *J* = 3.8 Hz), 6.92 (d, 1H, *J* = 3.8 Hz). <sup>13</sup>C-NMR (CDCl<sub>3</sub>, 100MHz)  $\delta$ : 12.8, 14.2, 14.7, 22.7, 29.2, 31.1, 45.4, 59.6, 107.9, 117.7, 121.5, 136.4, 161.3. GC-MS (70 eV): *m/z*: 223 ([M<sup>+</sup>], 35), 178 (18), 167 (35), 150 (100), 138 (22), 108 (26), 94 (47). Anal. Calcd. for C<sub>13</sub>H<sub>21</sub>NO<sub>2</sub> (223.32): C, 69.92; N, 6.27; H, 9.48. Found: C, 70.00; N, 6.22; H, 9.53.

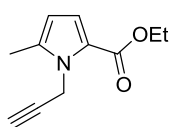

Compound **6ac**. Yield 68% White solid, m.p. = 37-39°C. IR (cm<sup>-1</sup>, neat): 672, 747, 1043, 1139, 1257, 1484, 1677, 2122, 3269. <sup>1</sup>H-NMR (CDCl<sub>3</sub>, 400MHz) δ: 1.34 (t, 3H, *J* = 7.3 Hz), 2.26 (t, 1H, *J* = 2.5 Hz), 2.34 (s, 3H), 4.28 (q, 2H, *J* = 7.3 Hz), 5.18 (d, 2H, *J* = 2.5 Hz), 5.93 (d, 1H, *J* = 3.8 Hz), 6.92 (d, 1H, *J* = 3.8 Hz). <sup>13</sup>C-NMR (CDCl<sub>3</sub>, 100MHz) δ: 12.6, 14.7, 34.3, 60.0, 72.0, 79.0, 108.5, 118.2, 121.4, 137.1, 161.4. GC-MS (70 eV): *m/z*: 191 ([M<sup>+</sup>], 65), 163 (57), 162 (83), 146 (53), 134 (29), 118 (100), 117 (49), 91 (30), 78 (19), 65 (23), 52 (29), 39 (43). Anal. Calcd. for C<sub>11</sub>H<sub>13</sub>NO<sub>2</sub> (191.23): C, 69.09; N, 7.32; H, 6.85. Found: C, 69.14; N, 7.29; H, 6.89.

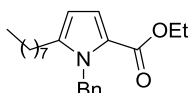

Compound **6ba**. Yield 70%. White solid, m.p. = 29-31°C. IR (cm<sup>-1</sup>, neat): 699, 732, 751, 1115, 1129, 1260, 1452, 1468, 1691. <sup>1</sup>H-NMR (CDCl<sub>3</sub>, 400MHz) δ: 0.88 (t, 3H, *J* = 7.3 Hz), 1.19-1.35 (m, 13H), 1.50-1.62 (m, 2H), 2.47 (t, 2H, *J* = 7.7 Hz), 4.20 (q, 2H, *J* = 7.3 Hz), 5.63 (s, 2H), 6.03 (d, 1H, *J* = 3.8 Hz), 6.90 (d, 2H, *J* = 7.7 Hz), 7.04 (d, 1H, *J* = 3.8 Hz), 7.17-7.30 (m, 3H). <sup>13</sup>C-NMR (CDCl<sub>3</sub>, 100MHz) δ: 14.3, 14.6, 22.9, 26.7, 28.6, 29.4, 29.6, 32.1, 48.1, 59.8, 107.3, 118.1, 122.0, 125.9, 127.1, 128.8, 138.9, 142.1, 161.4. GC-MS (70 eV): *m/z*: 341 ([M<sup>+</sup>], 21), 242 (16), 170 (24), 91 (100), 65 (7). Anal. Calcd. for C<sub>22</sub>H<sub>31</sub>NO<sub>2</sub> (341.49): C, 77.38; N, 4.10; H, 9.15. Found: C, 77.44; N, 4.08; H, 9.18.

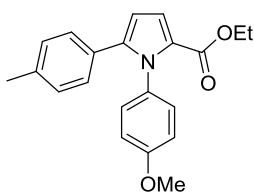

Compound **6cd**. Yield 60%. Pale yellow solid, m.p. = 127-129°C. IR (cm<sup>-1</sup>, neat): 753, 821, 1026, 1089, 1153, 1232, 1462, 1512, 1611, 1706. <sup>1</sup>H-NMR (CDCl<sub>3</sub>, 400MHz) δ: 1.23 (t, 3H, *J* = 7.3 Hz), 2.28 (s, 3H), 3.81 (s, 3H), 4.16 (q, 2H, *J* = 7.3 Hz), 6.38 (d, 1H, *J* = 4.3 Hz), 6.86 (d, 2H, *J* = 8.6 Hz), 7.01 (s, 4H), 7.09-7.17 (m, 3H). <sup>13</sup>C-NMR (CDCl<sub>3</sub>, 100MHz) δ: 14.6, 21.4, 55.6, 59.9, 109.6, 113.8, 118.4, 125.1, 128.9, 129.0, 129.4, 129.8, 132.3, 137.3, 141.8, 159.2, 160.8. GC-MS (70 eV): *m/z*: 335 ([M<sup>+</sup>], 100), 290 (14), 262 (83), 248 (22), 129 (21). Anal. Calcd. for C<sub>21</sub>H<sub>21</sub>NO<sub>3</sub> (335.40): C, 75.20; N, 4.18; H, 6.31. Found: C, 75.14; N, 4.21; H, 6.28.

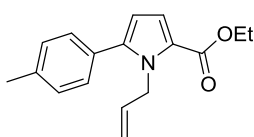

Compound **6ce**. Yield 70%. Colourless oil. IR (cm<sup>-1</sup>, neat): 751, 823, 1118, 1133, 1218, 1260, 1443, 1465, 1544, 1695. <sup>1</sup>H-NMR (CDCl<sub>3</sub>, 400MHz) δ: 1.35 (t, 3H, *J* = 7.3 Hz), 2.40 (s, 3H), 4.29 (q, 2H, *J* = 7.3 Hz), 4.73-4.81 (m, 1H), 4.91-4.97 (m, 2H), 5.07-5.14 (m, 1H), 5.91-6.06 (m, 1H), 6.20 (d, 1H, *J* = 3.8 Hz), 7.09 (d, 1H, *J* = 3.8 Hz), 7.22 (d, 2H, *J* = 8.1 Hz), 7.31 (d, 2H, *J* = 8.1 Hz). <sup>13</sup>C-NMR (CDCl<sub>3</sub>, 100MHz) δ: 14.7, 21.5, 48.2, 60.0, 109.5, 115.4, 118.3, 122.9, 129.3, 129.5, 129.6, 136.0, 138.3, 141.9, 161.3. GC-MS (70 eV): *m/z*: 269 ([M<sup>+</sup>], 100), 240 (10), 224 (31), 196 (45), 172 (17), 156 (12), 129 (30), 115 (10), 80 (13). Anal. Calcd. for C<sub>17</sub>H<sub>19</sub>NO<sub>2</sub> (269.34): C, 75.81; N, 5.20; H, 7.11. Found: C, 75.87; N, 5.18; H, 7.15.

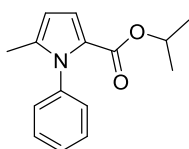

Compound **6df**. Yield 75%. White solid, m.p. = 61-63°C. IR (cm<sup>-1</sup>, neat): 698, 750, 1039, 1104, 1152, 1274, 1362, 1485, 1550, 1595, 1678. <sup>1</sup>H-NMR (CDCl<sub>3</sub>, 400MHz) δ: 1.10 (d, 6H, *J* = 6.4 Hz), 2.02 (s, 3H), 4.91-5.03 (m, 1H), 6.04 (d, 1H, *J* = 3.8 Hz), 7.02 (d, 1H, *J* = 3.8 Hz), 7.18-7.23 (m, 2H), 7.38-7.49 (m, 3H). <sup>13</sup>C-NMR (CDCl<sub>3</sub>, 100MHz) δ: 13.3, 22.0, 66.9, 108.2, 117.9, 124.5, 128.1, 128.3, 128.9, 137.5, 139.8, 160.3. GC-MS (70 eV): *m/z*: 243 ([M<sup>+</sup>], 78), 201 (100), 184 (50), 156 (66), 128 (16), 108 (35), 77 (28), 51 (14). Anal. Calcd. for C<sub>15</sub>H<sub>17</sub>NO<sub>2</sub> (243.31): C, 74.05; N, 5.76; H, 7.04. Found: C, 74.11; N, 5.73; H, 7.09.

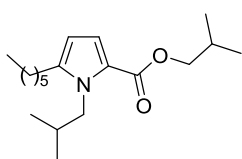

Compound **6eg**. Yield 73%. Colourless oil. IR (cm<sup>-1</sup>, neat): 750, 1113, 1232, 1256, 1469, 1478, 1697. <sup>1</sup>H-NMR (CDCl<sub>3</sub>, 400MHz) δ: 0.83-0.93 (m, 9H), 0.98 (d, 6H, *J* = 6.8 Hz), 1.26-1.44 (m, 6H), 1.59-1.71 (m, 2H), 1.95-2.13 (m, 2H), 2.55 (t, 2H, *J* = 7.7 Hz), 3.96 (d, 2H, *J* = 6.8 Hz), 4.02-4.17 (m, 2H), 5.94 (d, 1H, *J* = 3.8 Hz), 6.96 (d, 1H, *J* = 3.8 Hz). <sup>13</sup>C-NMR (CDCl<sub>3</sub>, 100MHz) δ: 14.3, 19.5, 20.1, 22.8, 27.1, 28.2, 28.8, 29.4, 30.6, 31.9, 51.8, 69.8, 106.5, 118.0, 121.6, 142.0, 161.6. GC-MS (70 eV): *m/z*: 307 ([M<sup>+</sup>], 57), 264 (69), 236 (76), 234 (47), 208 (27), 206 (100), 182 (45), 180 (83), 164 (26), 162 (64), 138 (67), 136 (55), 124 (43), 106 (73), 94 (34), 80 (27), 57 (33), 41 (45), 29 (27). Anal. Calcd. for C<sub>19</sub>H<sub>33</sub>NO<sub>2</sub> (307.48): C, 74.22; N, 4.56; H, 10.82. Found: C, 74.29; N, 4.52; H, 10.87.

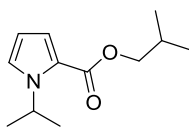

Compound **6fh**. Yield 64%. Pale yellow oil. IR (cm<sup>-1</sup>, neat): 731, 1067, 1106, 1208, 1227, 1415, 1698. <sup>1</sup>H-NMR (CDCl<sub>3</sub>, 400MHz) δ: 1.00 (d, 6H, *J* = 6.8 Hz), 1.44 (d, 6H, *J* = 6.4 Hz), 1.97-2.10 (m, 1H), 4.00 (d, 2H, *J* = 6.4 Hz), 5.40-5.54 (m, 1H), 6.16 (t, 1H, *J* = 3.4 Hz), 6.96-7.00 (m, 1H), 7.02-7.06 (m, 1H). <sup>13</sup>C-NMR (CDCl<sub>3</sub>, 100MHz) δ: 19.5, 24.0, 28.2, 48.6, 70.0, 108.3, 118.1, 122.0, 123.8, 161.5. GC-MS (70 eV): *m/z*: 210 ([M+1<sup>+</sup>], 4), 209 ([M<sup>+</sup>], 34), 153 (41), 138 (40), 136 (44), 111 (100), 94 (70), 93 (49), 66 (15), 41 (14). Anal. Calcd. for C<sub>12</sub>H<sub>19</sub>NO<sub>2</sub> (209.29): C, 68.87; N, 6.69; H, 9.15. Found: C, 68.94; N, 6.65; H, 9.19.

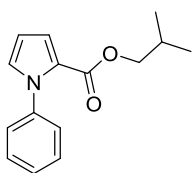

Compound **6ff**. Yield 63%. Pale yellow oil. IR (cm<sup>-1</sup>, neat): 696, 737, 757, 1119, 1264, 1417, 1498, 1598, 1710. <sup>1</sup>H-NMR (CDCl<sub>3</sub>, 400MHz) δ: 0.86 (d, 6H, *J* = 6.8 Hz), 1.78-1.93 (m, 1H), 3.89 (d, 2H, *J* = 6.4 Hz), 6.28-6.31 (m, 1H), 6.93-6.95 (m, 1H), 7.12-7.15 (m, 1H), 7.30-7.34 (m, 2H), 7.38-7.46 (m, 3H). <sup>13</sup>C-NMR (CDCl<sub>3</sub>, 100MHz) δ: 19.3, 28.0, 70.4, 109.3, 119.1, 124.0, 126.6, 128.0, 128.8, 129.9, 140.8, 160.9. GC-MS (70 eV): *m/z*: 243 ([M<sup>+</sup>], 30), 187 (100), 170 (88), 143 (39), 115 (60), 94 (49), 77 (18), 51 (12), 39 (12). Anal. Calcd. for C<sub>15</sub>H<sub>17</sub>NO<sub>2</sub> (243.31): C, 74.05; N, 5.76; H, 7.04. Found: C, 74.00; N, 5.79; H, 6.99.

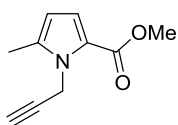

Compound **6gc**. Yield 53%. Pale yellow solid, m.p. = 40-42°C. IR (cm<sup>-1</sup>, neat): 666, 750, 1041, 1135, 1225, 1256, 1435, 1482, 1694, 2122, 3264. <sup>1</sup>H-NMR (CDCl<sub>3</sub>, 400MHz) δ: 2.26 (t, 1H, *J* = 2.5 Hz), 2.35 (s, 3H), 3.81 (s, 3H), 5.18 (d, 2H, *J* = 2.5 Hz), 5.94 (d, 1H, *J* = 3.8 Hz), 6.91 (d, 1H, *J* = 3.8 Hz). <sup>13</sup>C-NMR (CDCl<sub>3</sub>, 100MHz) δ: 12.6, 34.3, 51.3, 72.1, 79.0, 108.7, 118.3, 121.0, 137.2, 161.8. GC-MS (70 eV): *m/z*: 177 ([M<sup>+</sup>], 91), 162 (100), 146 (45), 134 (36), 118 (60), 117 (51), 91 (28), 78 (18), 65 (19), 52 (25), 39 (35). Anal. Calcd. for C<sub>10</sub>H<sub>11</sub>NO<sub>2</sub> (177.20): C, 67.78; N, 7.90; H, 6.26. Found: C, 67.84; N, 7.84; H, 6.30.

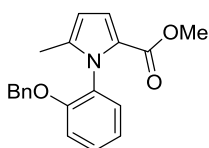

Compound **6gi**. Yield 63%. Yellow viscous oil. IR (cm<sup>-1</sup>, neat): 699, 753, 1032, 1101, 1153, 1270, 1481, 1593, 1682. <sup>1</sup>H-NMR (CDCl<sub>3</sub>, 400MHz) δ: 2.05 (s, 3H), 3.67 (s, 3H), 5.07 (s, 2H), 6.13 (d, 1H, *J* = 3.8 Hz), 7.05-7.14 (m, 3H), 7.18-7.45 (m, 7H). <sup>13</sup>C-NMR (CDCl<sub>3</sub>, 100MHz) δ: 13.0, 51.0, 70.5, 108.3, 114.1, 118.0, 121.3, 123.4, 126.8, 127.9, 128.7, 129.0, 129.6, 129.9, 137.2, 138.1, 154.7, 161.1. GC-MS (70 eV): *m/z*: 321 ([M<sup>+</sup>], 29), 289 (11), 262 (79), 239 (28), 198 (20), 170 (47), 91 (100), 65 (18). Anal. Calcd. for C<sub>20</sub>H<sub>19</sub>NO<sub>3</sub> (321.38): C, 74.75; N, 4.36; H, 5.96. Found: C, 74.81; N, 4.33; H, 6.00.

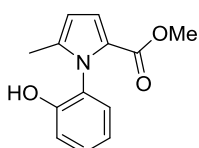

Compound **6gj**. Yield 57%. White solid, m.p. = 131-133°C. IR (cm<sup>-1</sup>, neat): 701, 749, 1033, 1104, 1151, 1272, 1485, 1598, 1691, 3352. <sup>1</sup>H-NMR (CDCl<sub>3</sub>, 400MHz) δ: 2.01 (s, 3H), 3.67 (s, 3H), 5.22 (bs, 1H), 6.12 (d, 1H, *J* = 3.8 Hz), 6.96-7.08 (m, 4H), 7.30-7.36 (m, 1H). <sup>13</sup>C-NMR (CDCl<sub>3</sub>, 100MHz) δ: 12.8, 51.4, 109.3, 117.0, 119.0, 121.0, 123.5, 126.4, 128.9, 130.4, 138.7, 152.3, 161.1. GC-MS (70 eV): *m/z*: 231 ([M<sup>+</sup>], 89), 200 (33), 199 (59), 198 (36), 172 (100), 171 (21), 170 (84), 154 (21), 144 (18), 130 (14), 115 (19), 77 (14), 65 (20), 63 (17), 53 (22), 51 (18), 39 (25). Anal. Calcd. for C<sub>13</sub>H<sub>13</sub>NO<sub>3</sub> (231.25): C, 67.52; N, 6.06; H, 5.67. Found: C, 67.60; N, 6.01; H, 5.71.

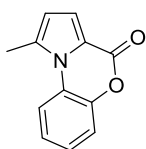

Compound **7gj**. Yield 98% from **6gj**, yield 54% from **1g** and **2j**. White solid, m.p. = 170-172°C. IR (cm<sup>-1</sup>, neat): 717, 731, 751, 792, 967, 1102, 1216, 1290, 1414, 1489, 1500, 1604, 1716. <sup>1</sup>H-NMR (CDCl<sub>3</sub>, 400MHz) δ: 2.81 (s, 3H), 6.37 (d, 1H, *J* = 3.8 Hz), 7.21-7.31 (m, 3H), 7.34-7.39 (m, 1H), 7.90-7.94 (m, 1H). <sup>13</sup>C-NMR (CDCl<sub>3</sub>, 100MHz) δ: 17.3, 115.6, 115.9, 117.6, 118.1, 118.9, 124.7, 124.9, 126.1, 133.8, 143.5, 154.3. GC-MS (70 eV): *m/z*: 199 ([M<sup>+</sup>], 100), 170 (87), 154 (19), 130 (14), 115 (10), 63 (9). Anal. Calcd. for C<sub>12</sub>H<sub>9</sub>NO<sub>2</sub> (199.21): C, 72.35; N, 7.03; H, 4.55. Found: C, 72.41; N, 6.99; H, 4.58.

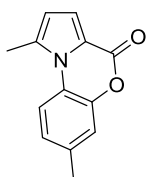

Compound **7gk**. Yield 56%. White solid, m.p. = 163-166°C. IR (cm<sup>-1</sup>, neat): 732, 778, 793, 979, 1039, 1107, 1352, 1415, 1487, 1516, 1712. <sup>1</sup>H-NMR (CDCl<sub>3</sub>, 400MHz) δ: 2.37 (s, 3H), 2.76 (s, 3H), 6.34 (d, 1H, *J* = 3.8 Hz), 7.02 (dd, 1H, *J* = 8.5, 1.8 Hz), 7.14 (d, 1H, *J* = 0.9 Hz), 7.27 (d, 1H, *J* = 4.3 Hz), 7.77 (d, 1H, *J* = 8.5 Hz). <sup>13</sup>C-NMR (CDCl<sub>3</sub>, 100MHz) δ: 17.2, 21.0, 113.3, 115.2, 115.6, 116.2, 117.3, 119.0, 125.3, 133.5, 136.4, 143.3, 154.5. GC-MS (70 eV): *m/z*: 213 ([M<sup>+</sup>], 100), 184 (57), 168 (15), 154 (14), 144 (19), 116 (10), 77 (9), 39 (7). Anal. Calcd. for C<sub>13</sub>H<sub>11</sub>NO<sub>2</sub> (213.24): C, 73.23; N, 6.57; H, 5.20. Found: C, 73.29; N, 6.52; H, 5.25.

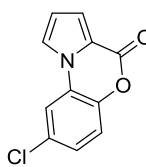

Compound **7fl**. Yield 54%. White solid, m.p. = 214-216°C. IR (cm<sup>-1</sup>, neat): 729, 746, 761, 805, 867, 978, 1184, 1346, 1508, 1608, 1718. <sup>1</sup>H-NMR (CDCl<sub>3</sub>, 400MHz) δ: 6.66-6.77 (m, 1H), 7.20-7.43 (m, 3H), 7.54-7.64 (m, 2H). <sup>13</sup>C-NMR (CDCl<sub>3</sub>, 100MHz) δ: 114.6, 114.7, 117.7, 118.3, 118.7, 119.7, 123.6, 126.5, 130.3, 142.0, 153.3. GC-MS (70 eV): *m/z*: 221 ([M+2<sup>+</sup>], 32), 219 ([M<sup>+</sup>], 100), 191 (20), 164 (12), 140 (15), 128 (20), 75 (8), 63 (9), 51 (8). Anal. Calcd. for C<sub>11</sub>H<sub>6</sub>NCIO<sub>2</sub> (219.62): C, 60.16; N, 6.38; H, 2.75. Found: C, 60.21; N, 6.33; H, 2.77.

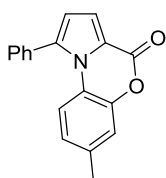

Compound **7hk**. Yield 42%. Pale yellow solid, m.p. = 121-123°C. IR (cm<sup>-1</sup>, neat): 702, 729, 768, 800, 856, 1099, 1347, 1508, 1736. <sup>1</sup>H-NMR (CDCl<sub>3</sub>, 400MHz) δ: 2.32 (s, 3H), 6.54 (d, 1H, *J* = 3.8 Hz), 6.66-6.72 (m, 1H), 6.91 (d, 1H, *J* = 8.5 Hz), 7.14 (s, 1H), 7.41 (d, 1H, *J* = 3.8 Hz), 7.46-7.53 (m, 5H). <sup>13</sup>C-NMR (CDCl<sub>3</sub>, 100MHz) δ: 21.0, 116.4, 116.9, 117.6, 118.7, 118.8, 121.5, 124.9, 129.1, 129.5, 129.9, 132.7, 136.6, 136.8, 143.5, 154.9. GC-MS (70 eV): *m/z*: 276 ([M+1<sup>+</sup>], 20), 275 ([M<sup>+</sup>], 100), 230 (31), 216 (12), 115 (19), 77 (7), 51 (7). Anal. Calcd. for C<sub>18</sub>H<sub>13</sub>NO<sub>2</sub> (275.31): C, 78.53; N, 5.09; H, 4.76. Found: C, 78.59; N, 5.04; H, 4.79.
